# Supplementary material for: Three-component access to 2-pyrrolin-5-ones and their use in target-oriented and diversity-oriented synthesis
Source: Royal Society of Chemistry journal article supplement (doi:10.1039/c6ra06317a), 2016-01-01

## Supporting information

### **Three-component access to 2-pyrrolin-5-ones and their use in target-oriented and diversity-oriented synthesis**

Ángel Cores, Verónica Estévez, Mercedes Villacampa and J. Carlos Menéndez\*

*Departamento de Química Orgánica y Farmacéutica, Facultad de Farmacia,  
Universidad Complutense, Plaza de Ramón y Cajal s.n., 28040 Madrid, Spain*

*josecm@farm.ucm.es*

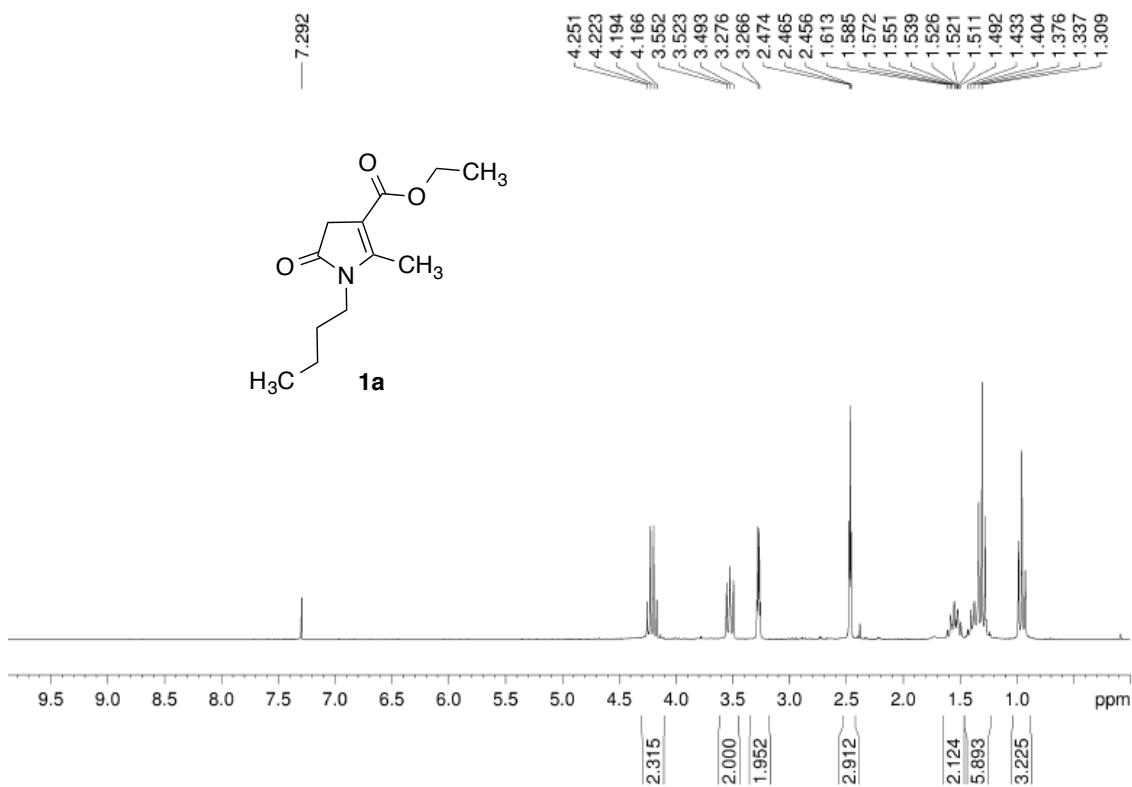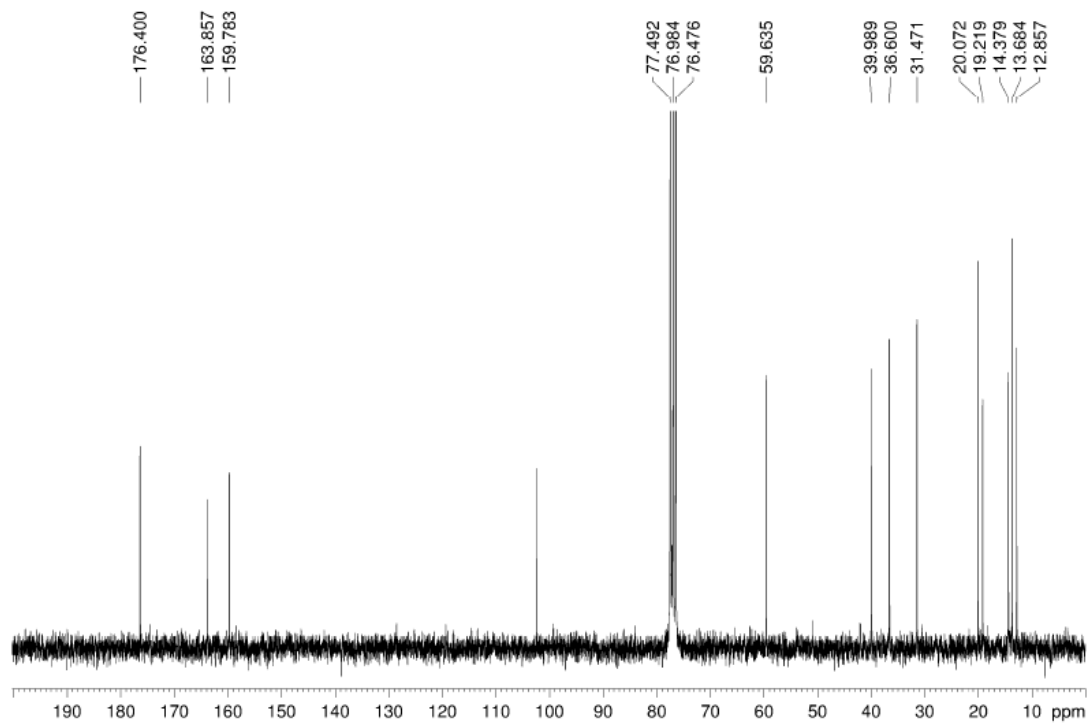

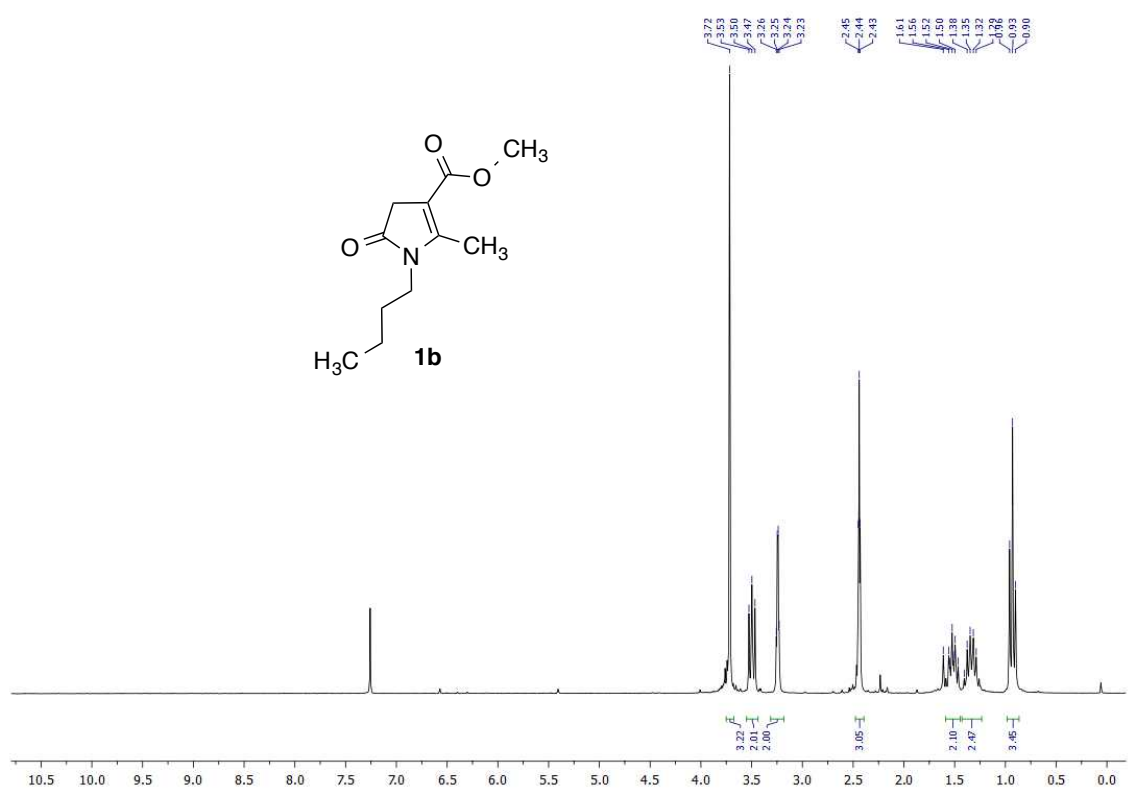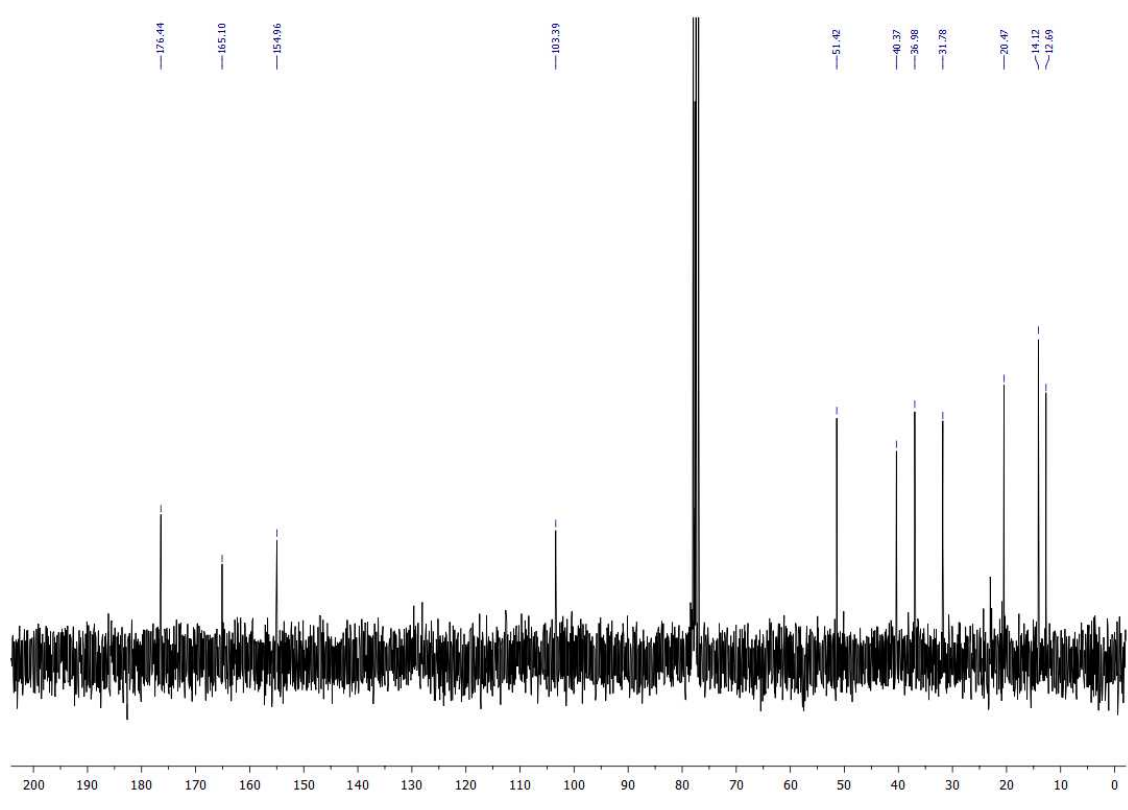

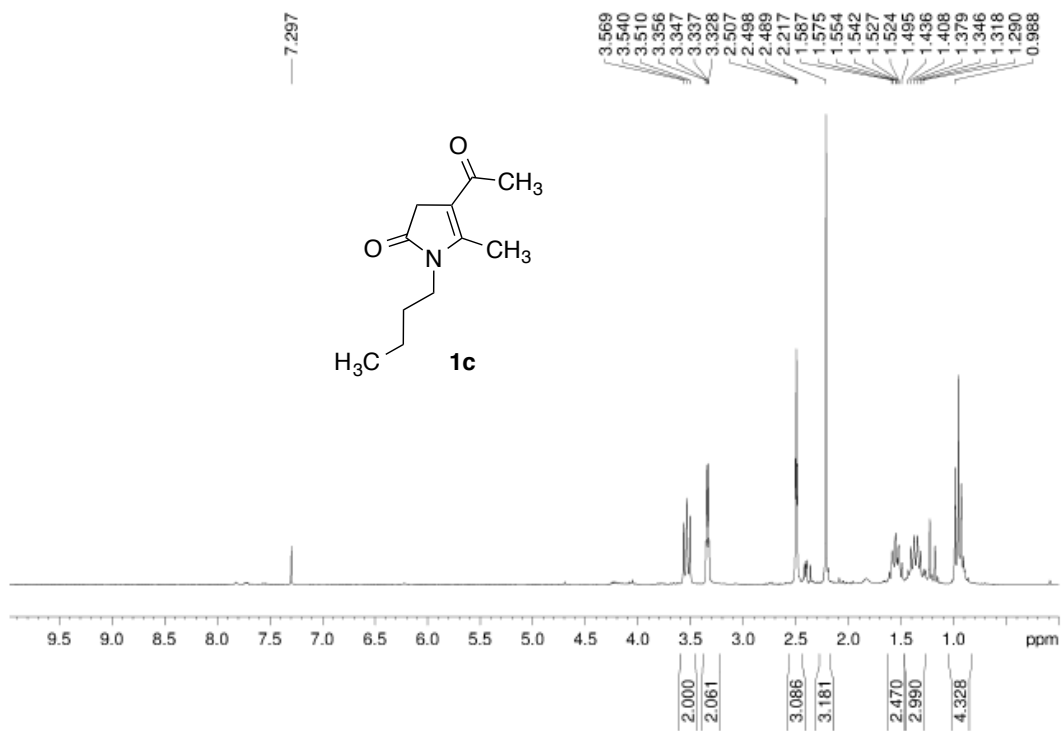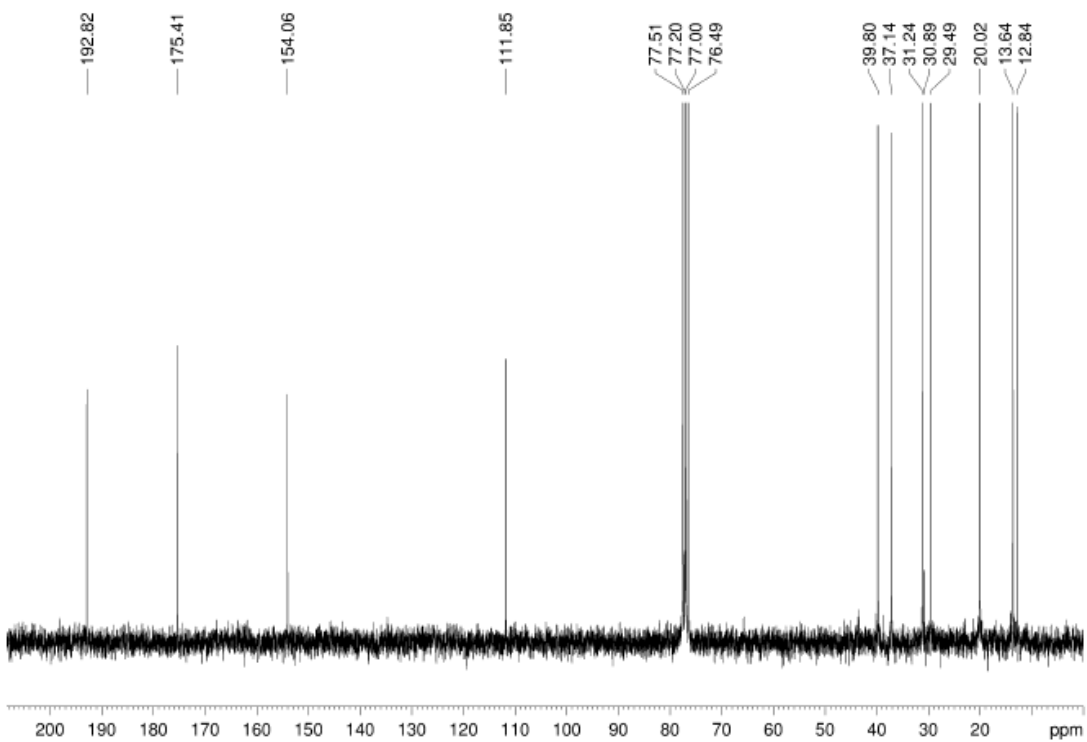

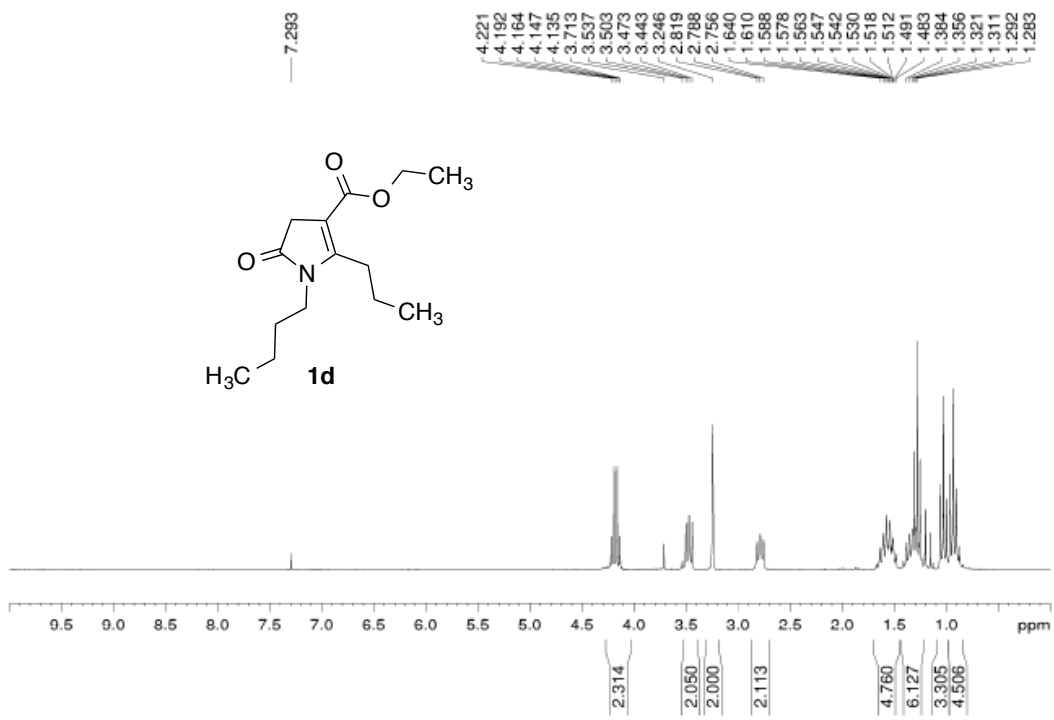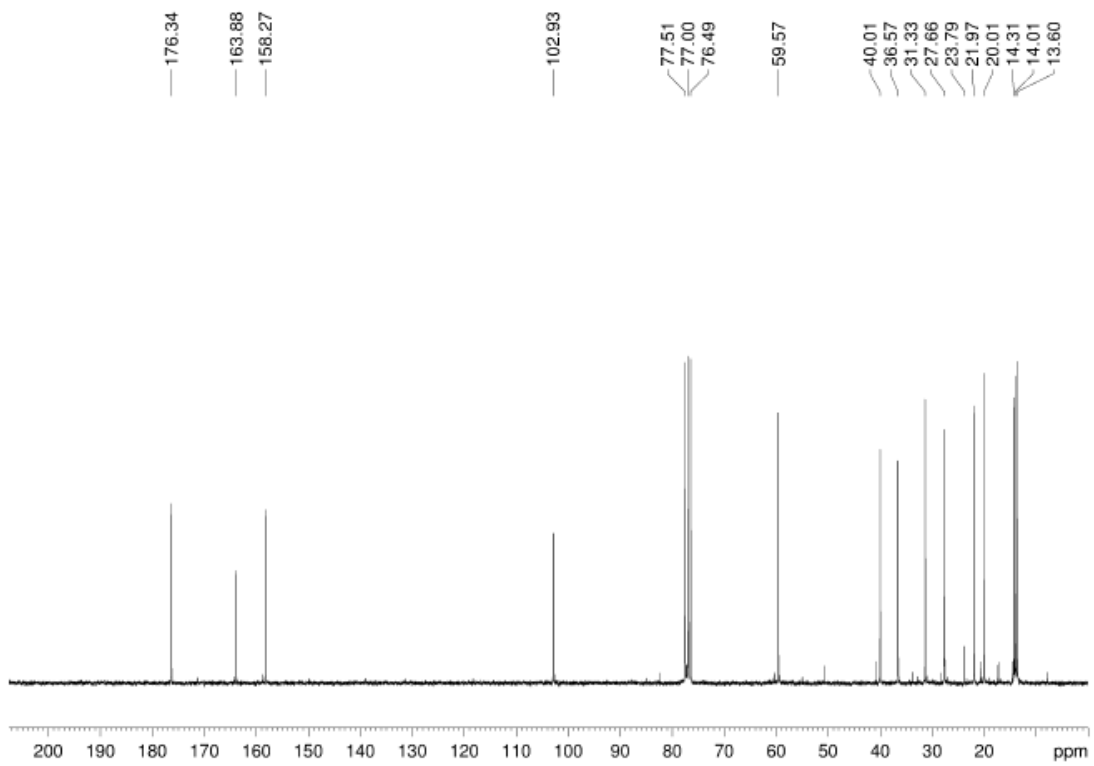

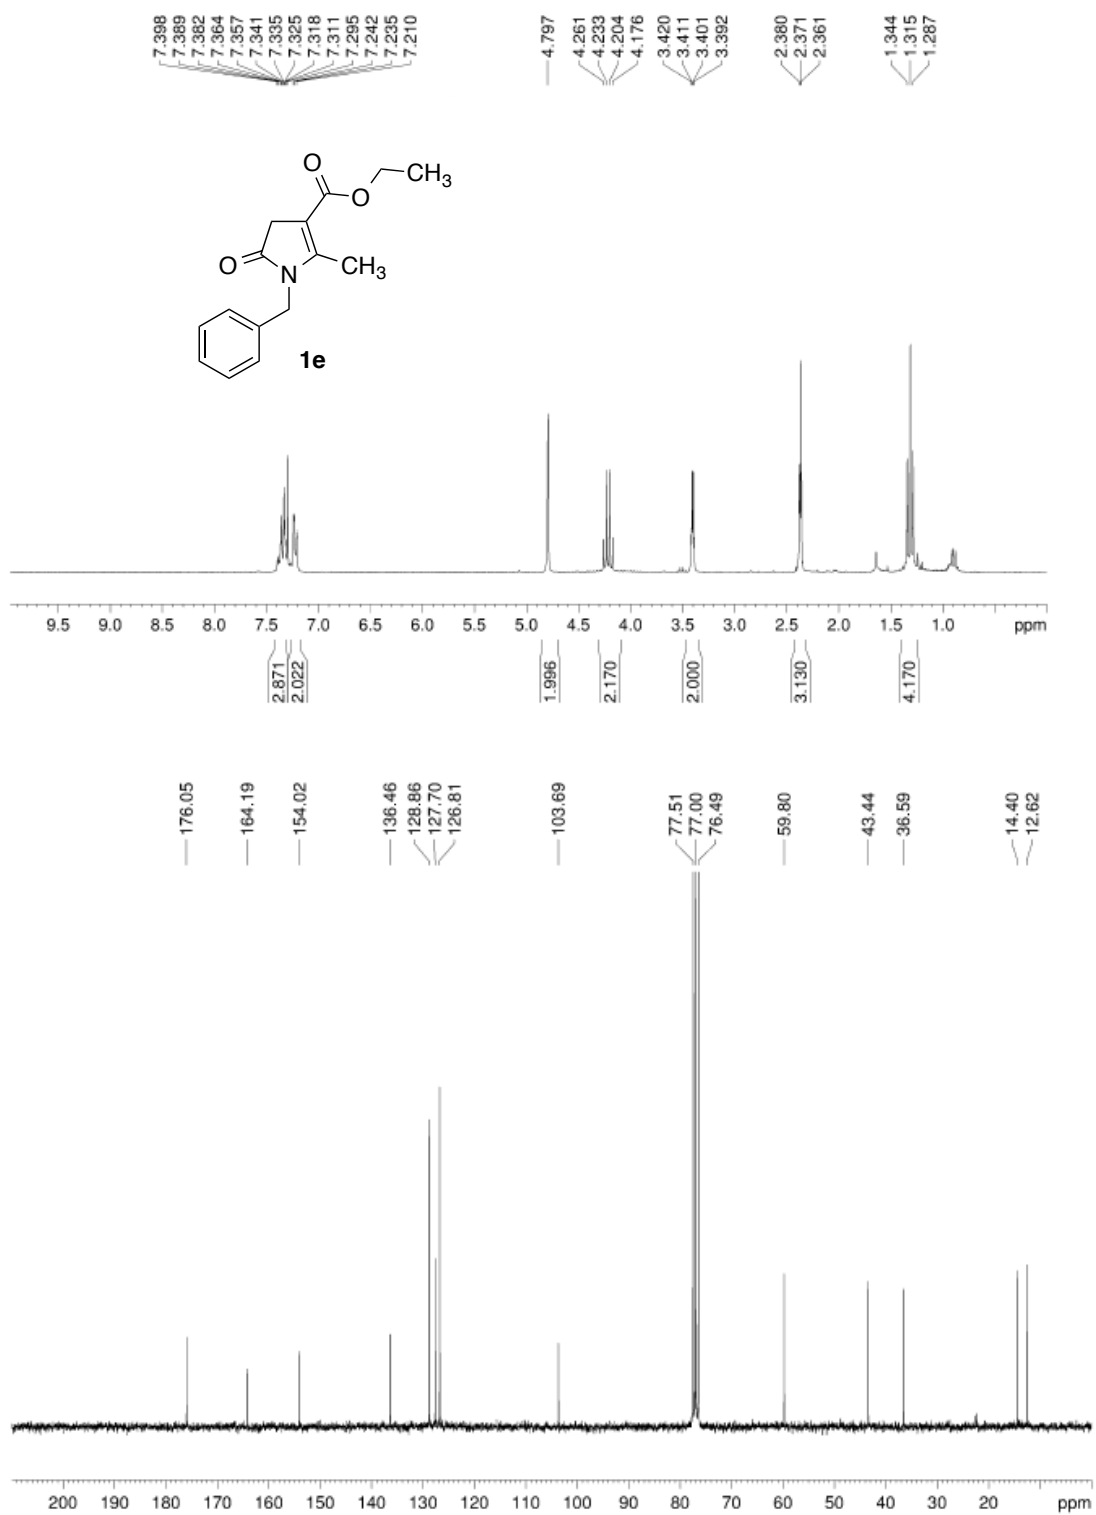

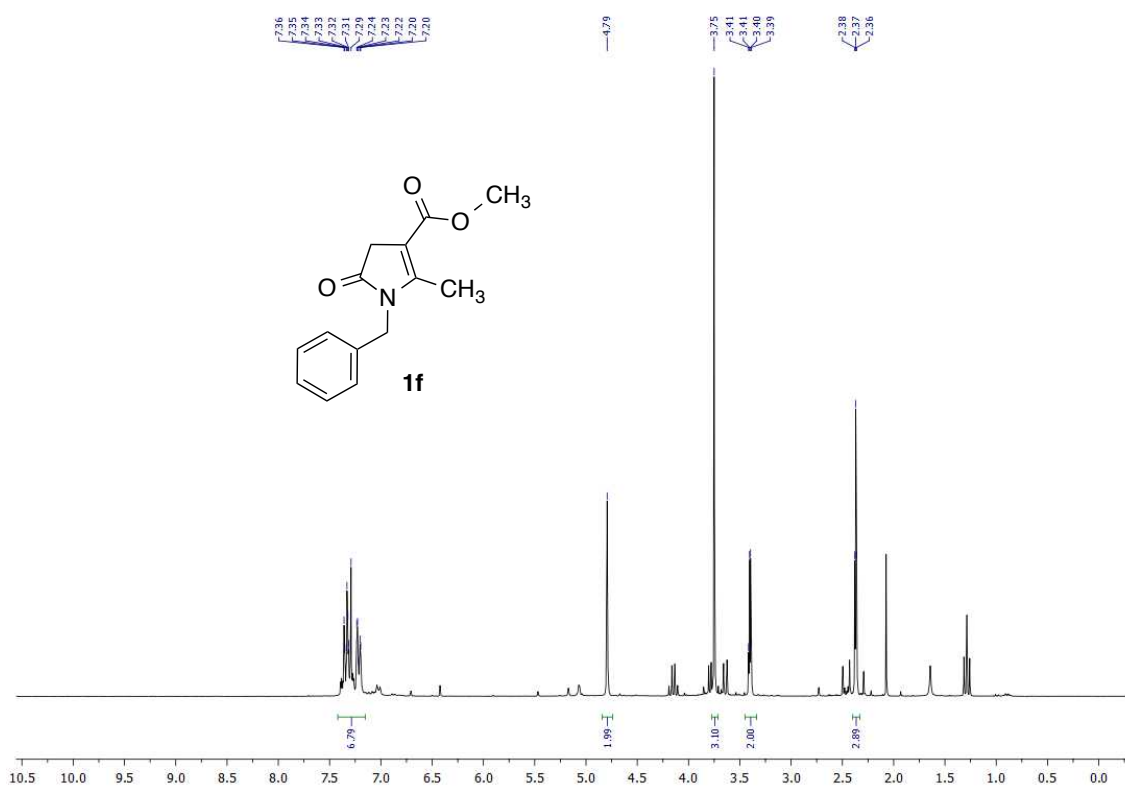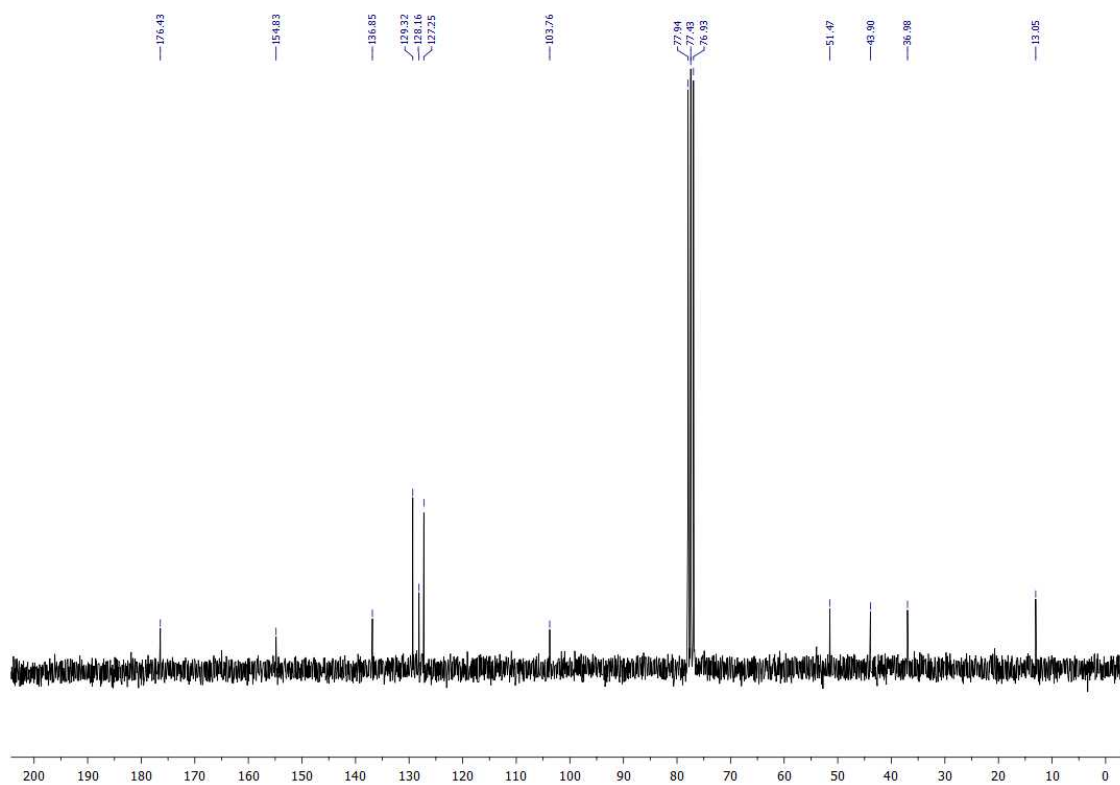

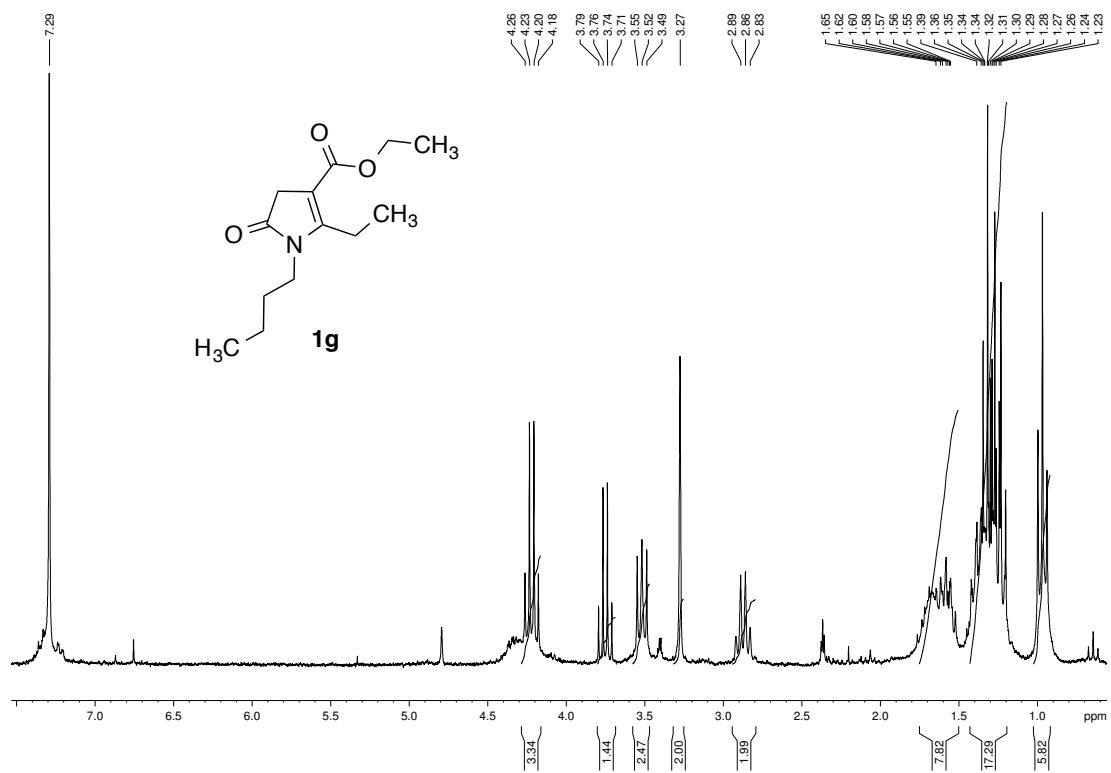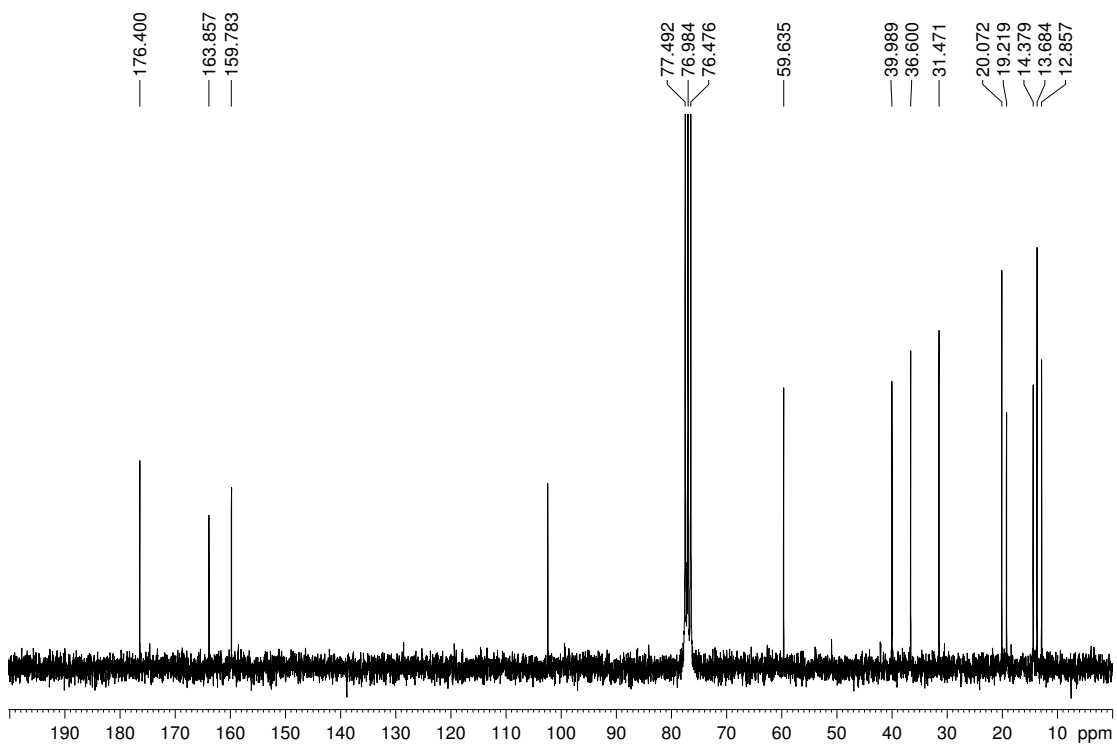



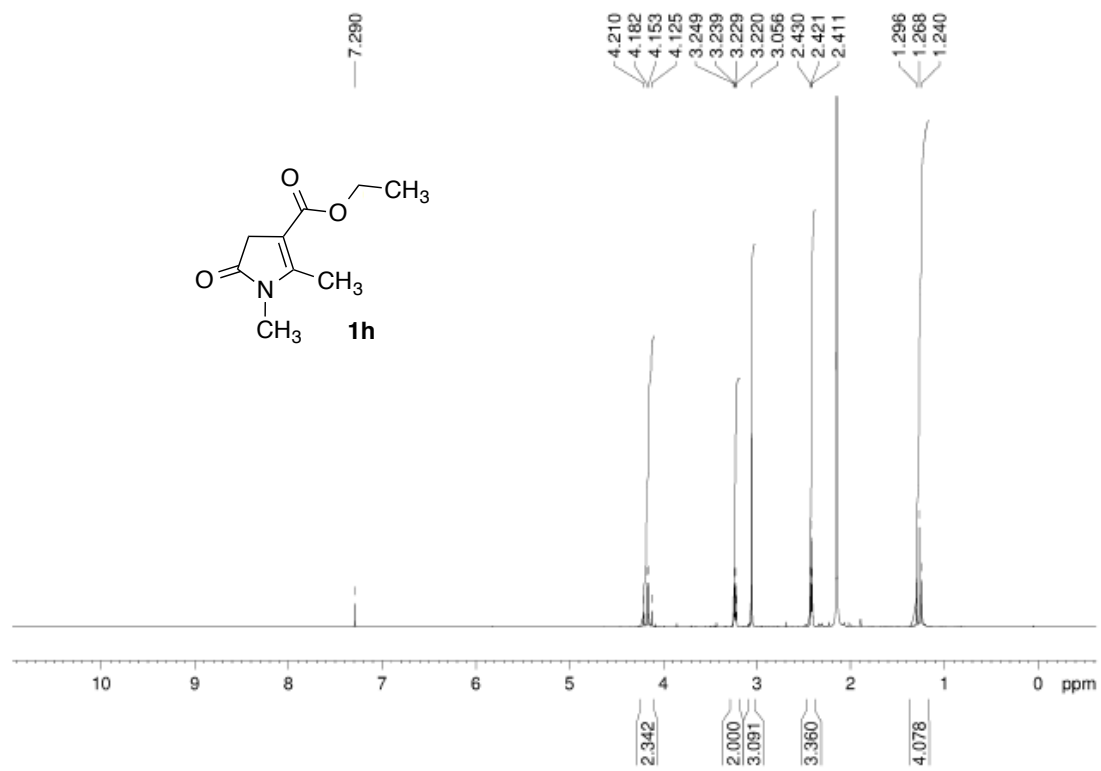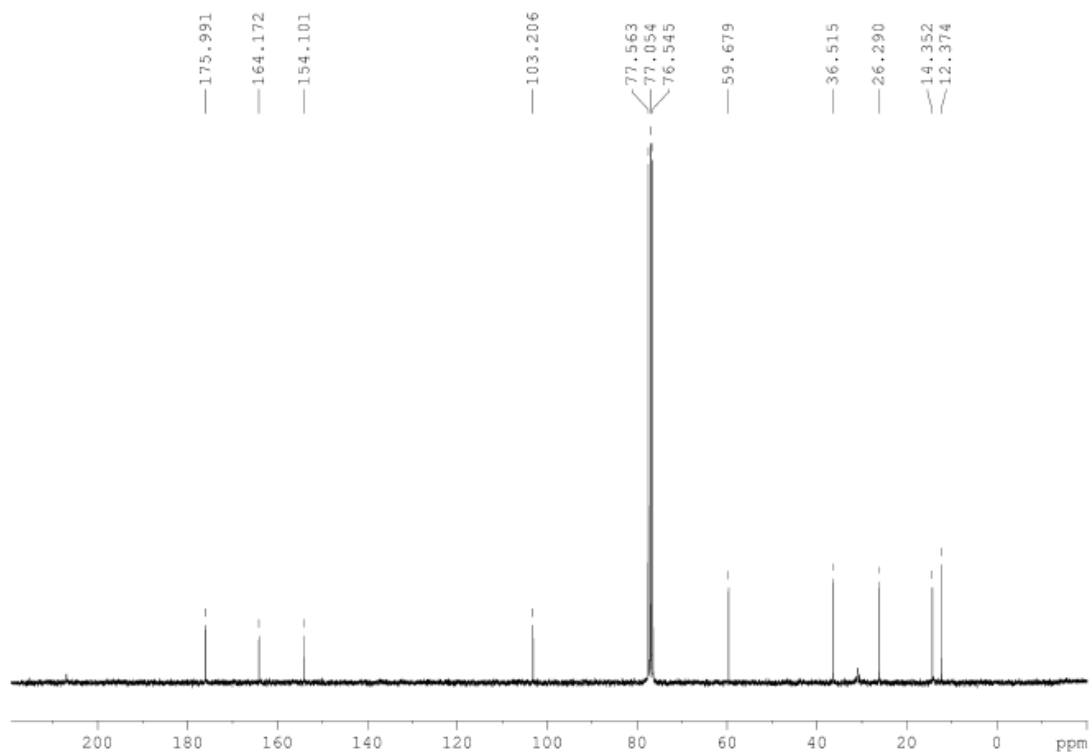

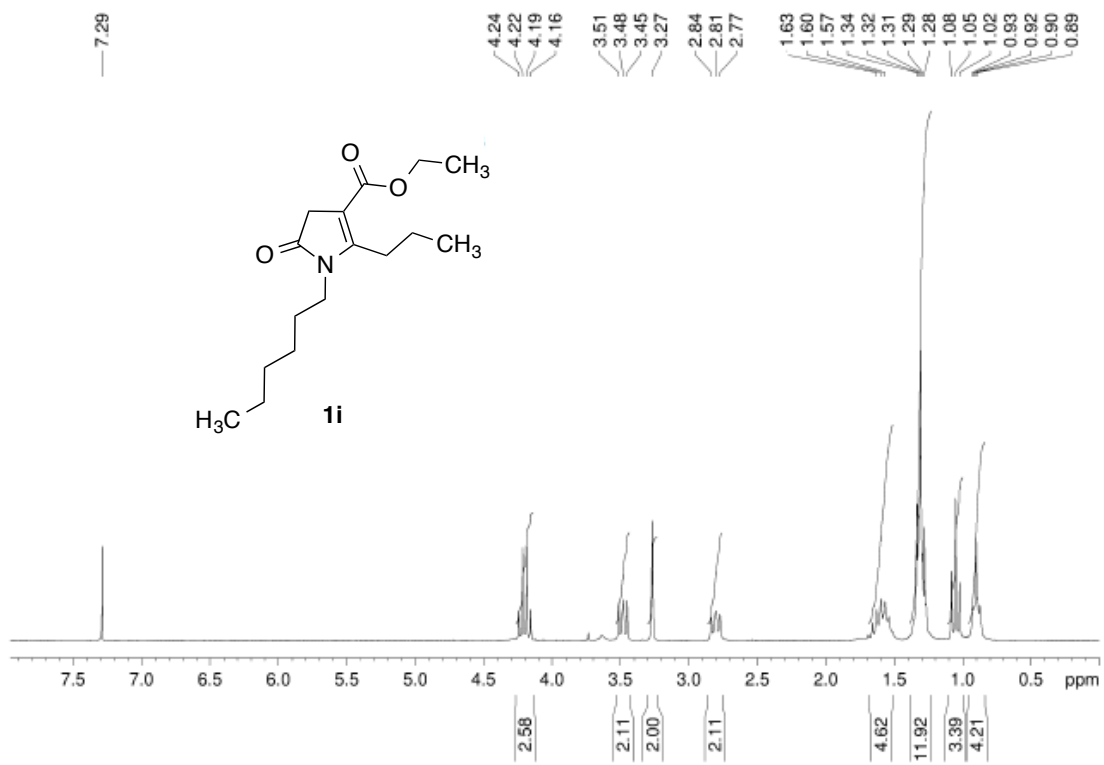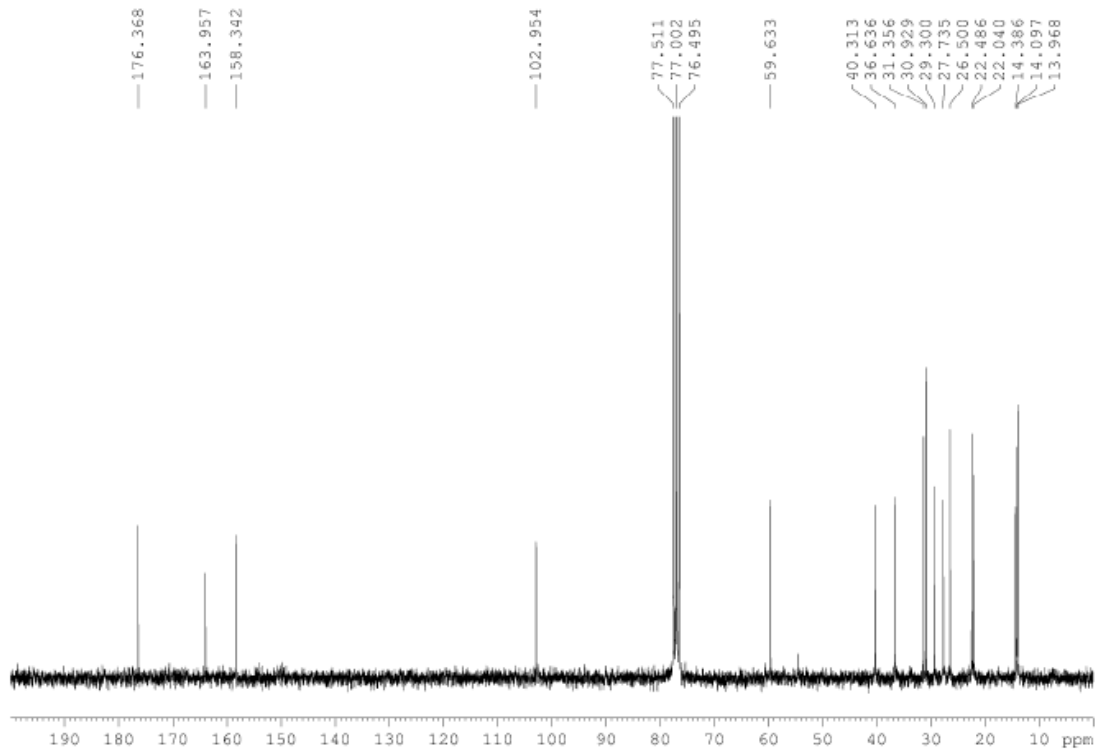

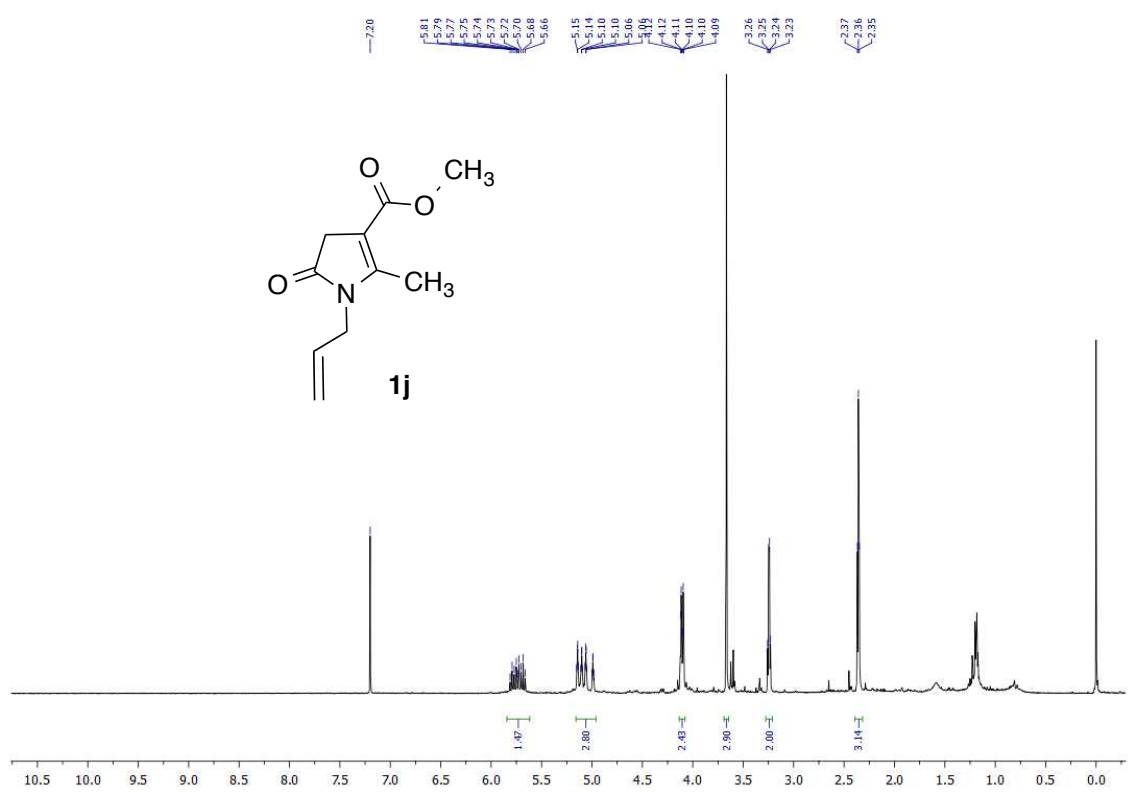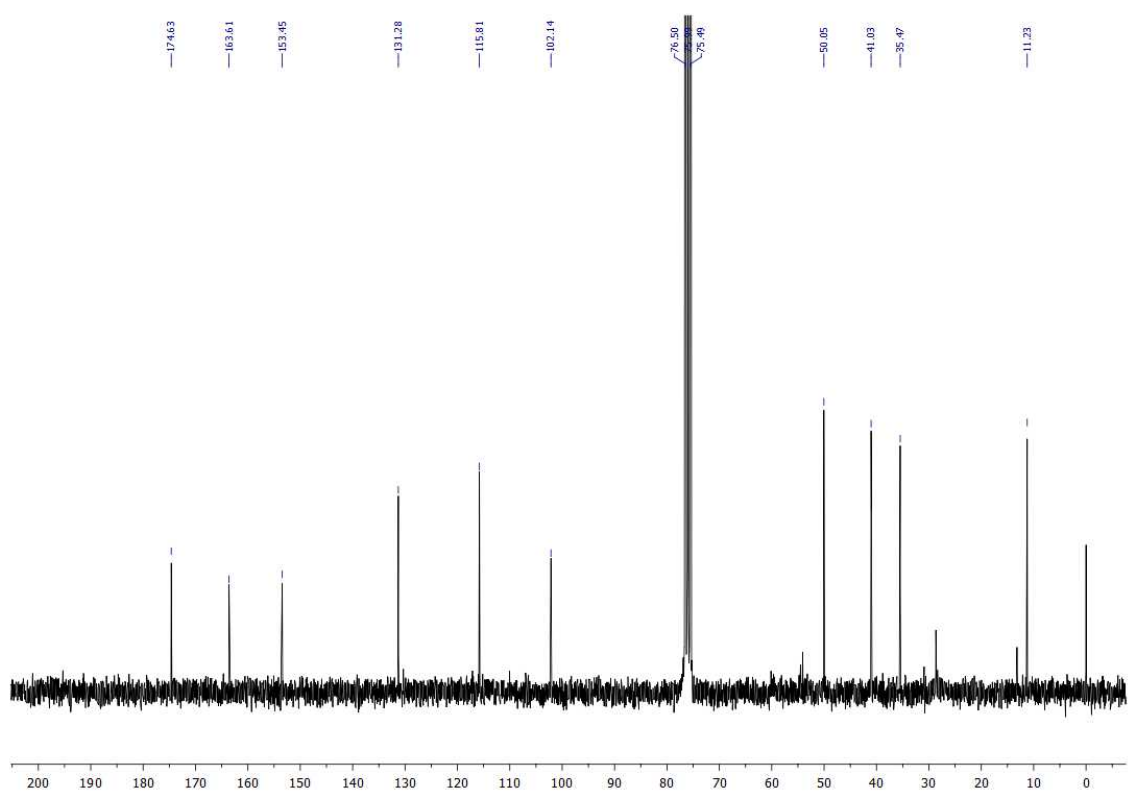

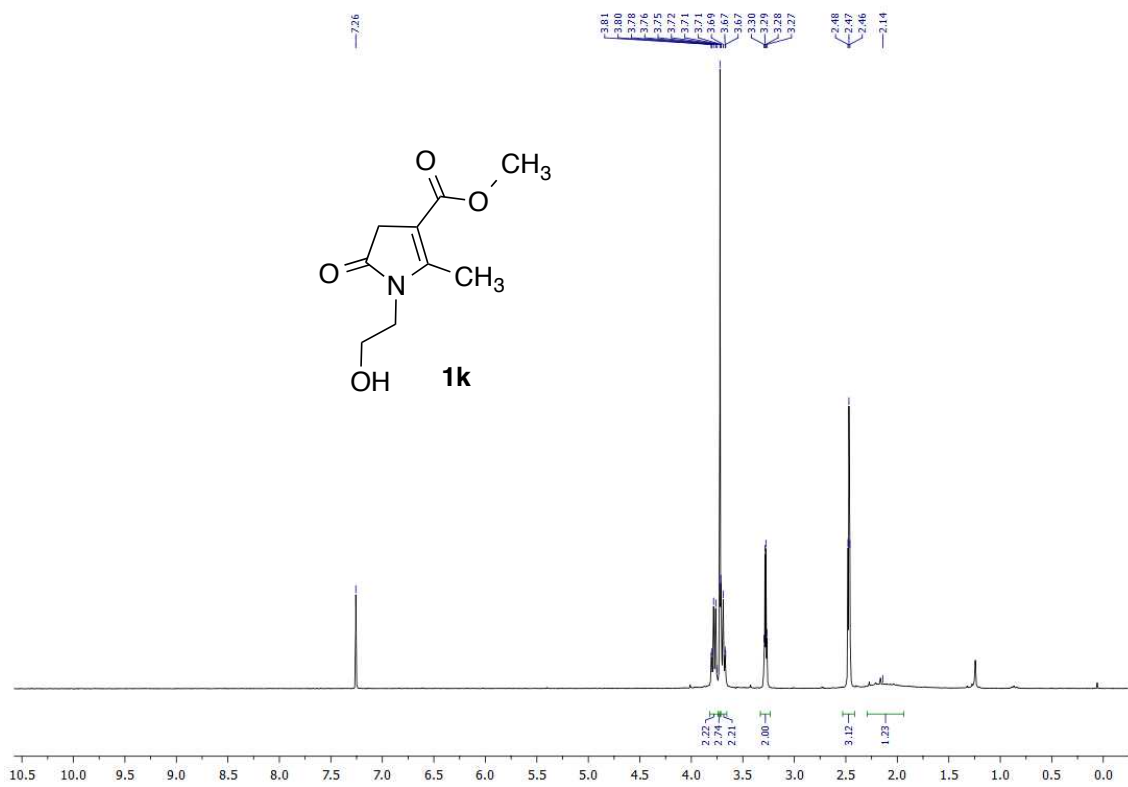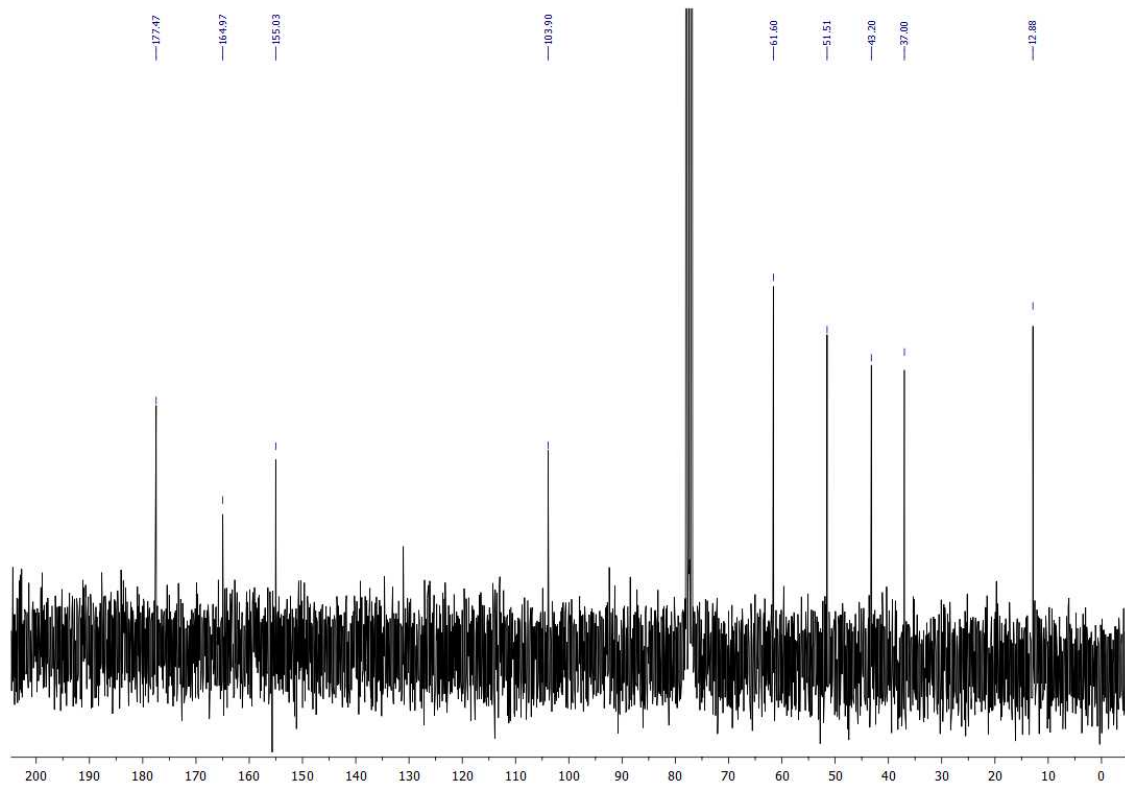

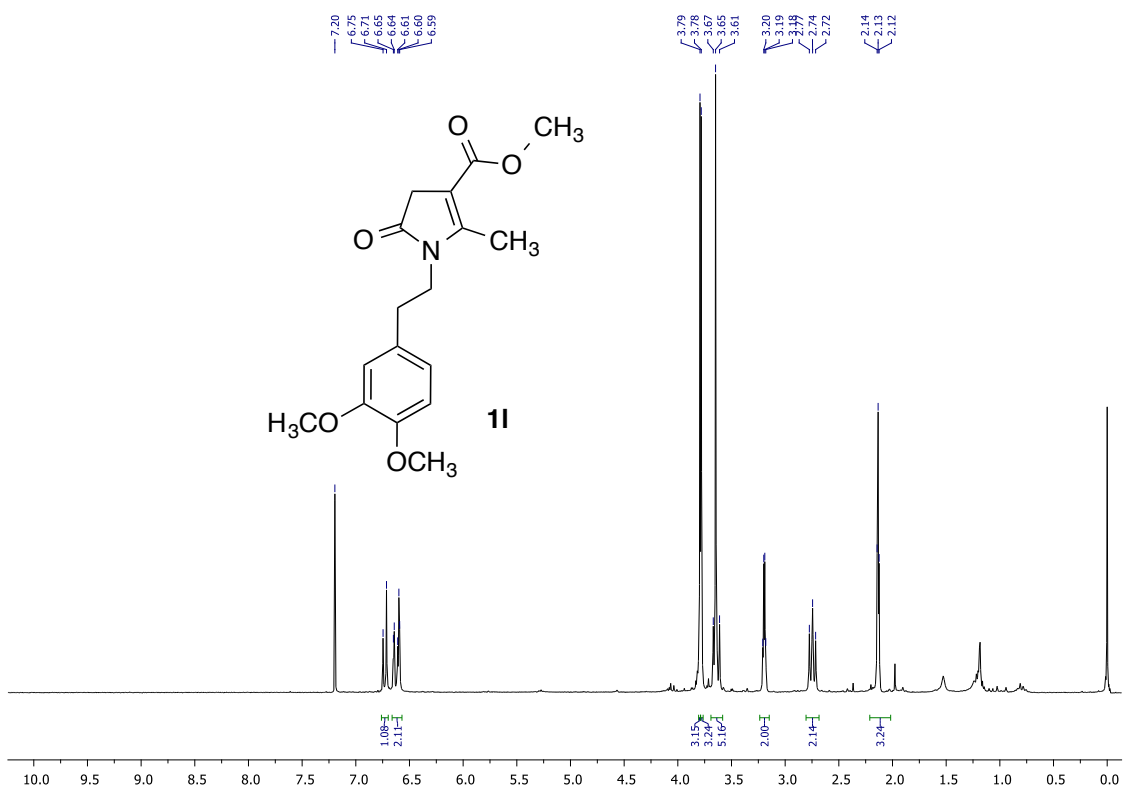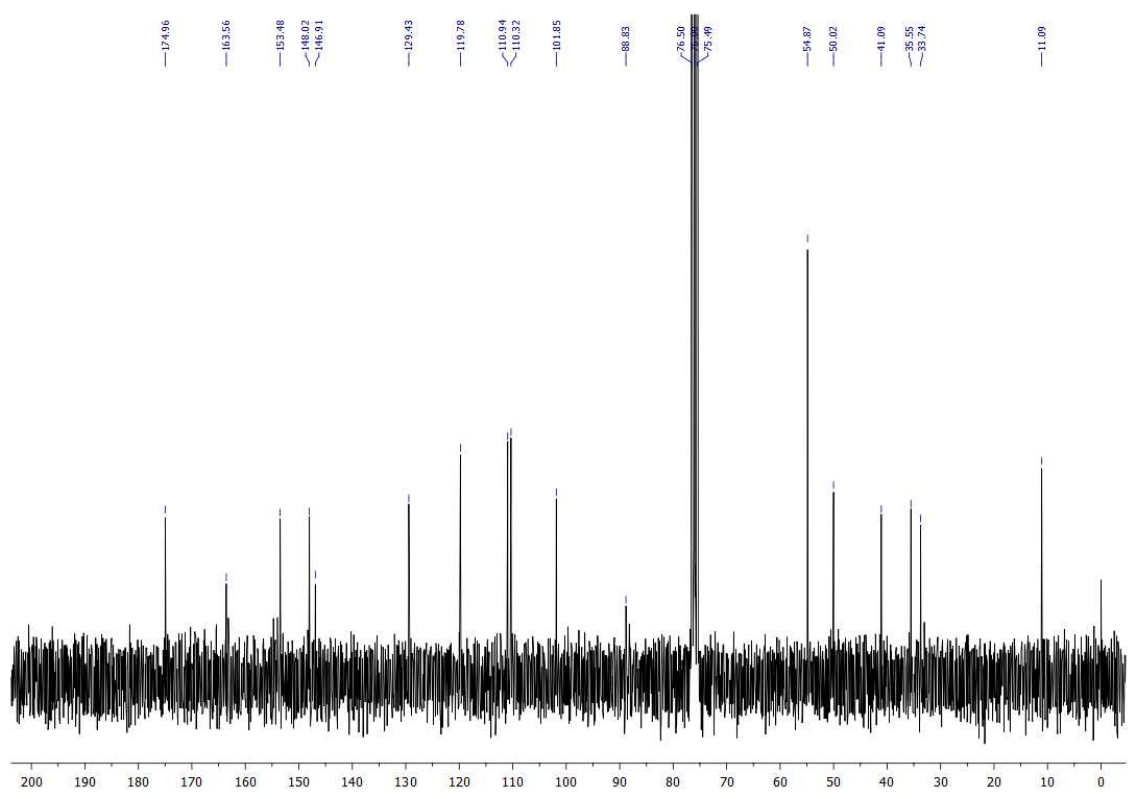

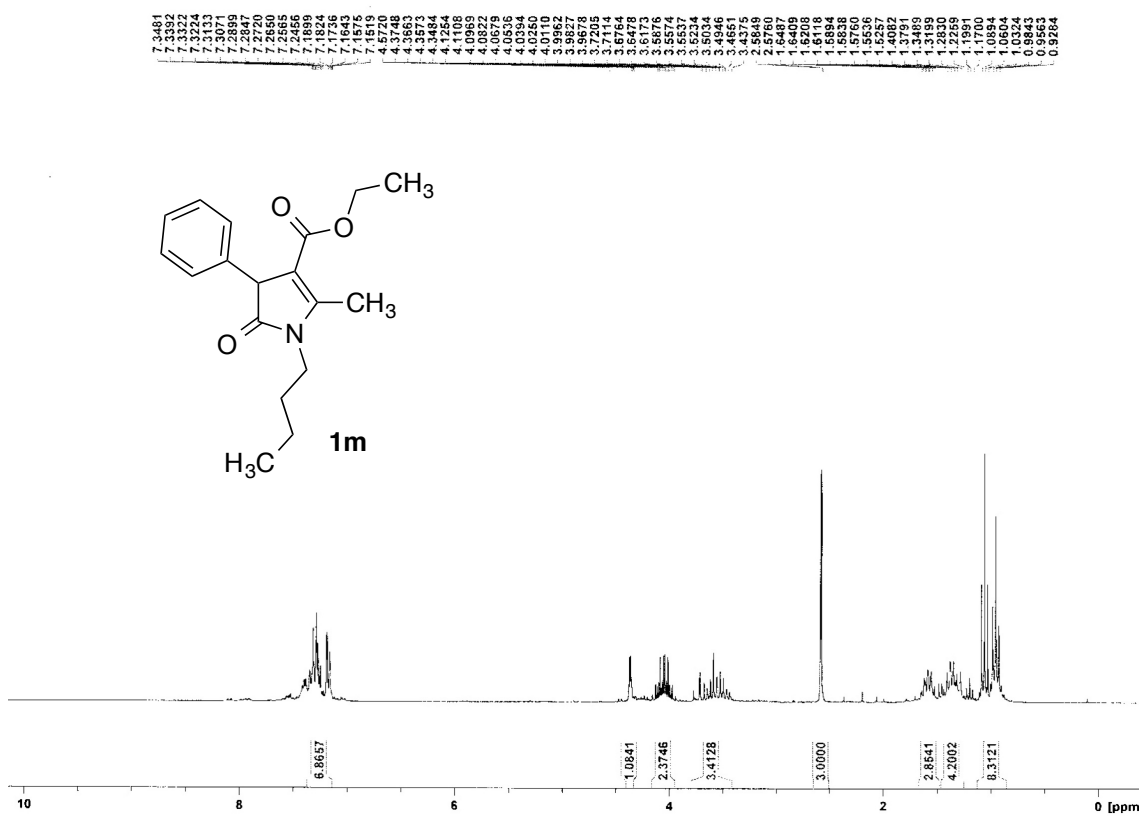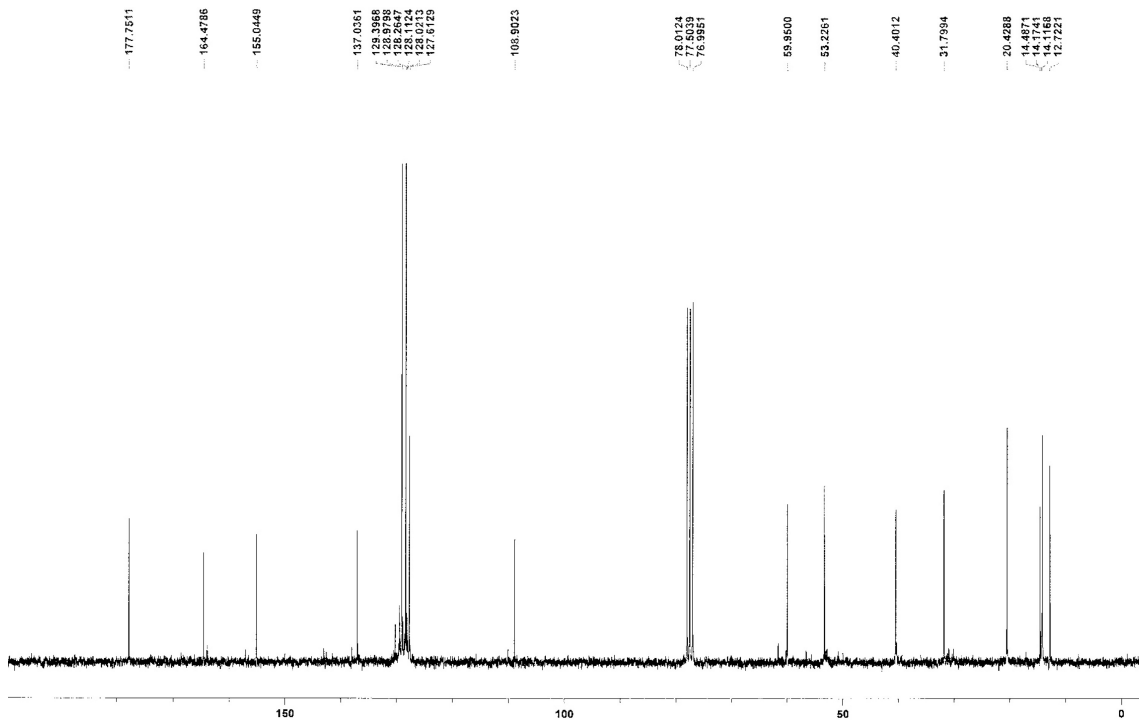

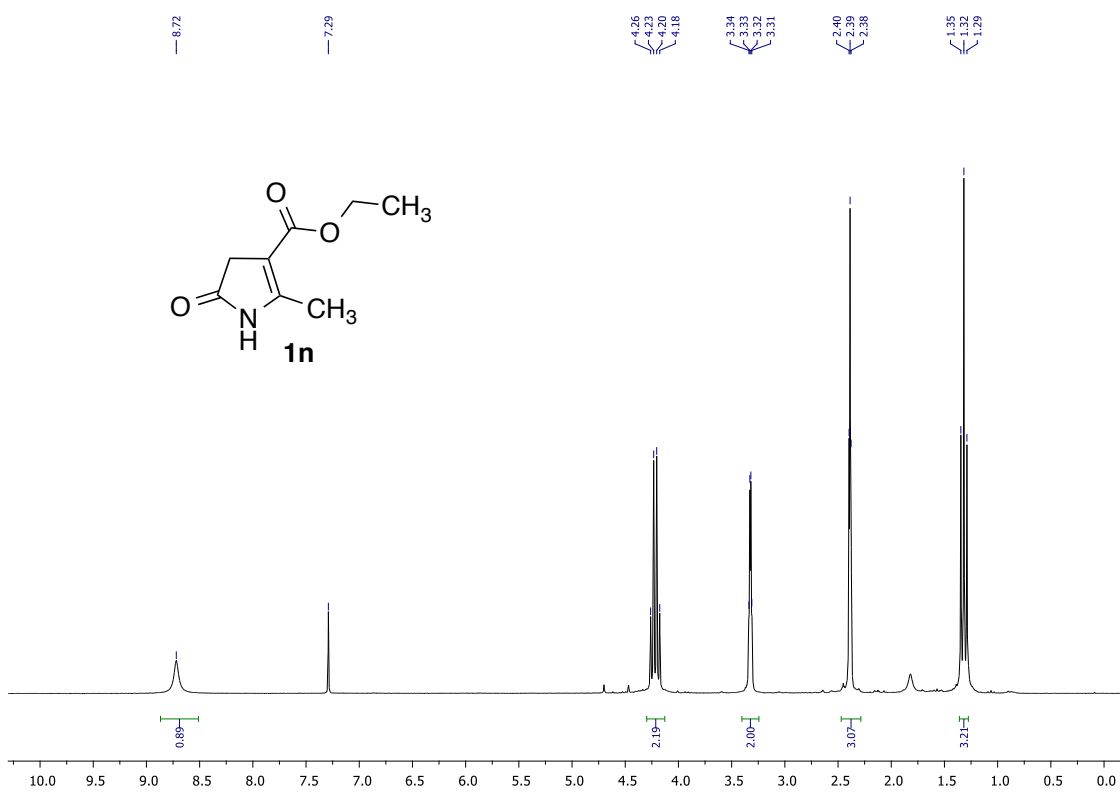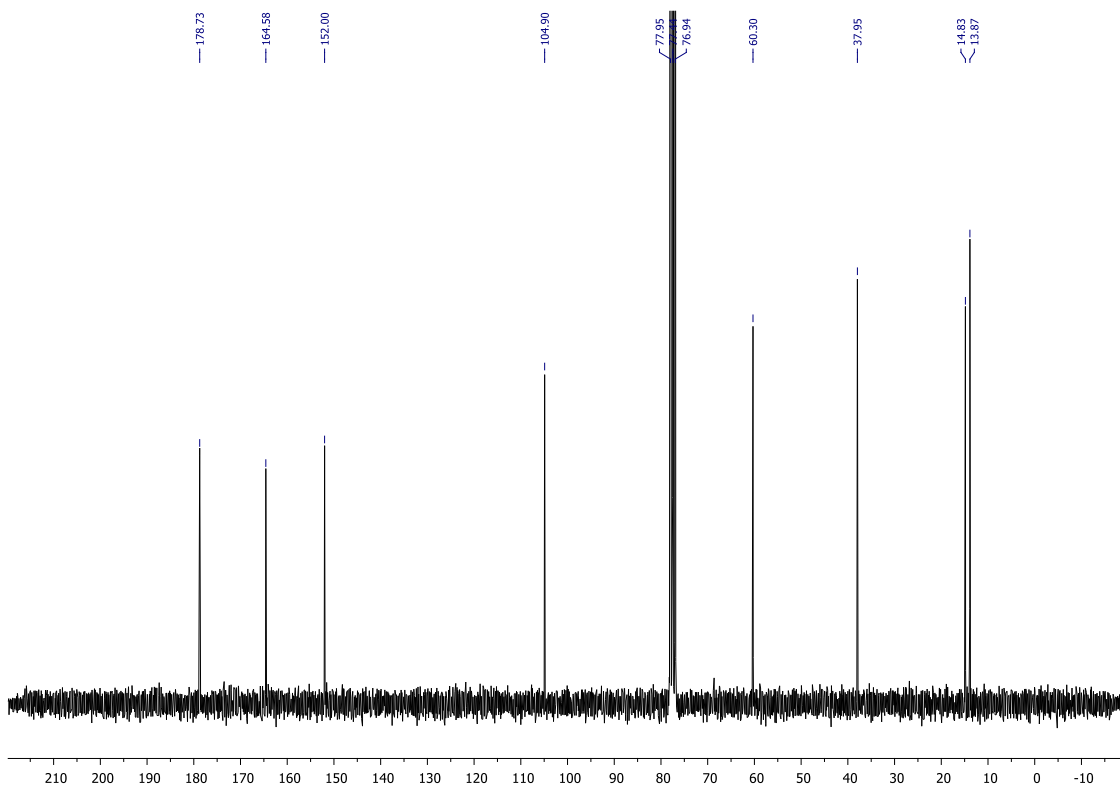

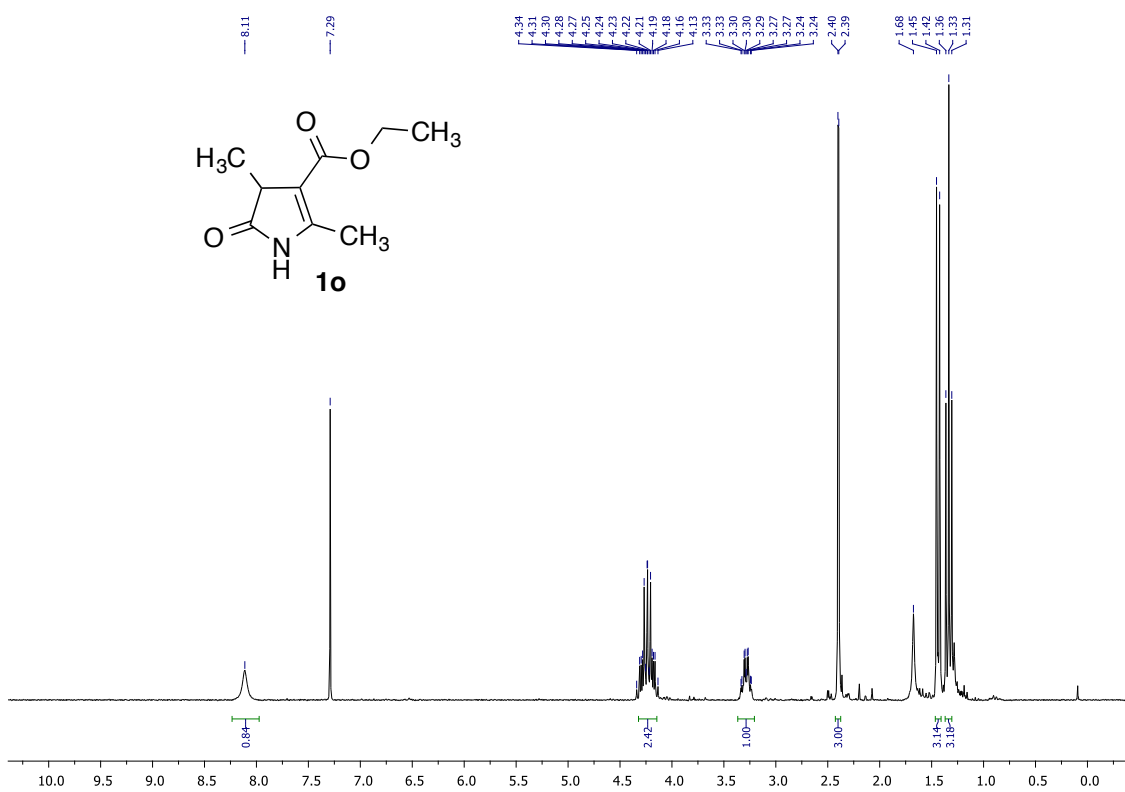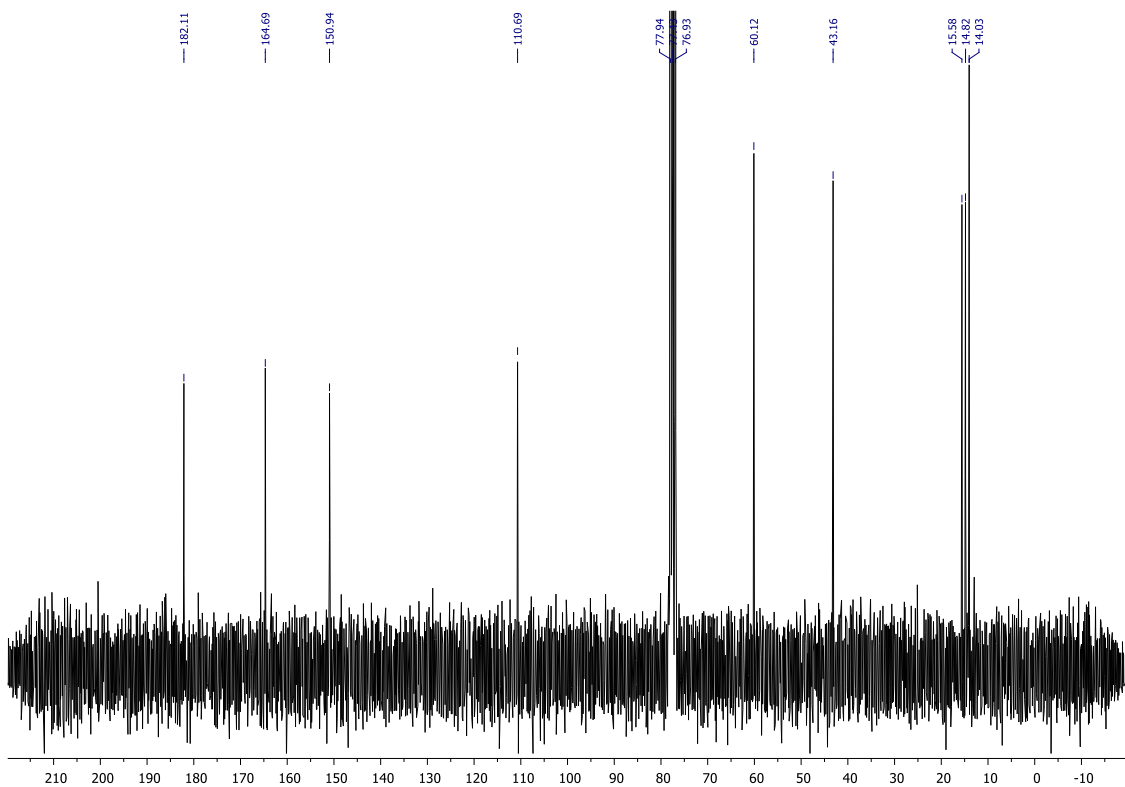



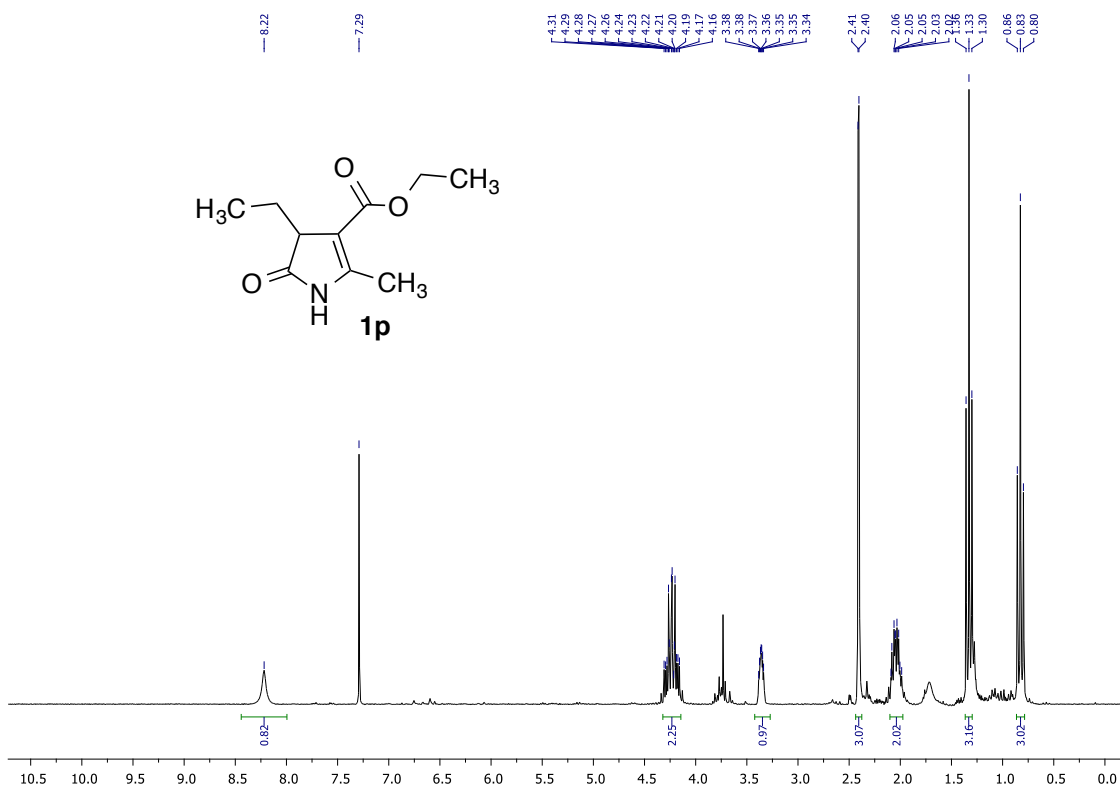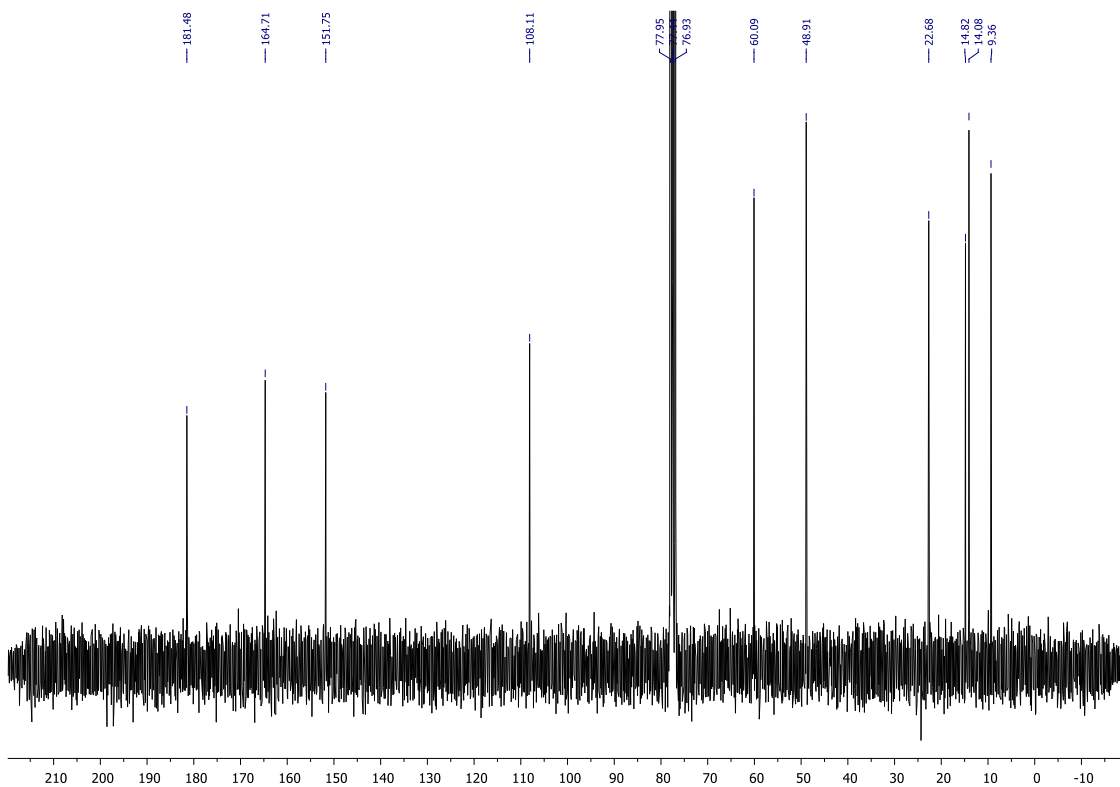

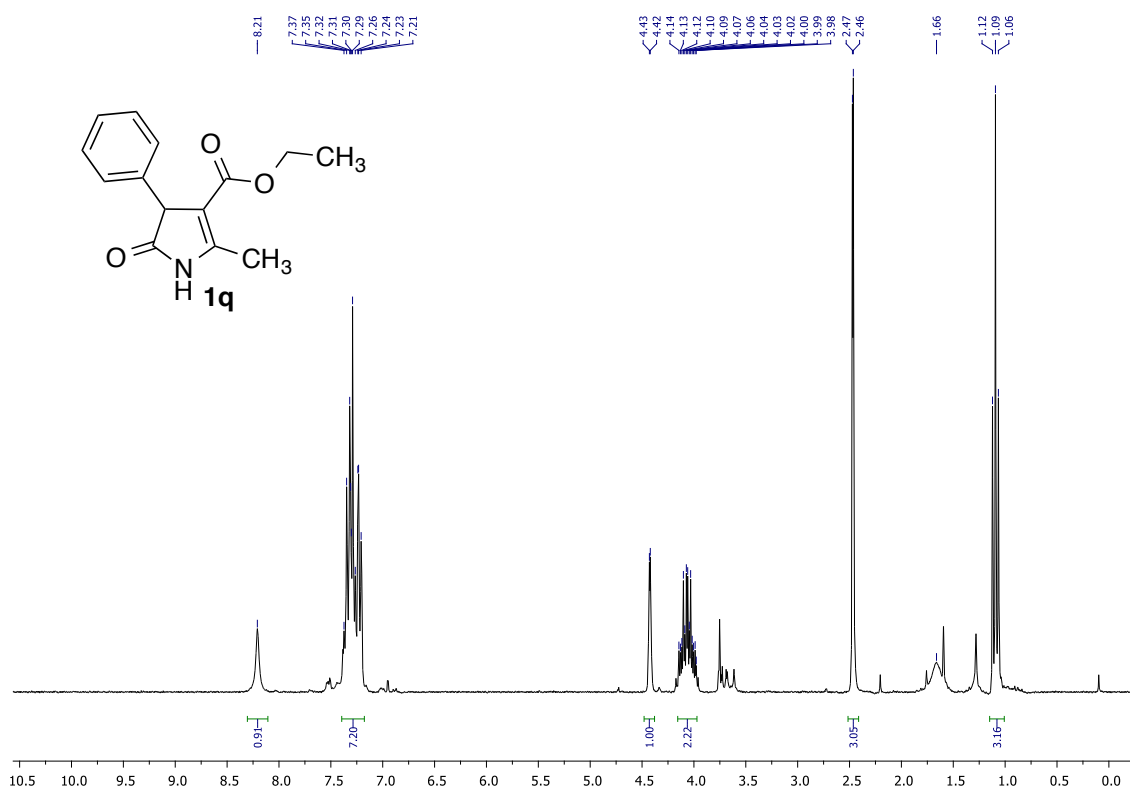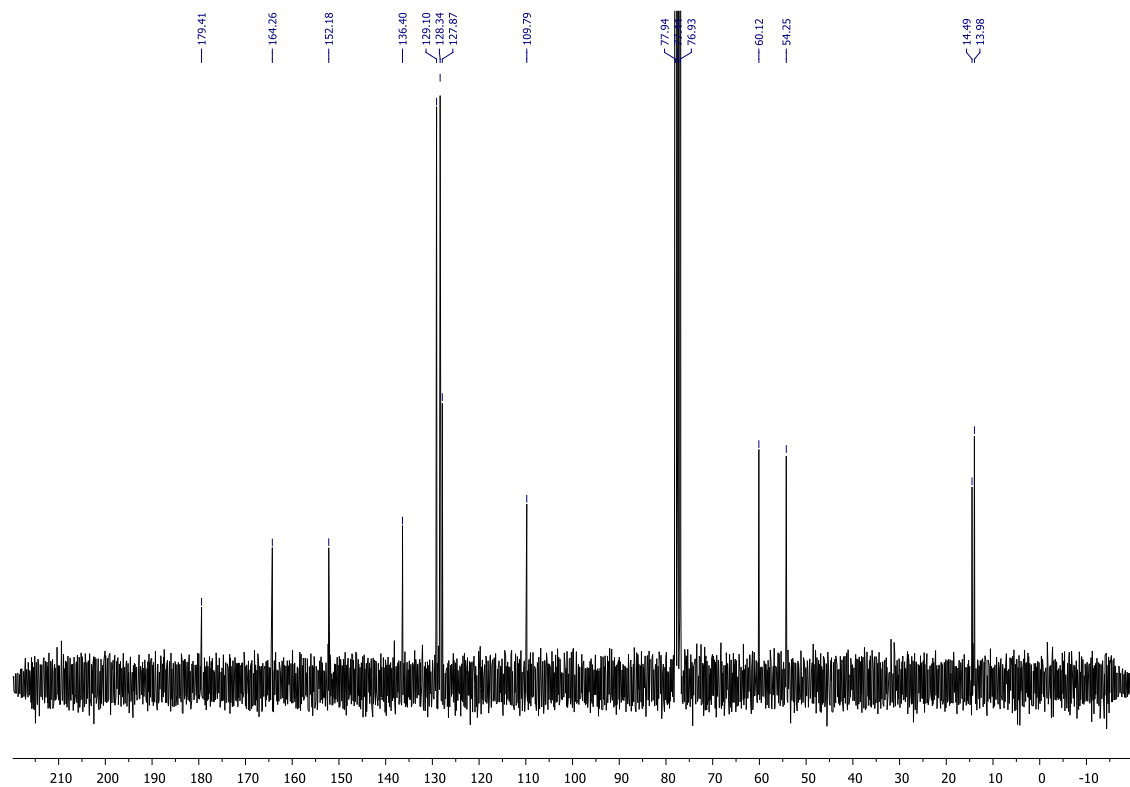

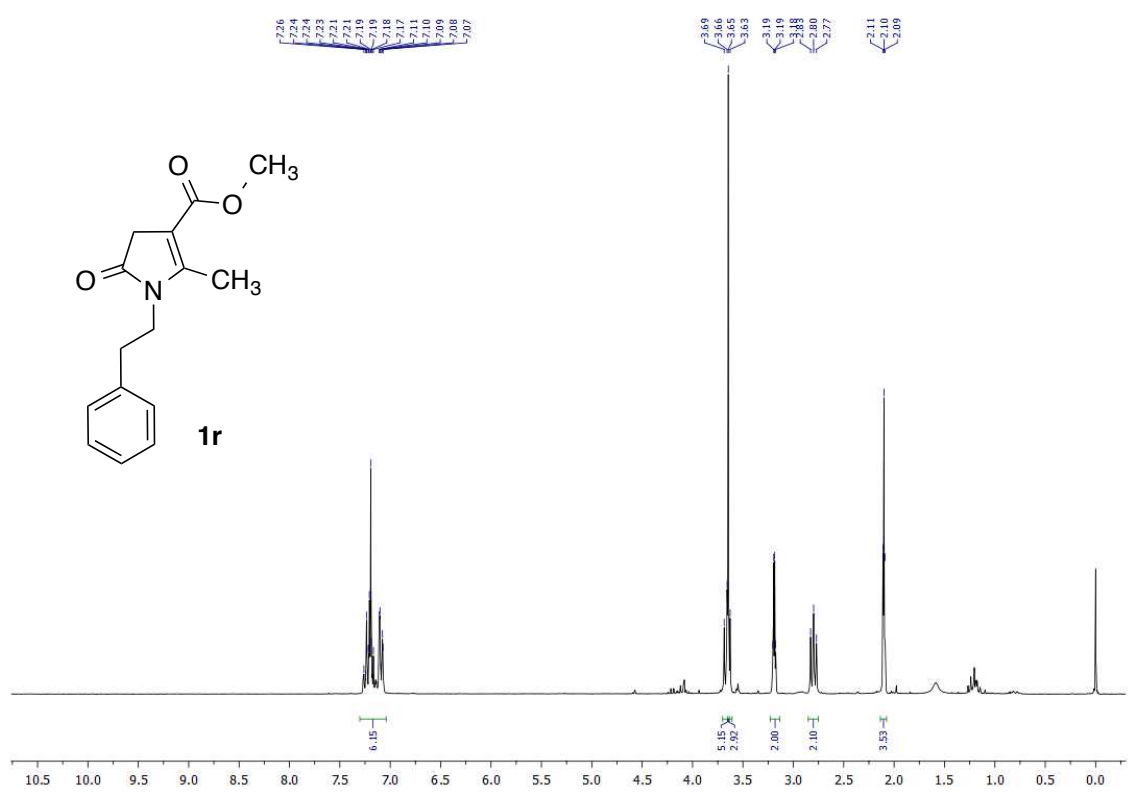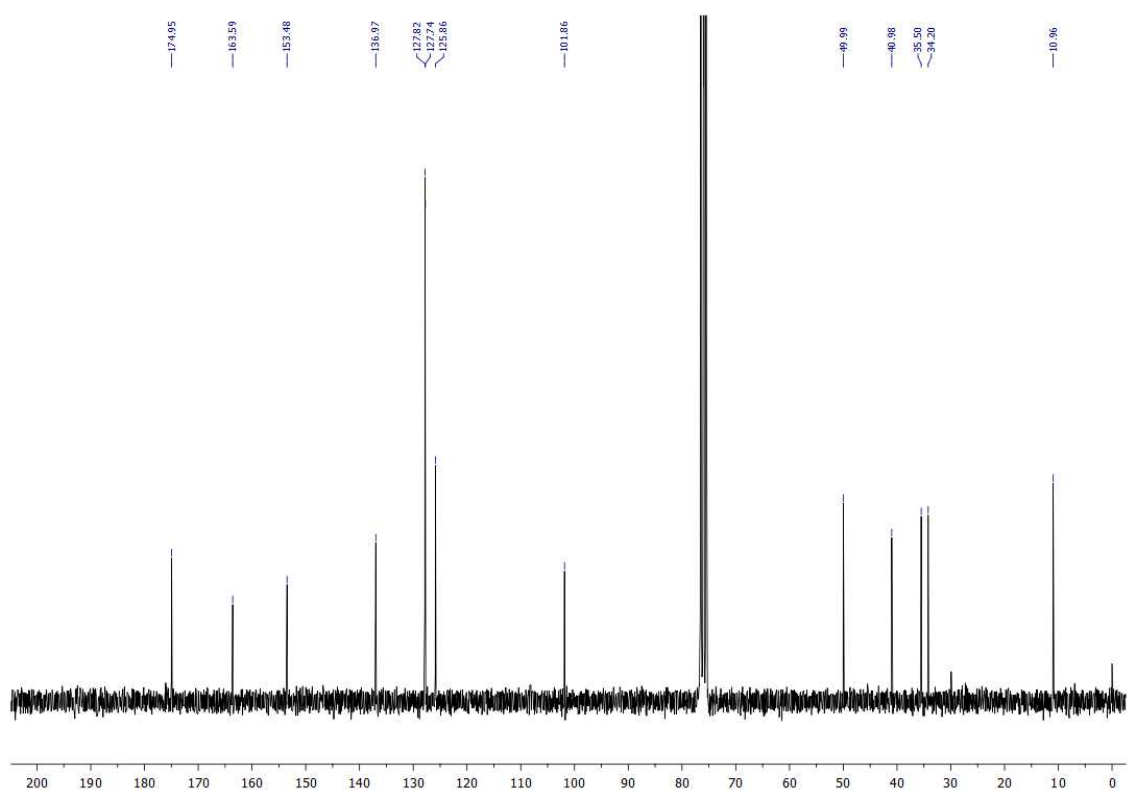

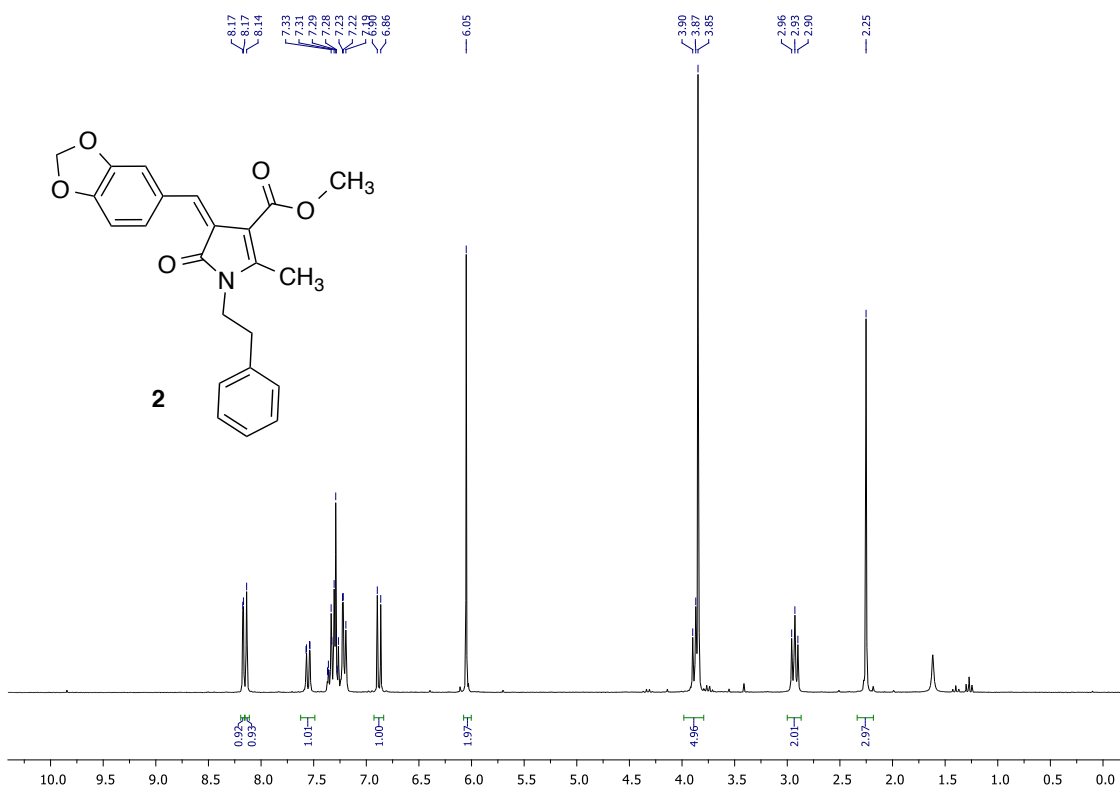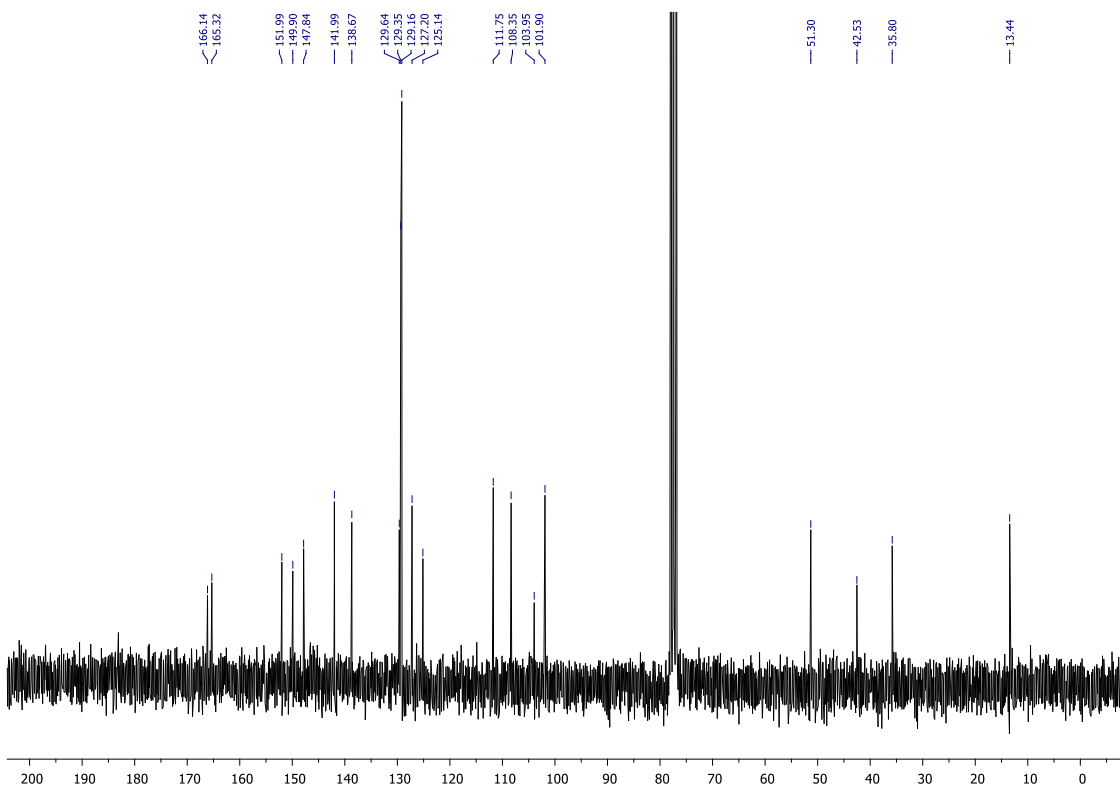

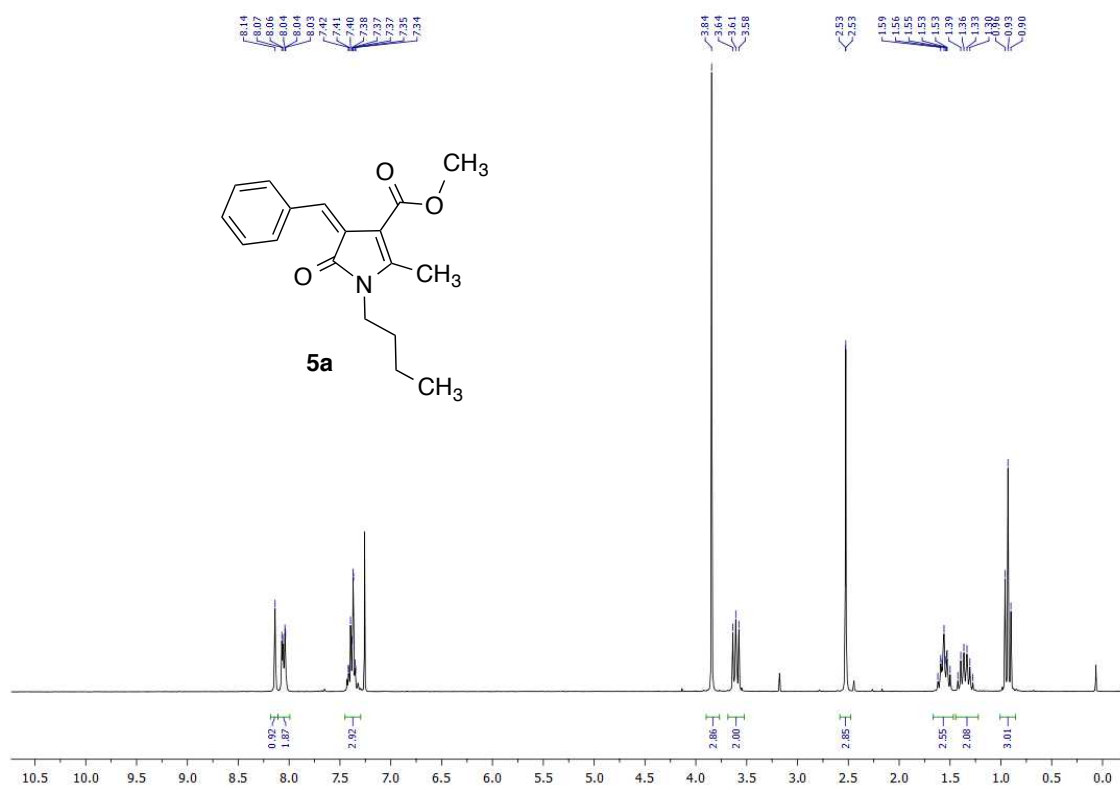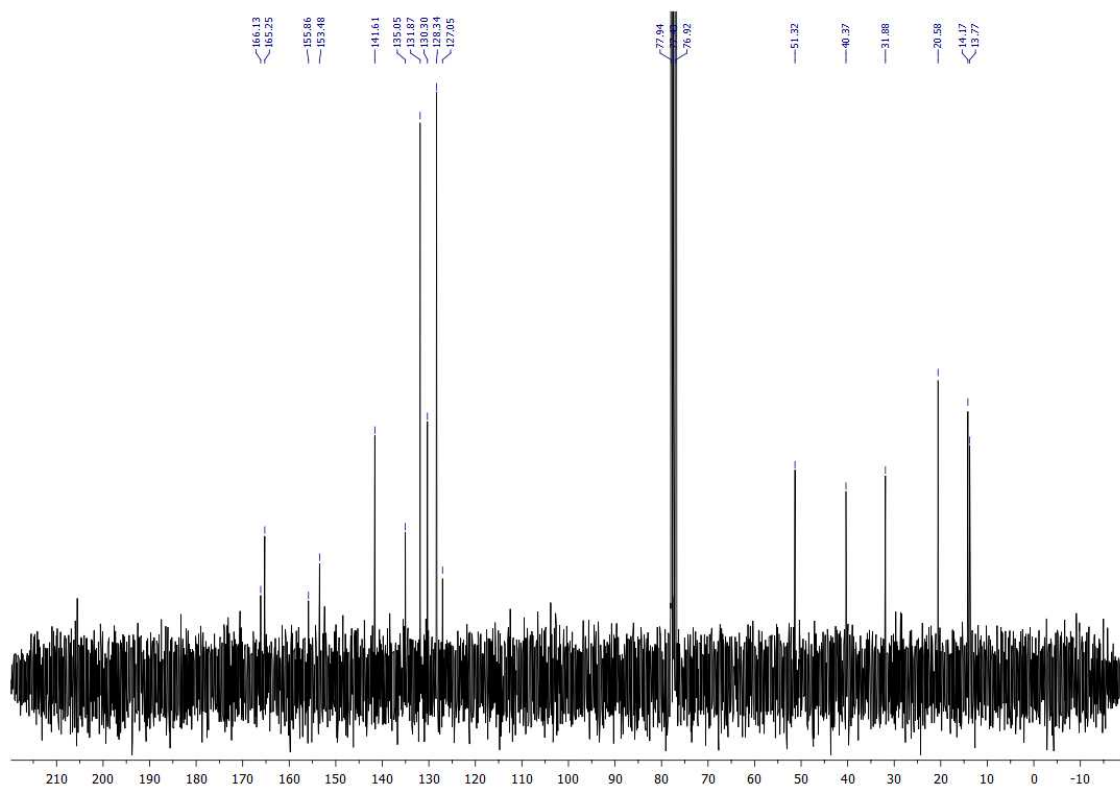

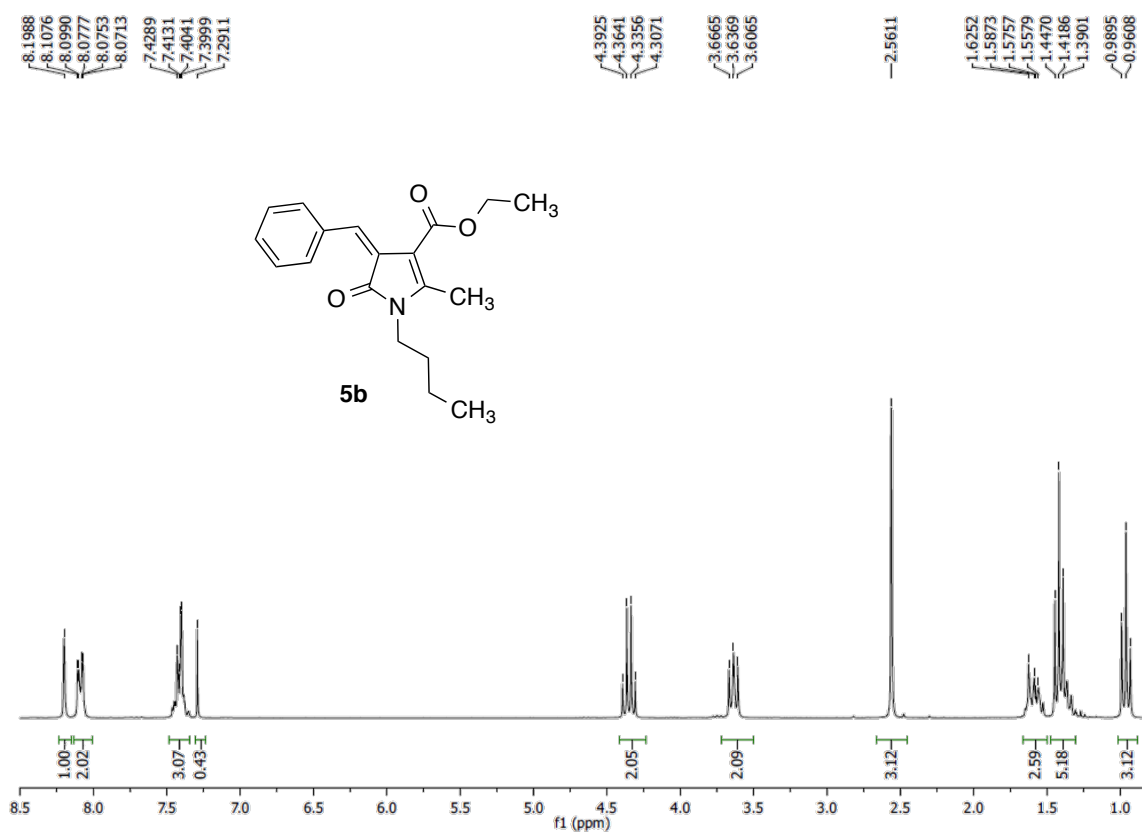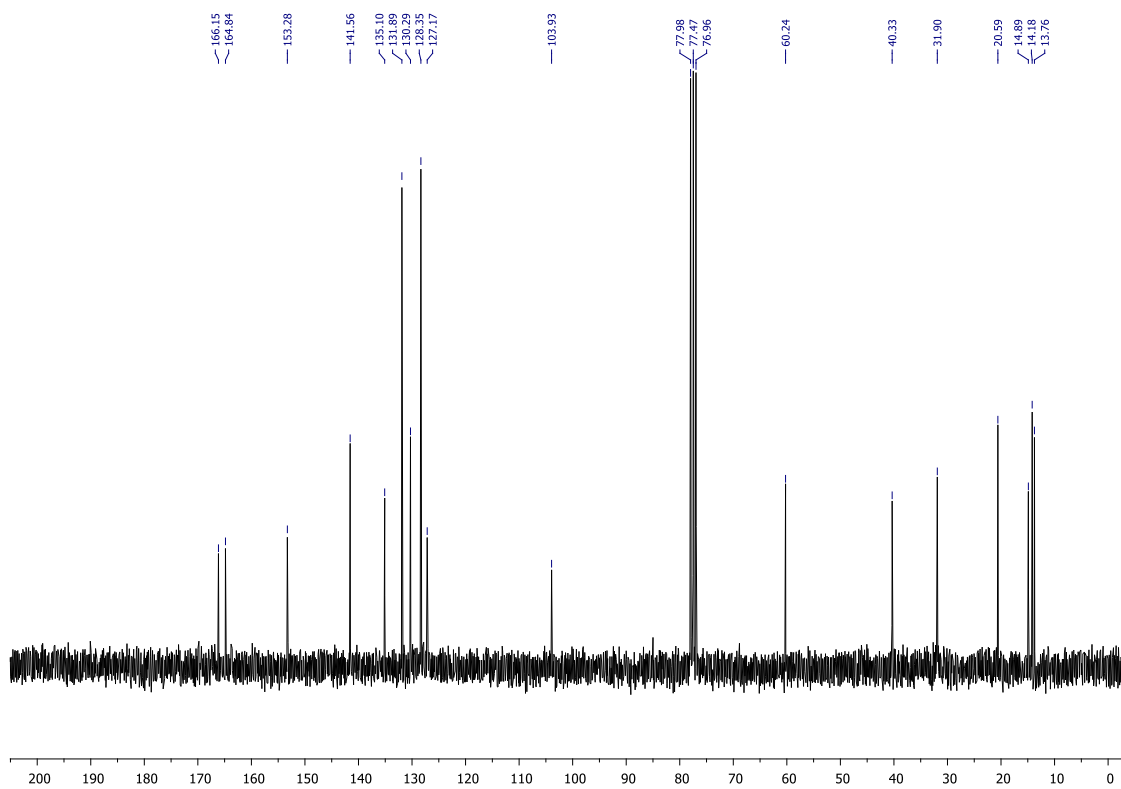

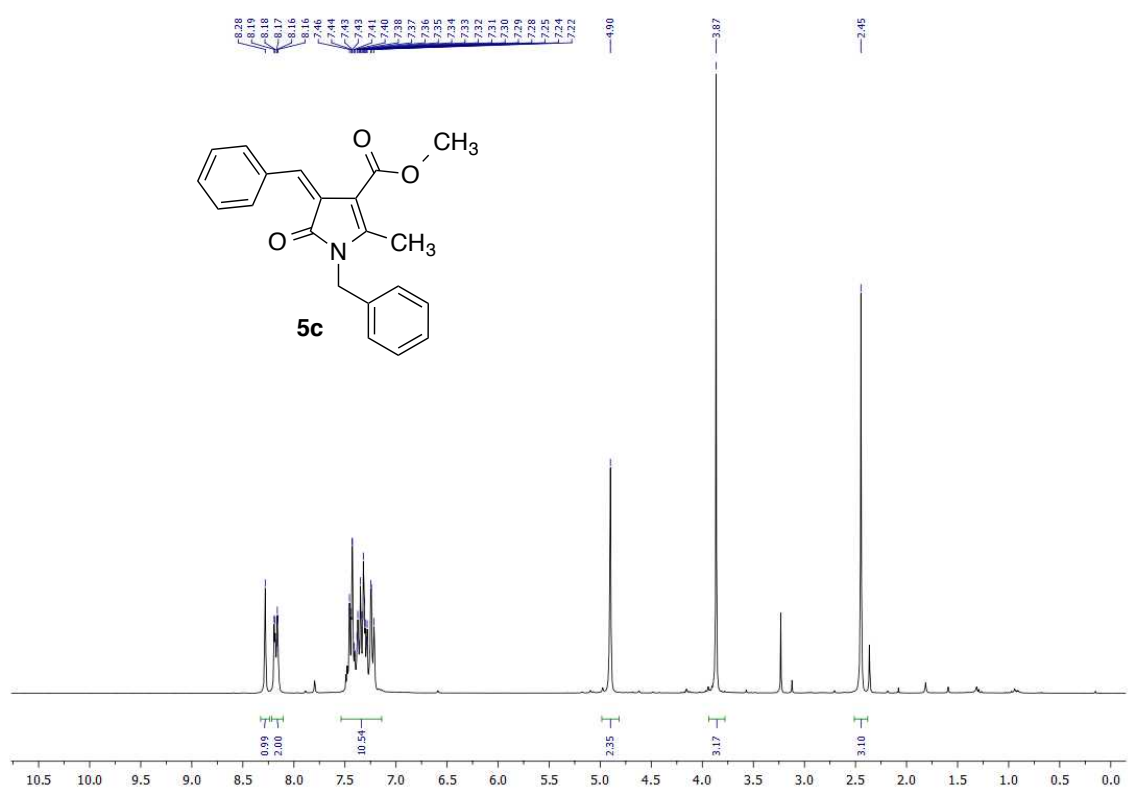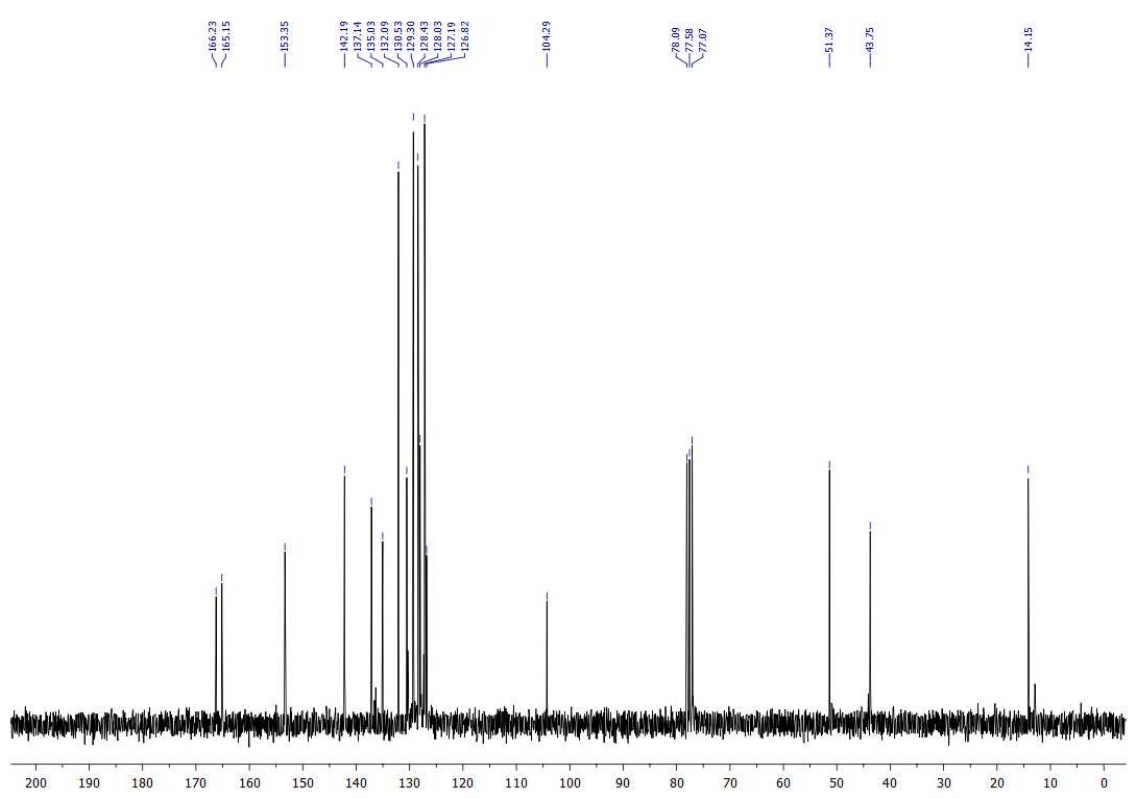

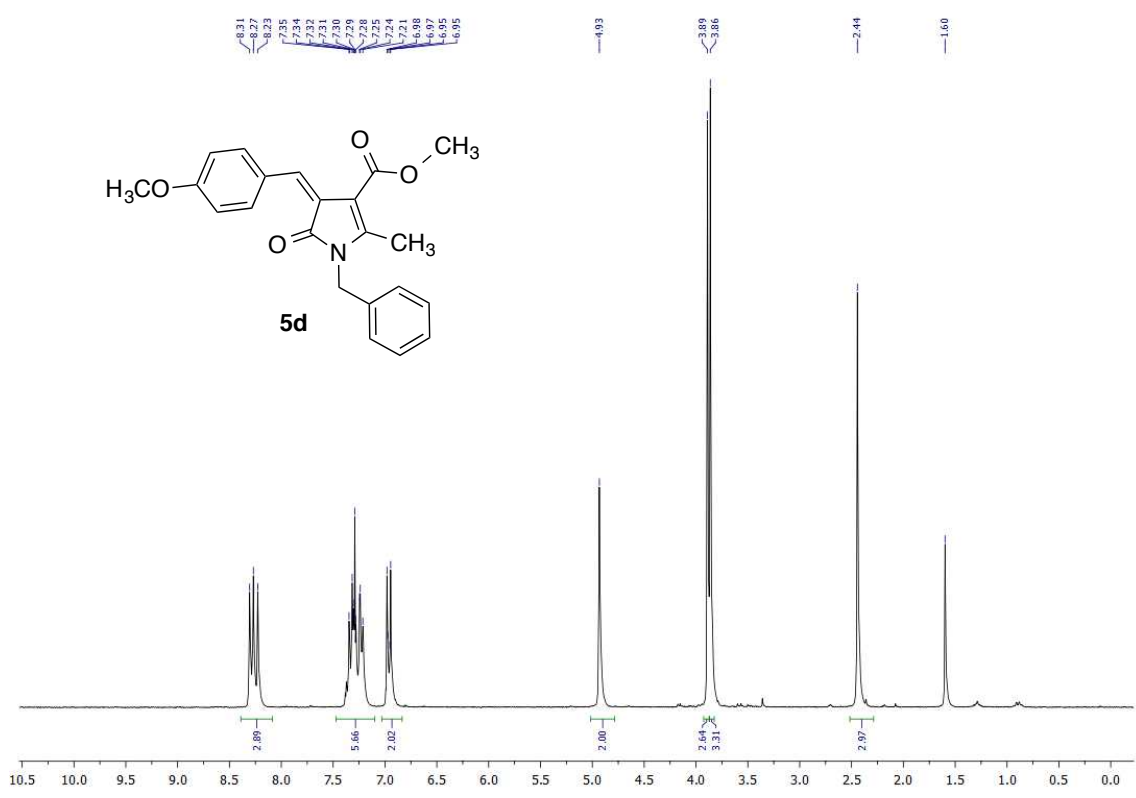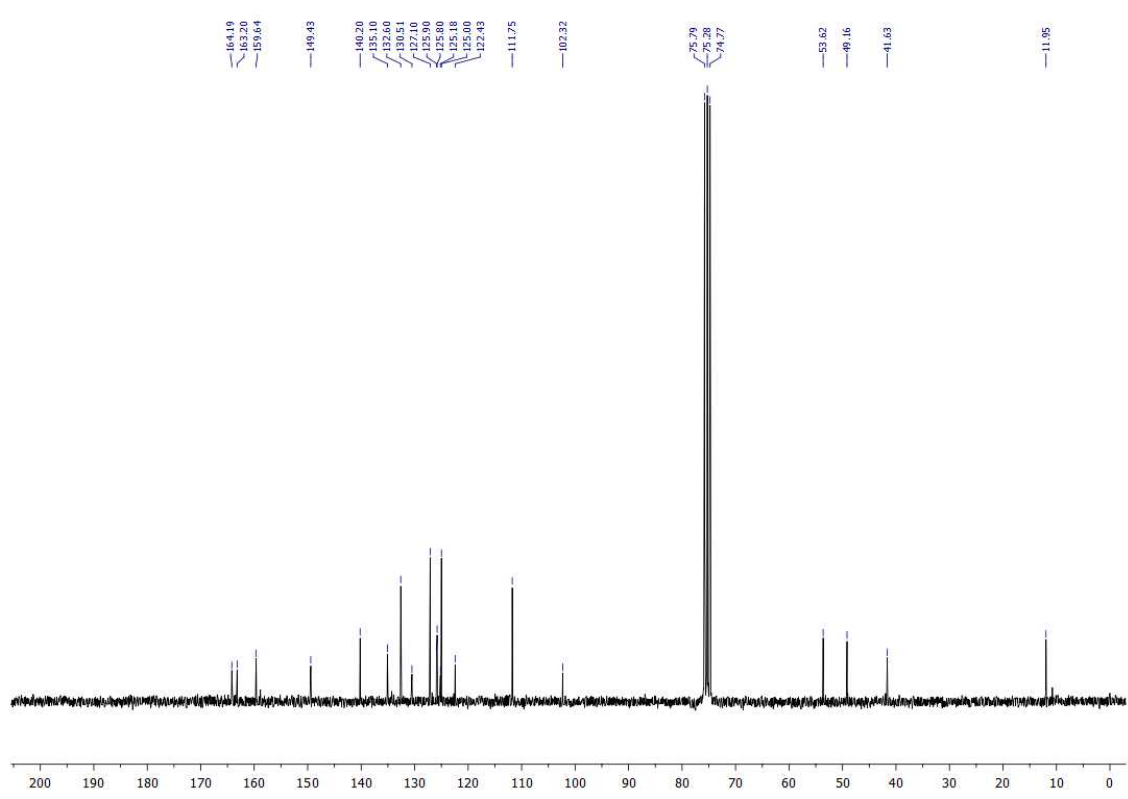



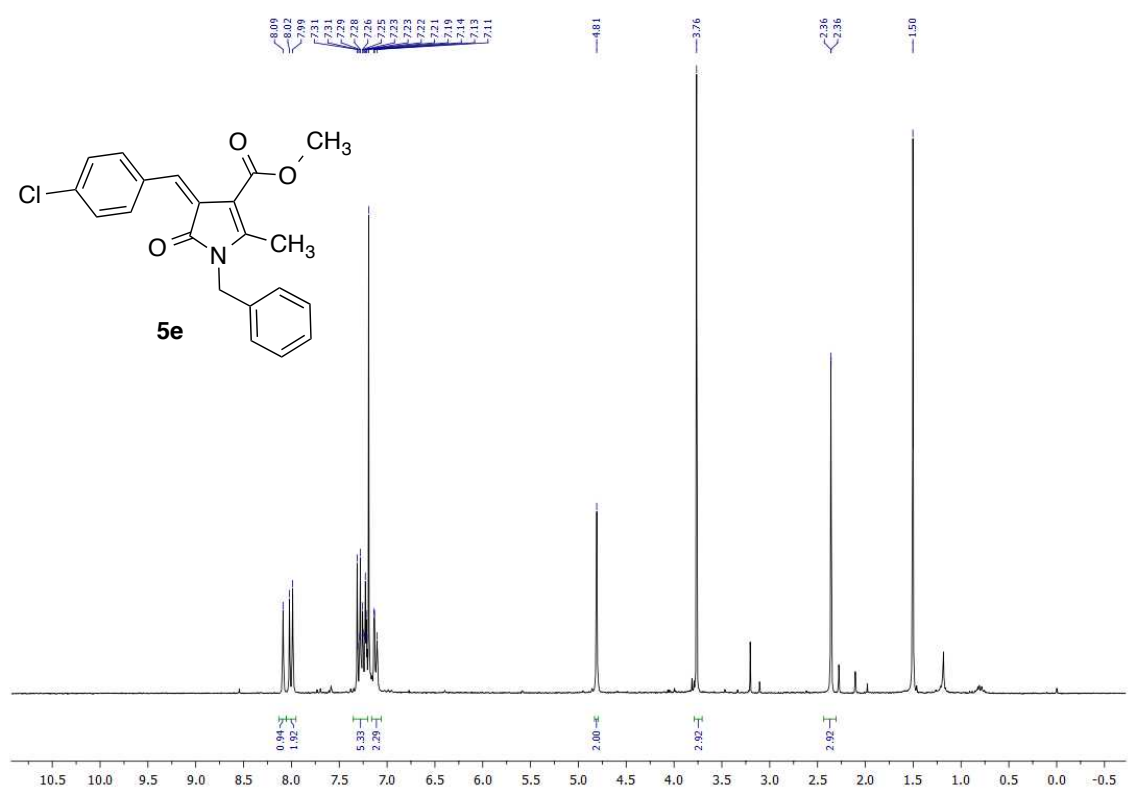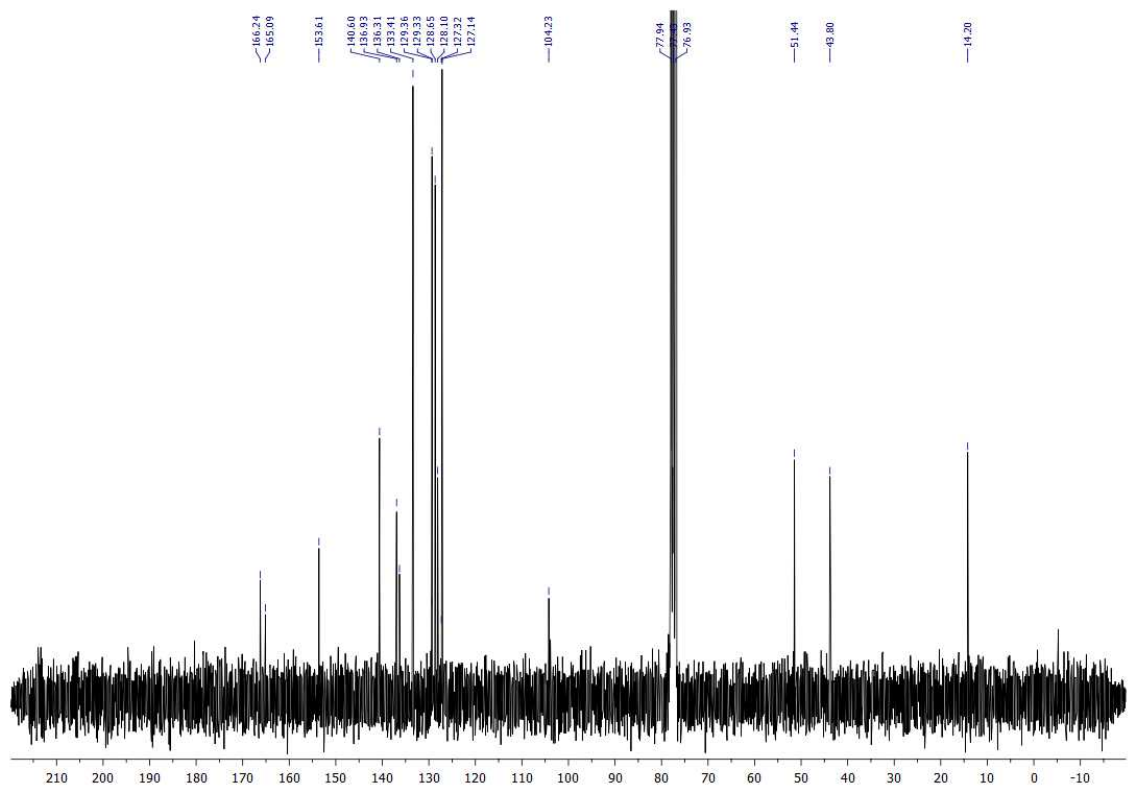

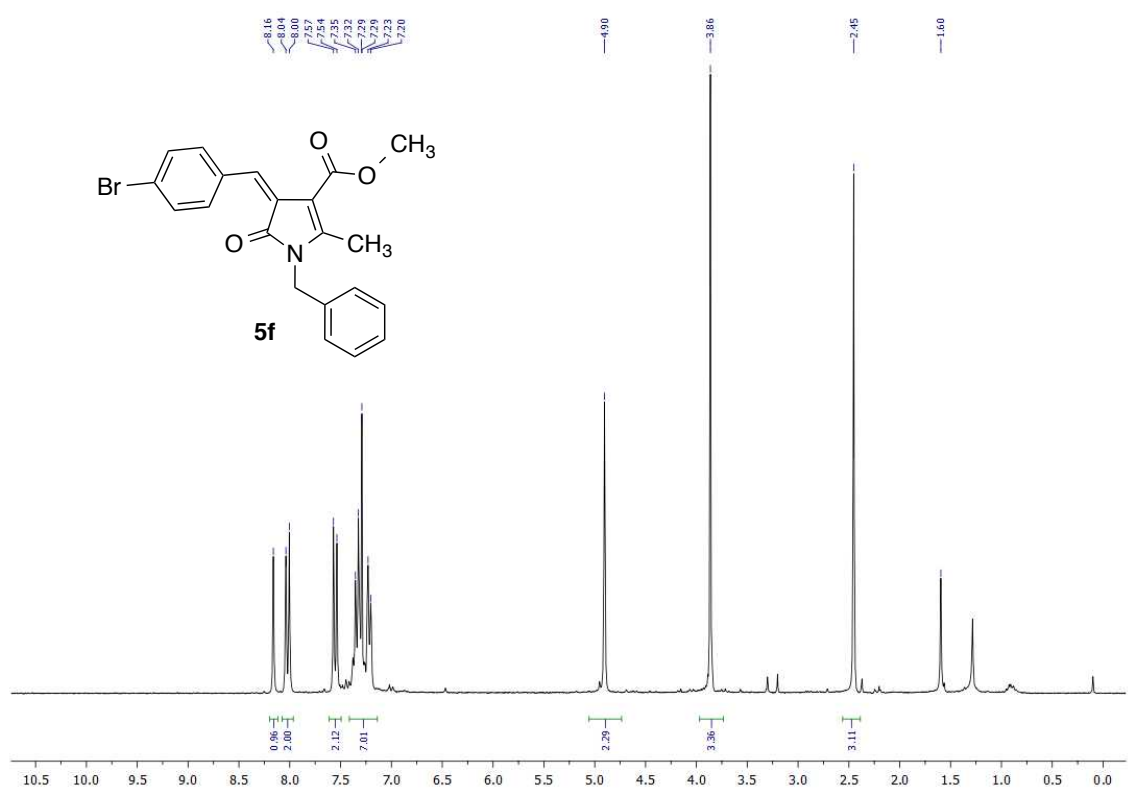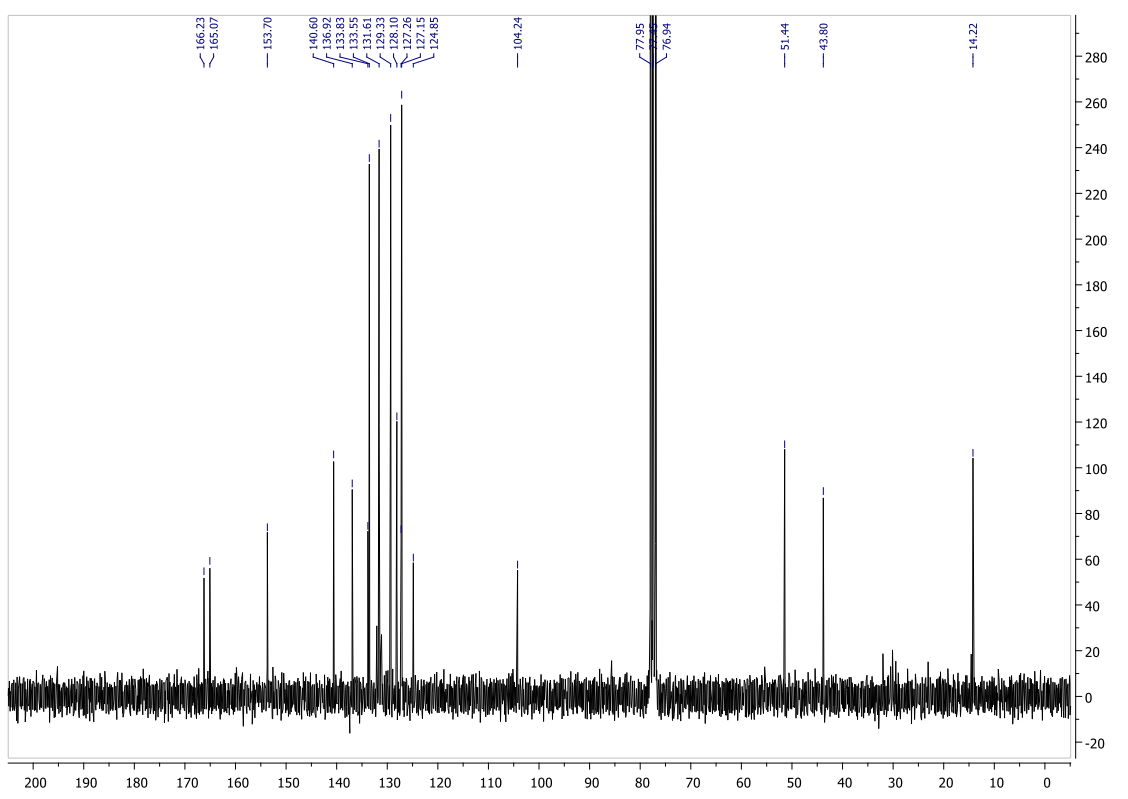

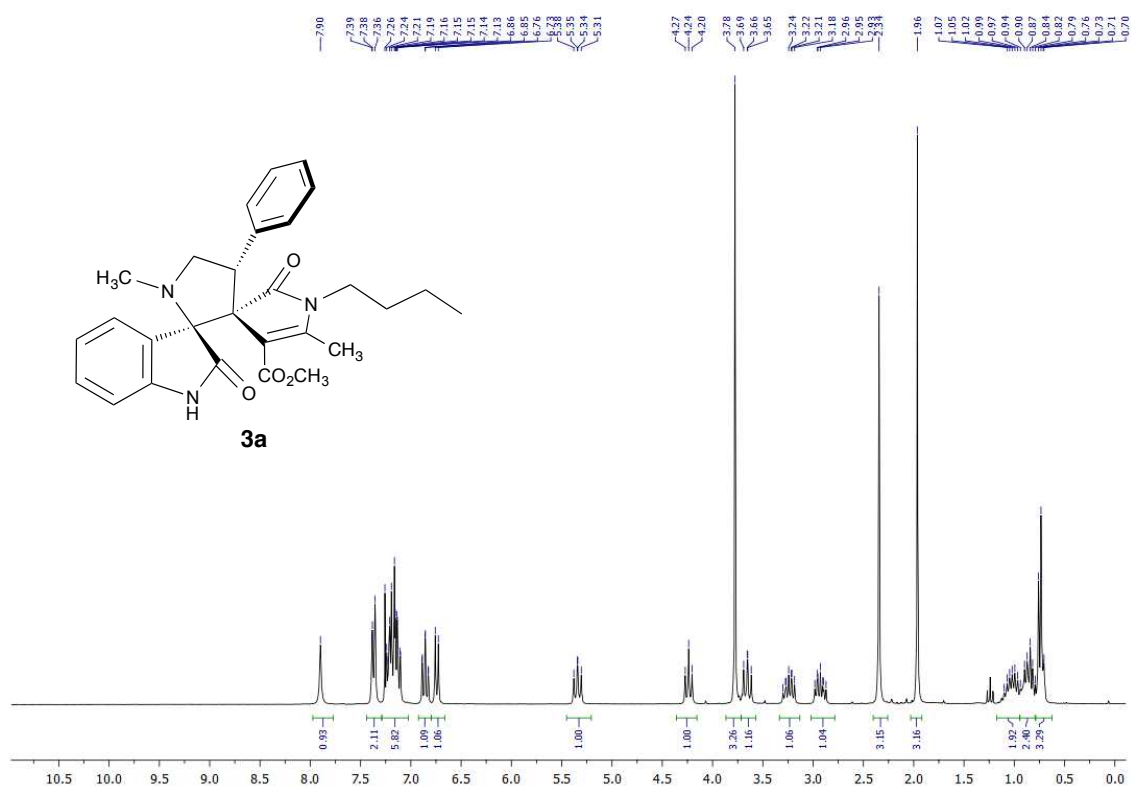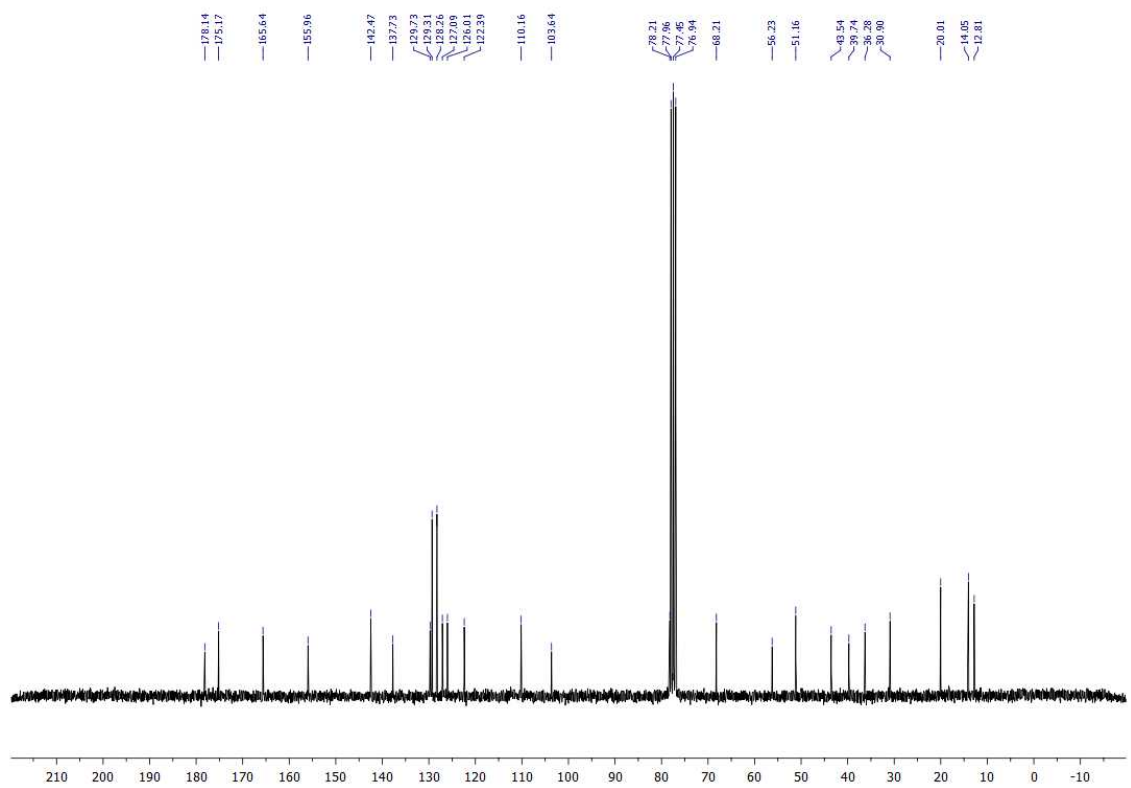

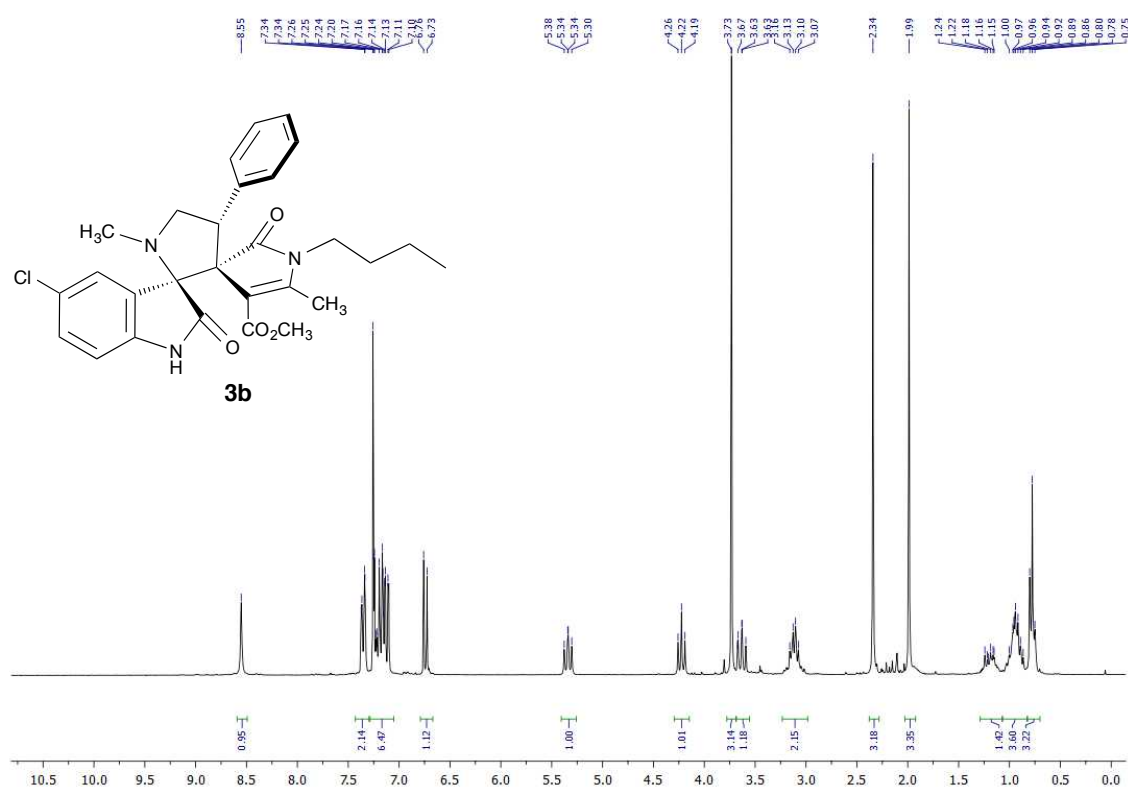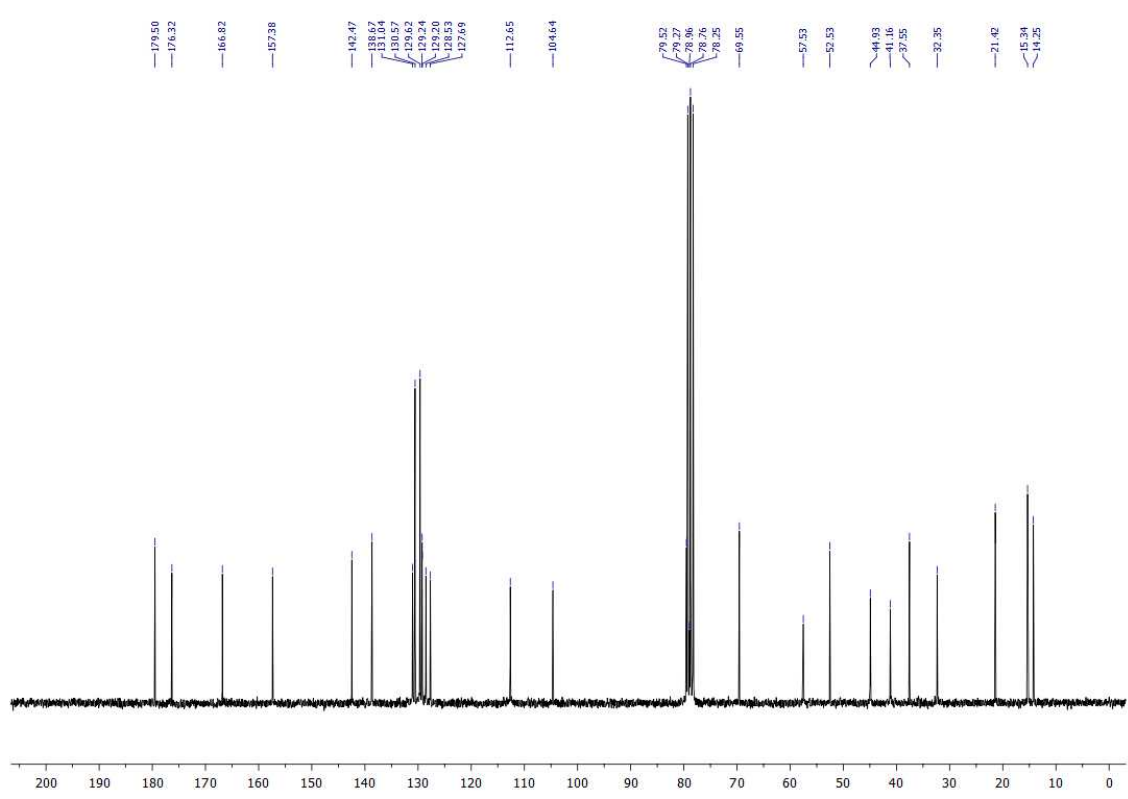

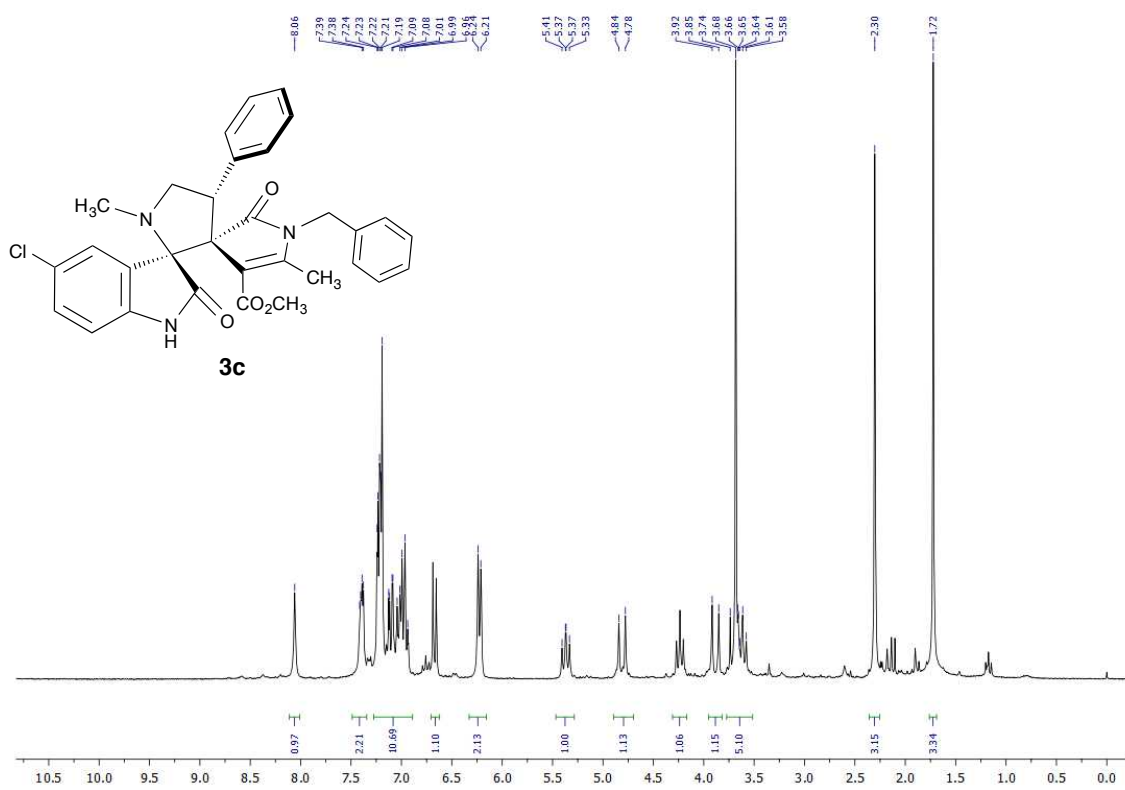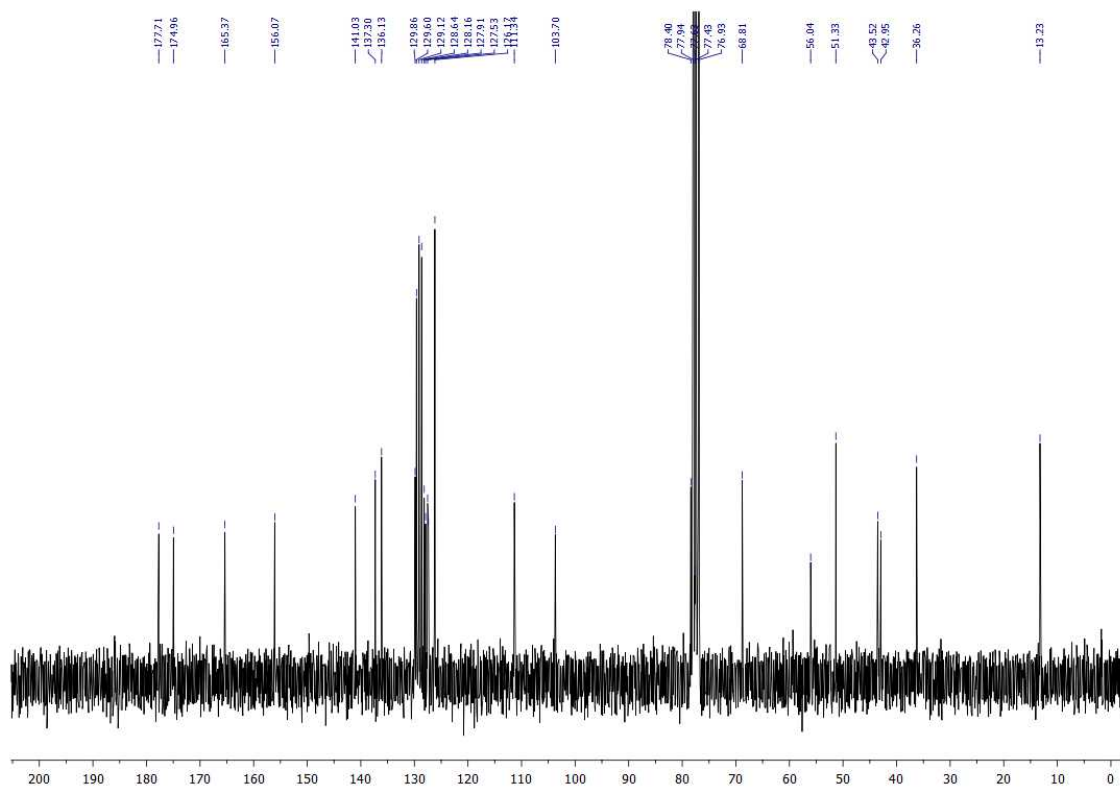

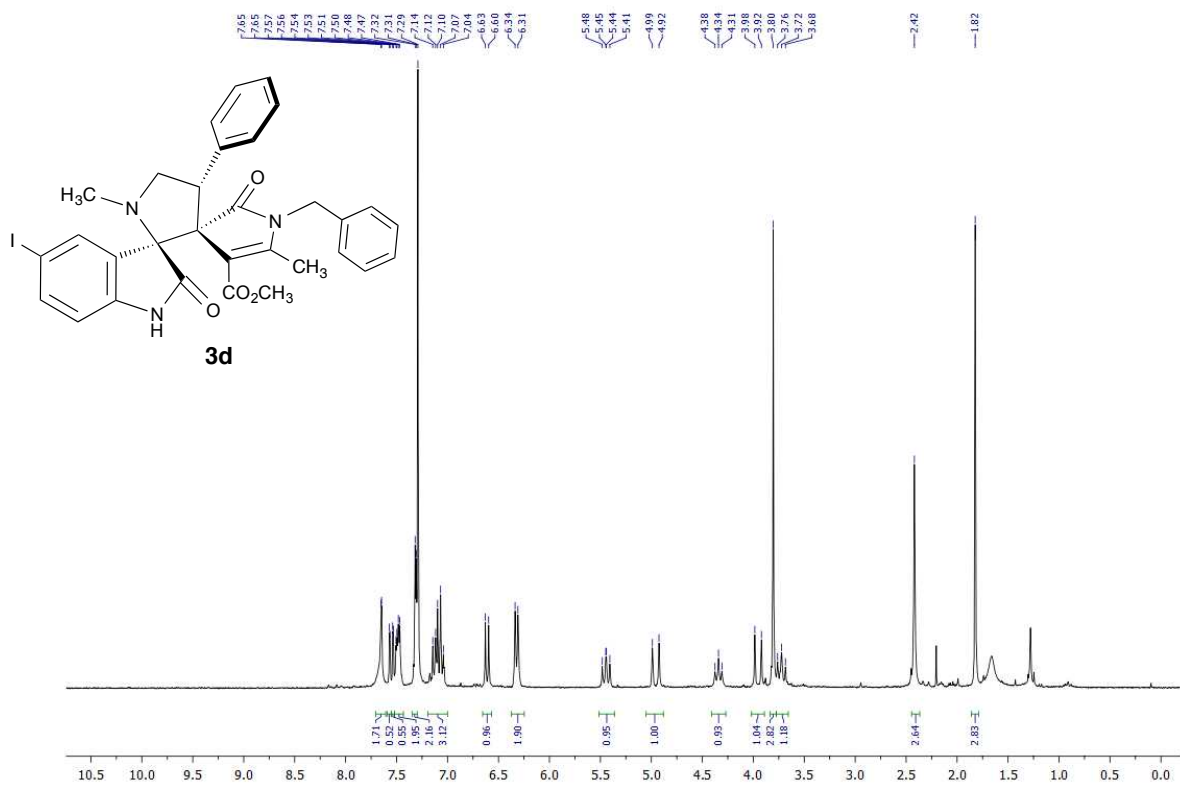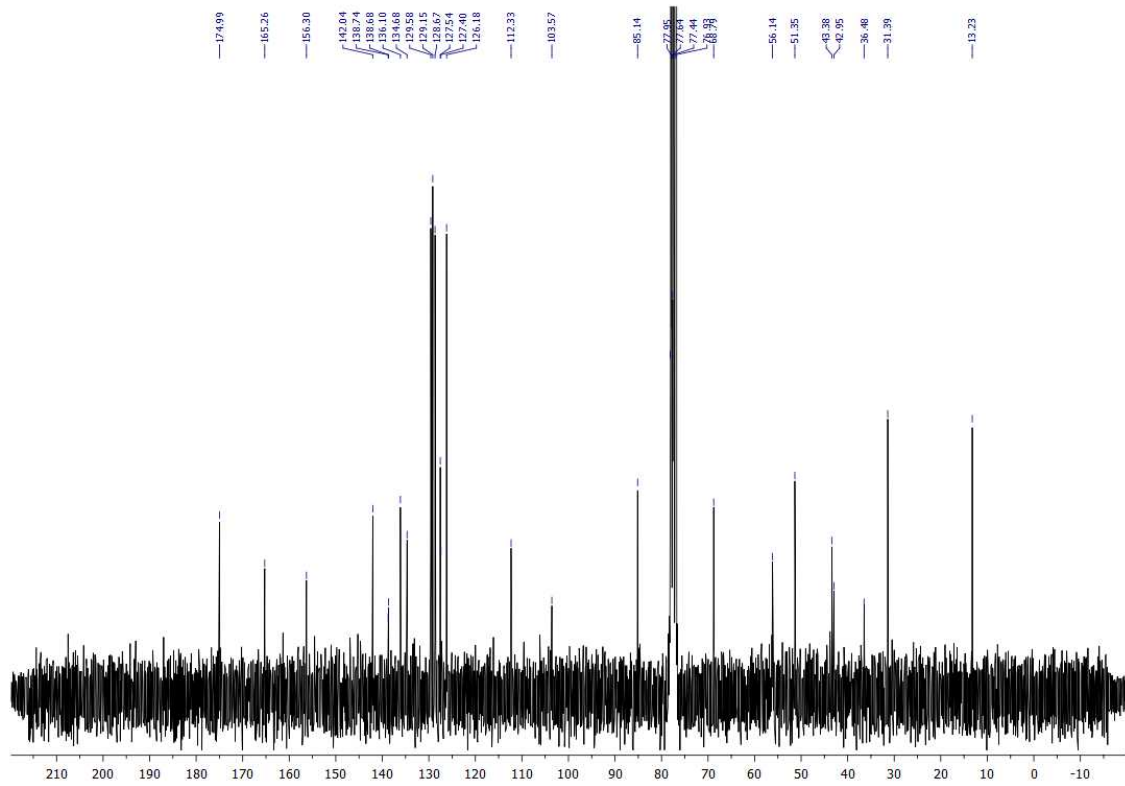

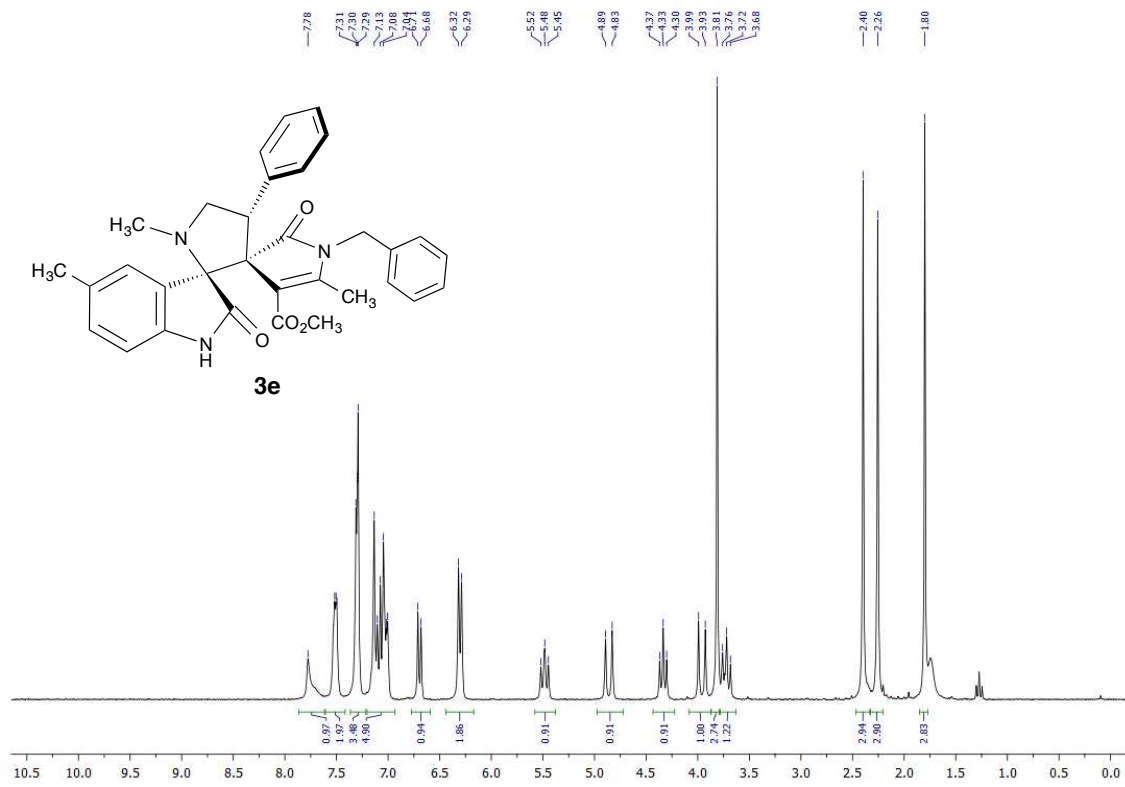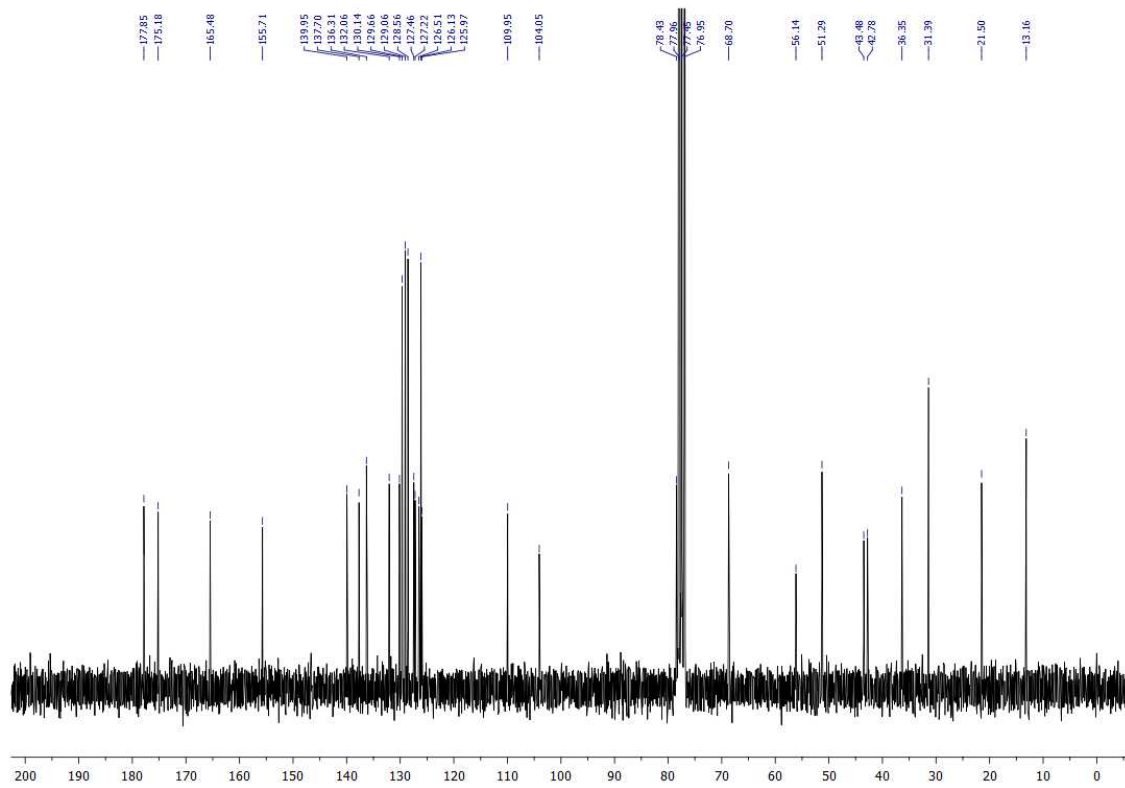

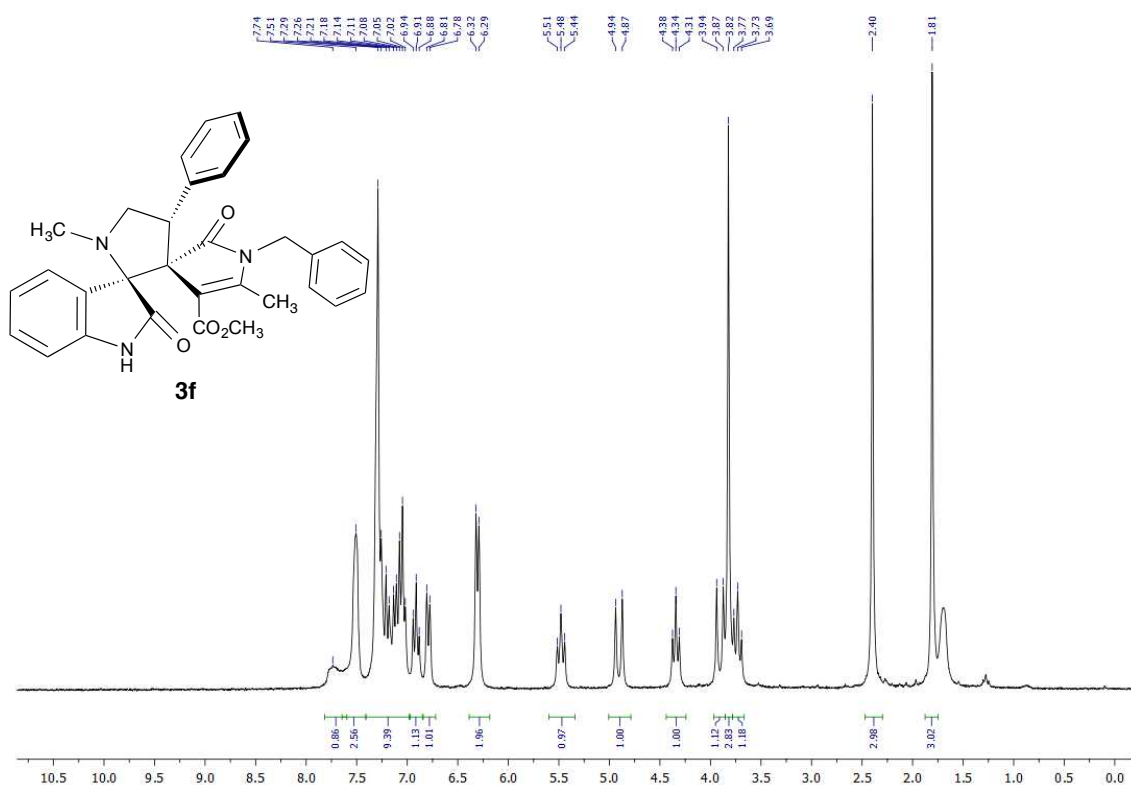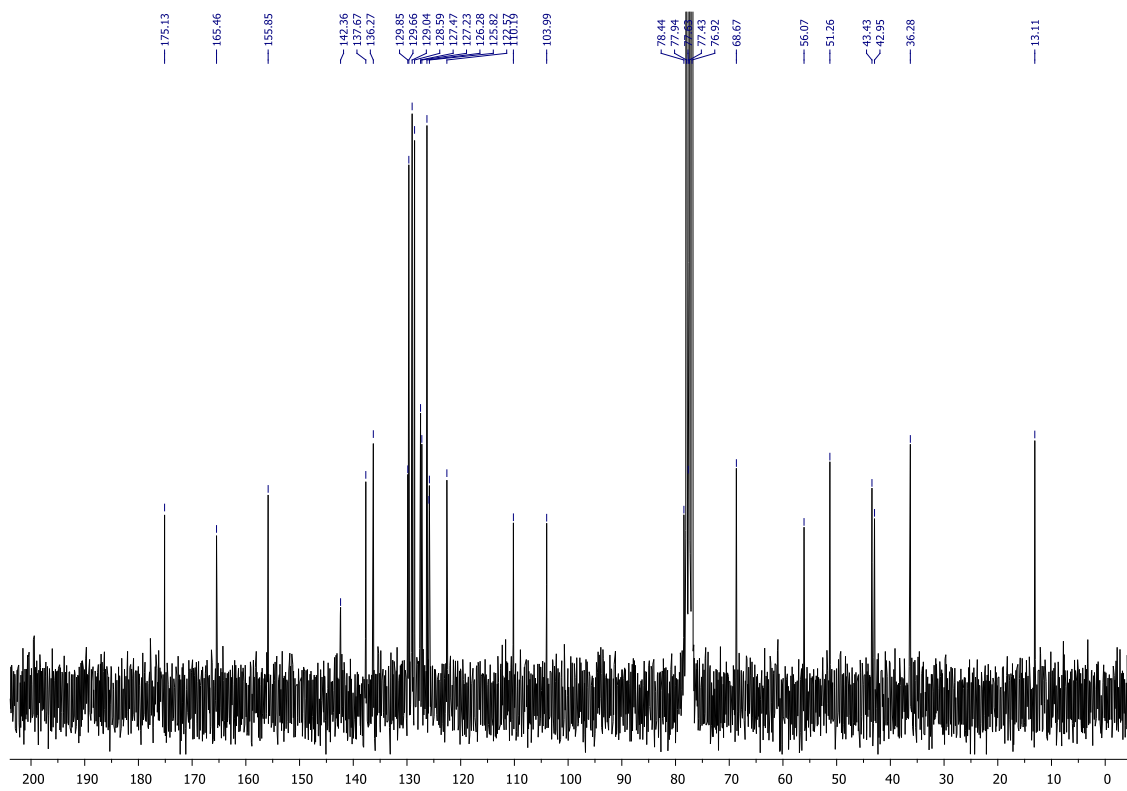



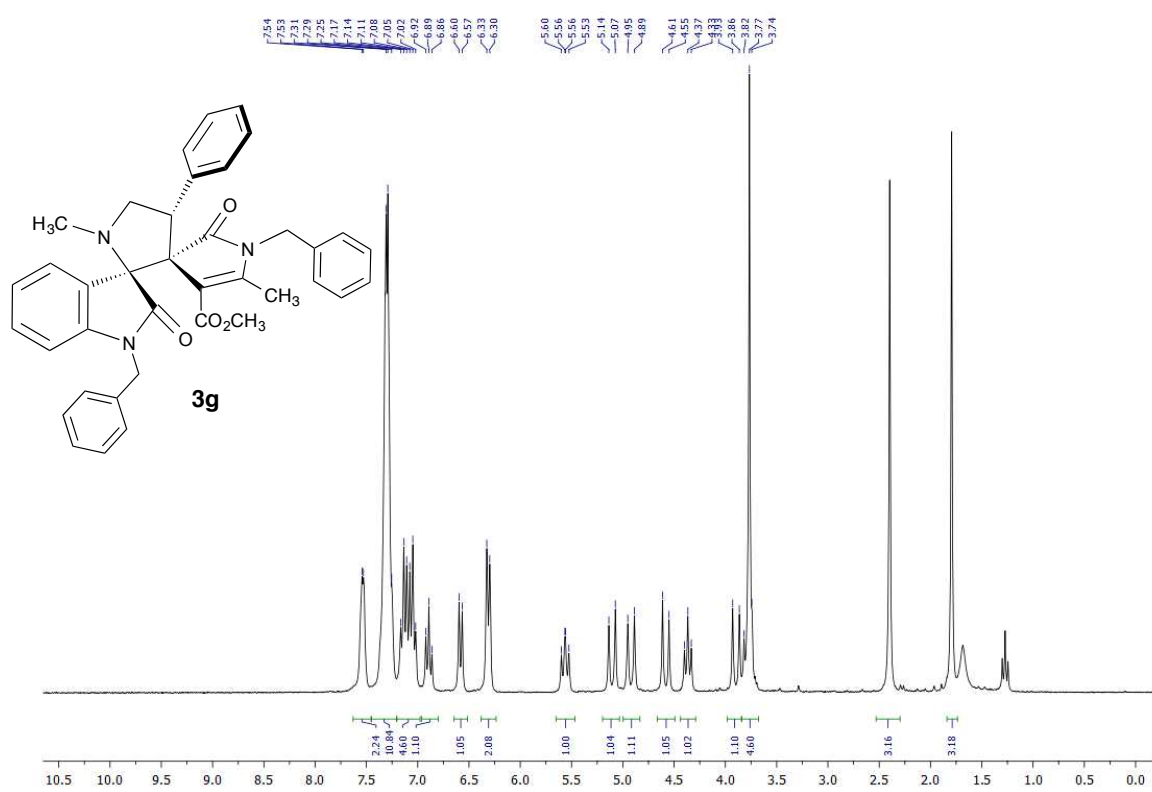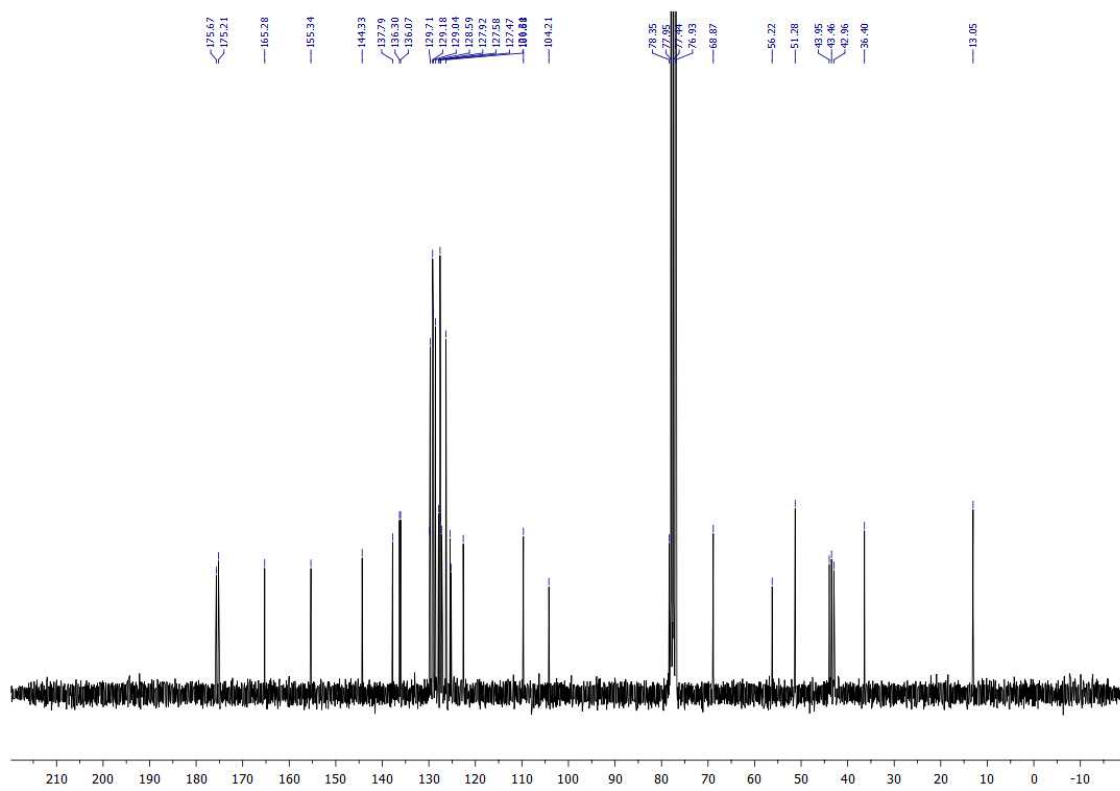

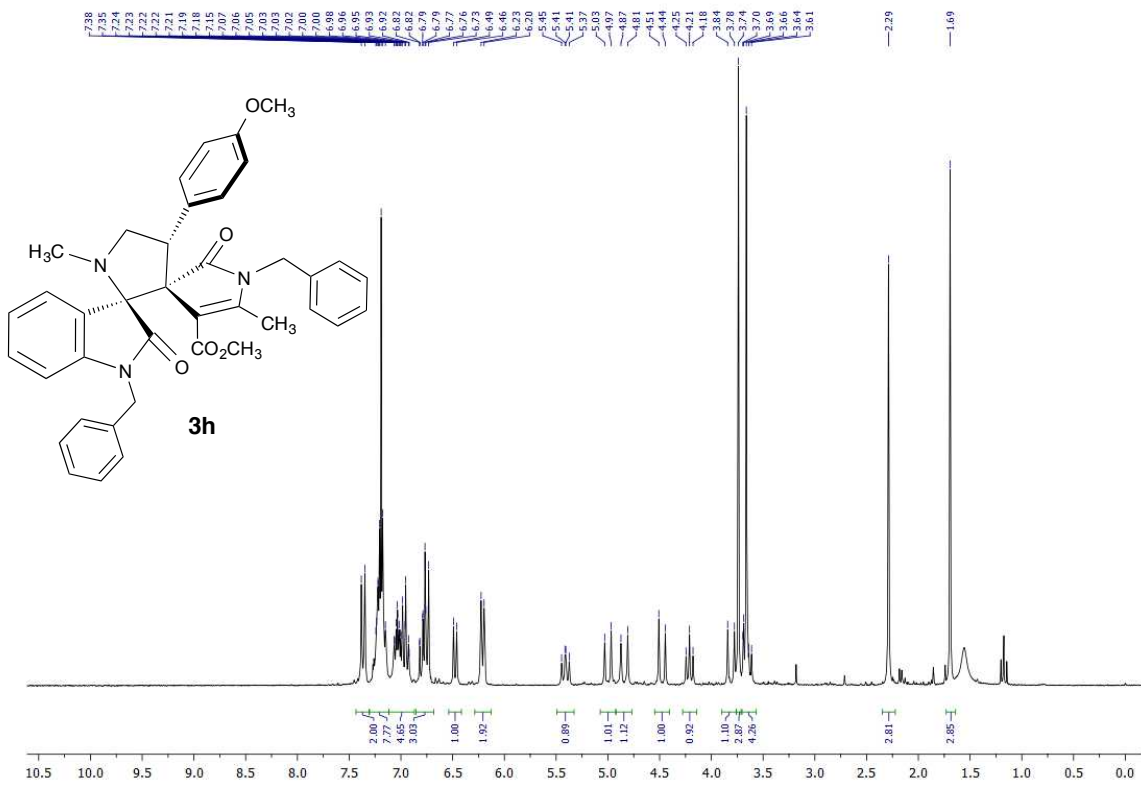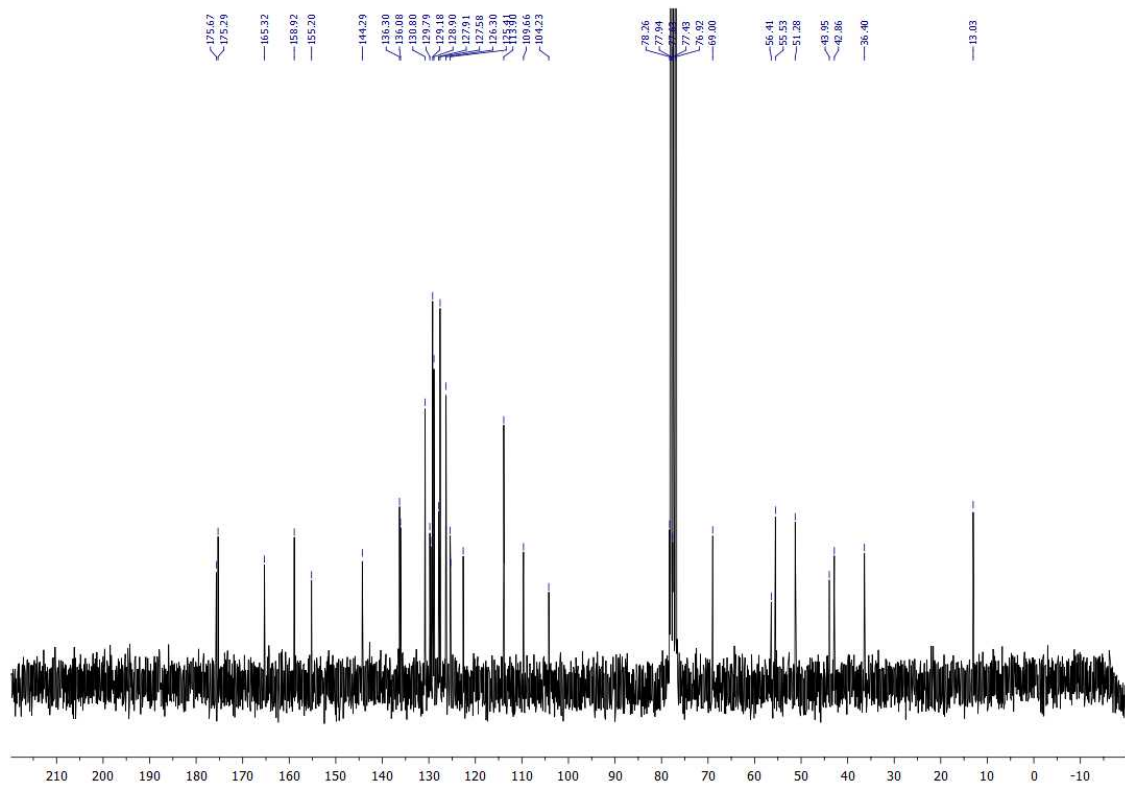

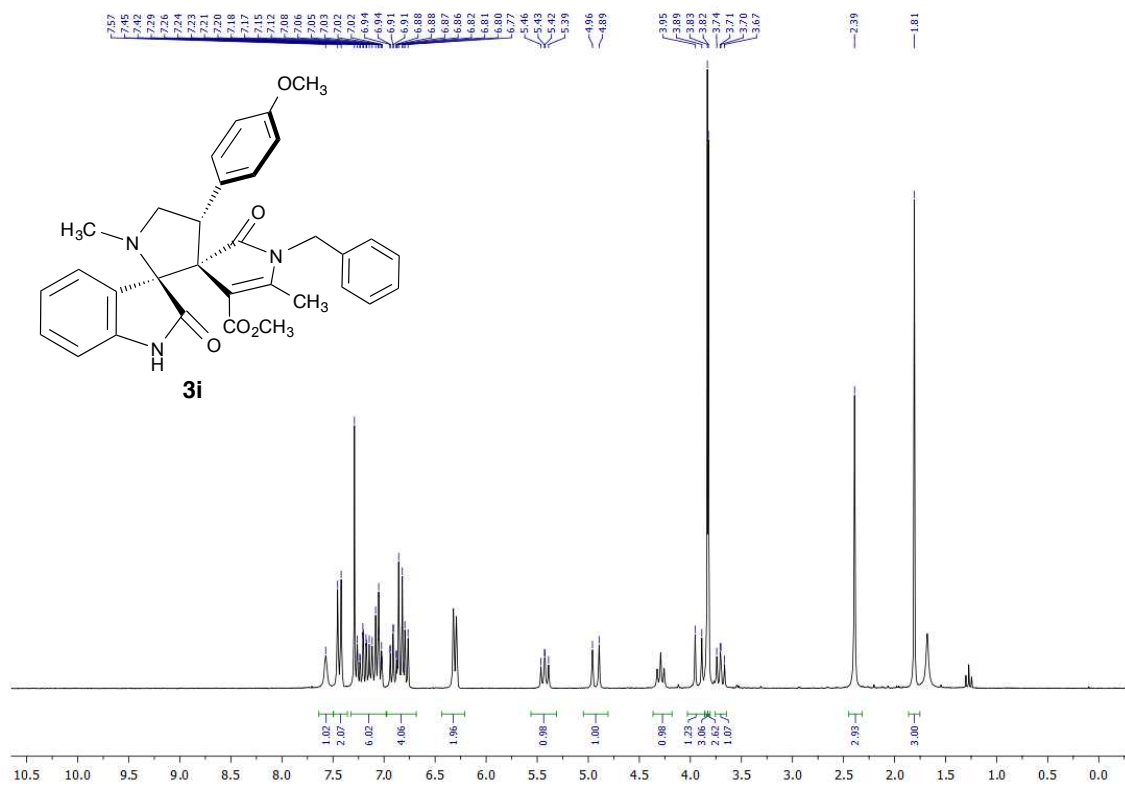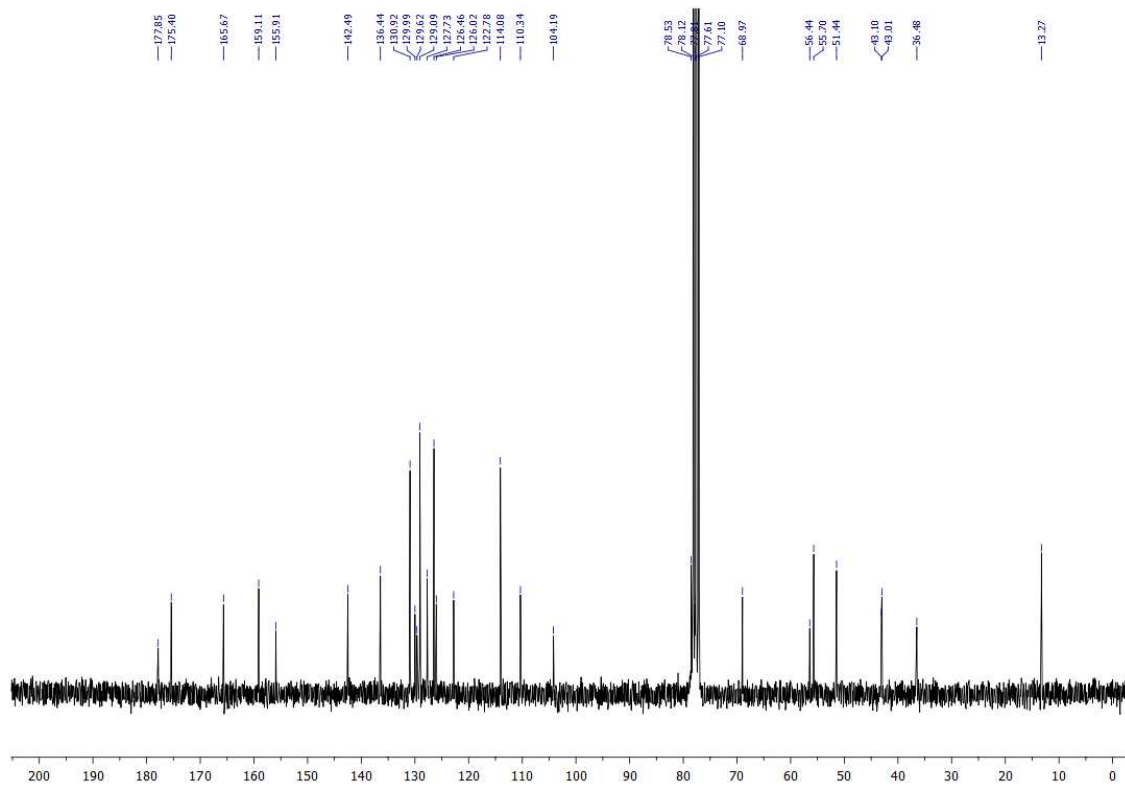

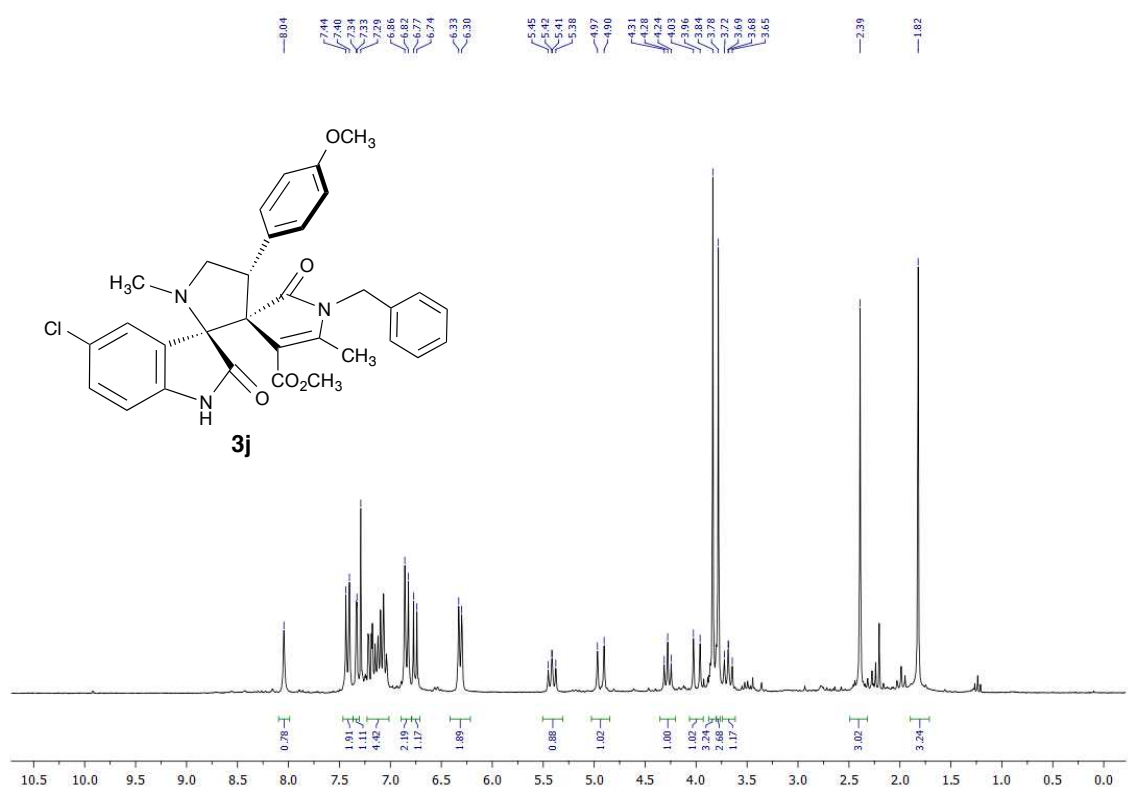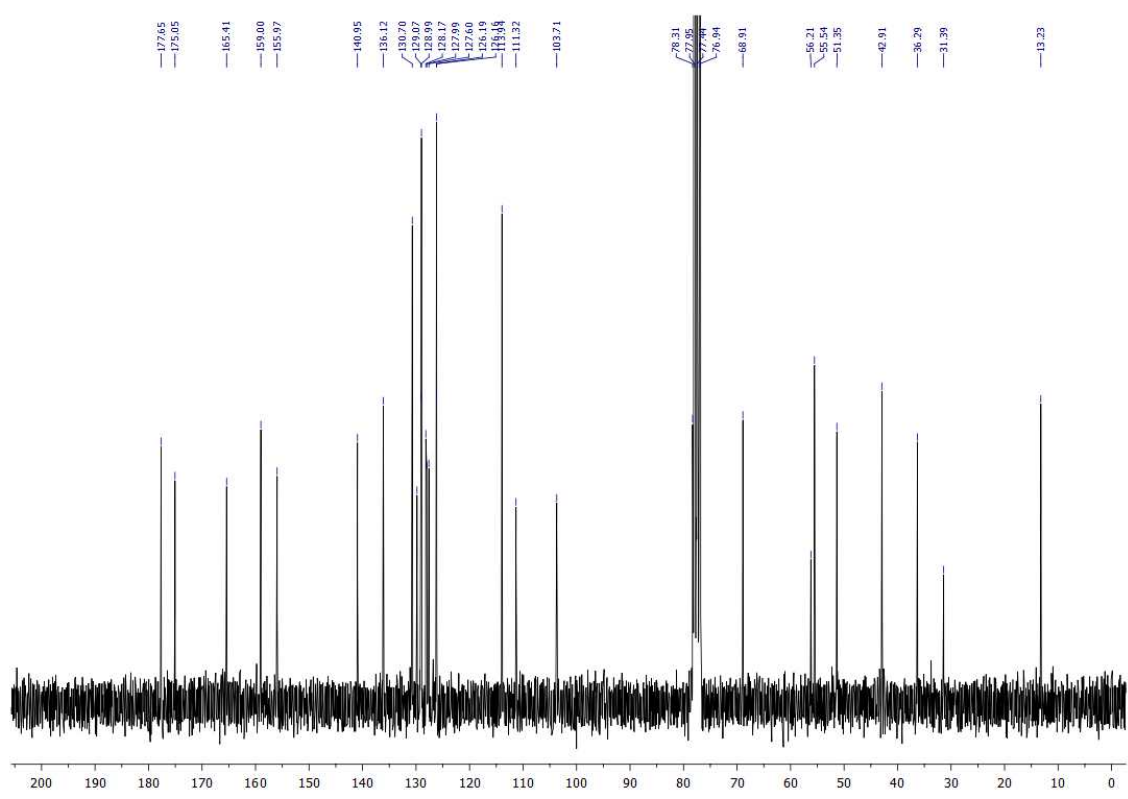

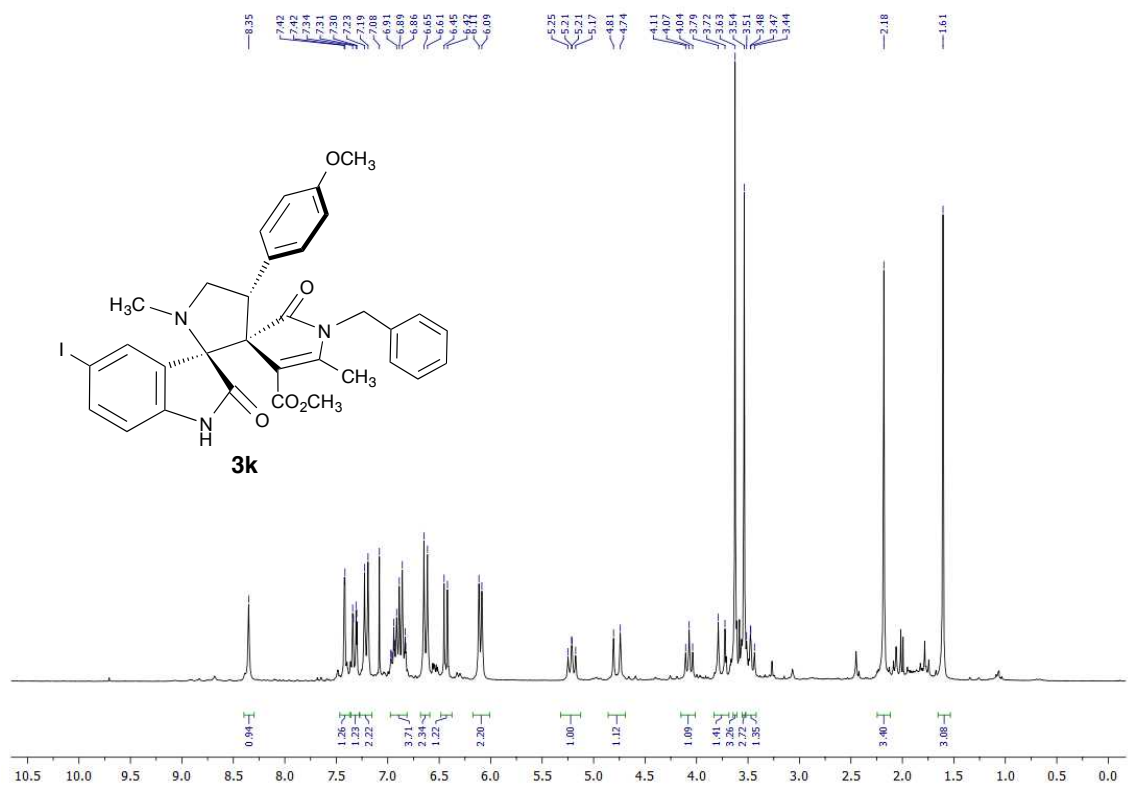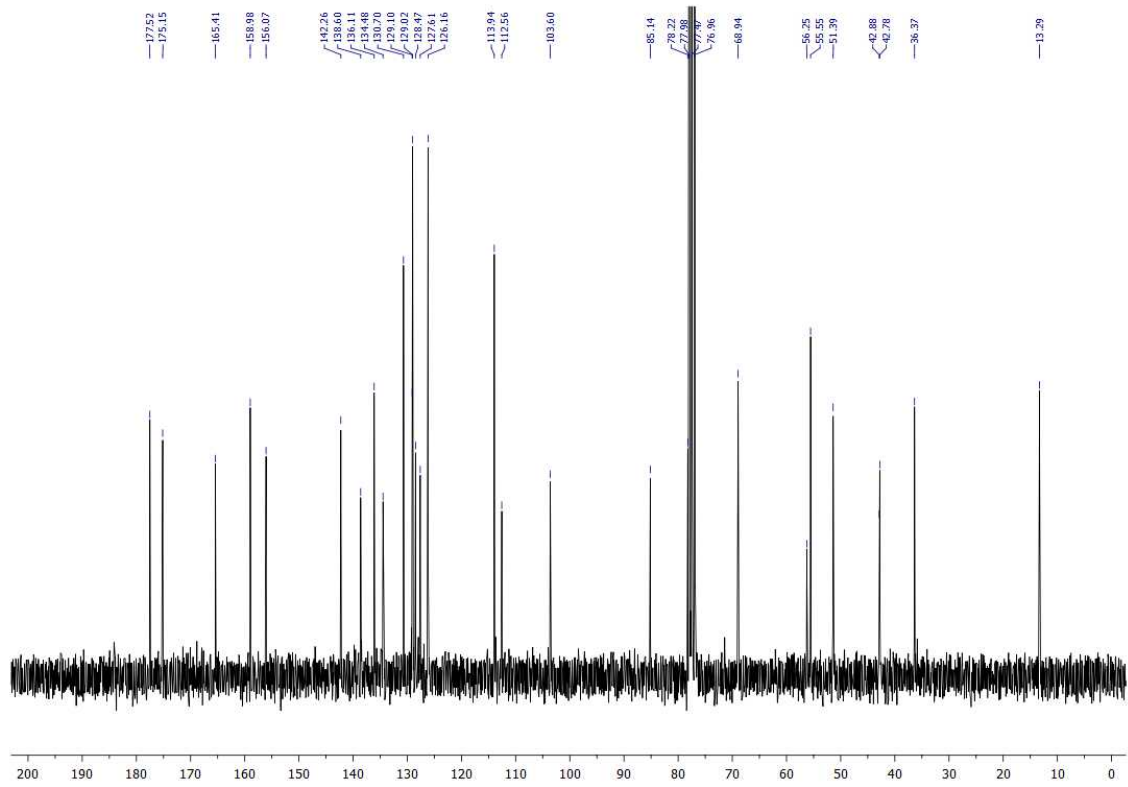

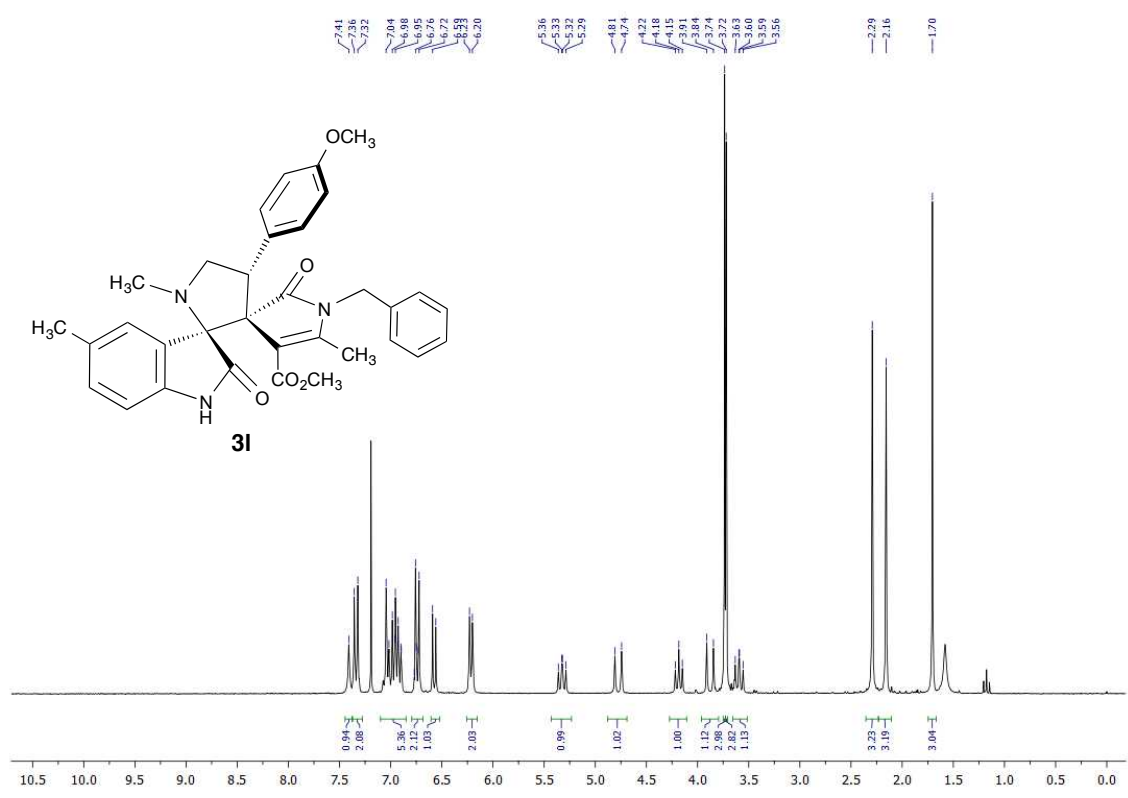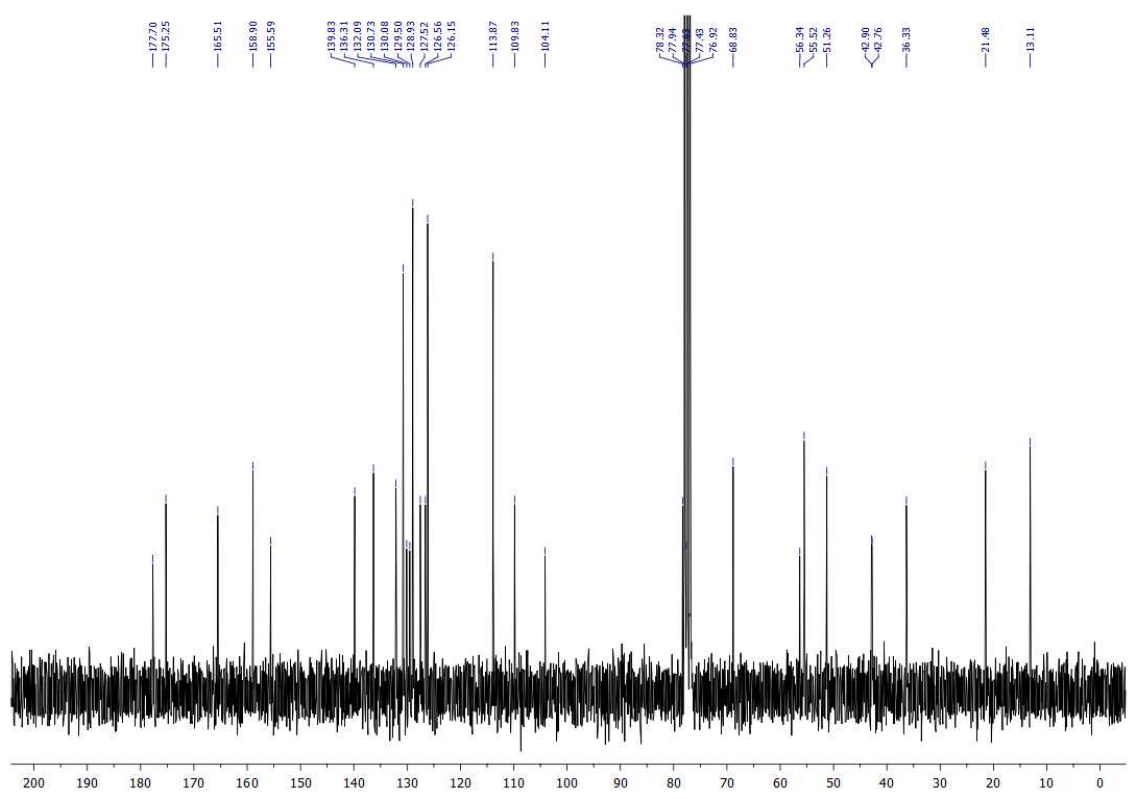

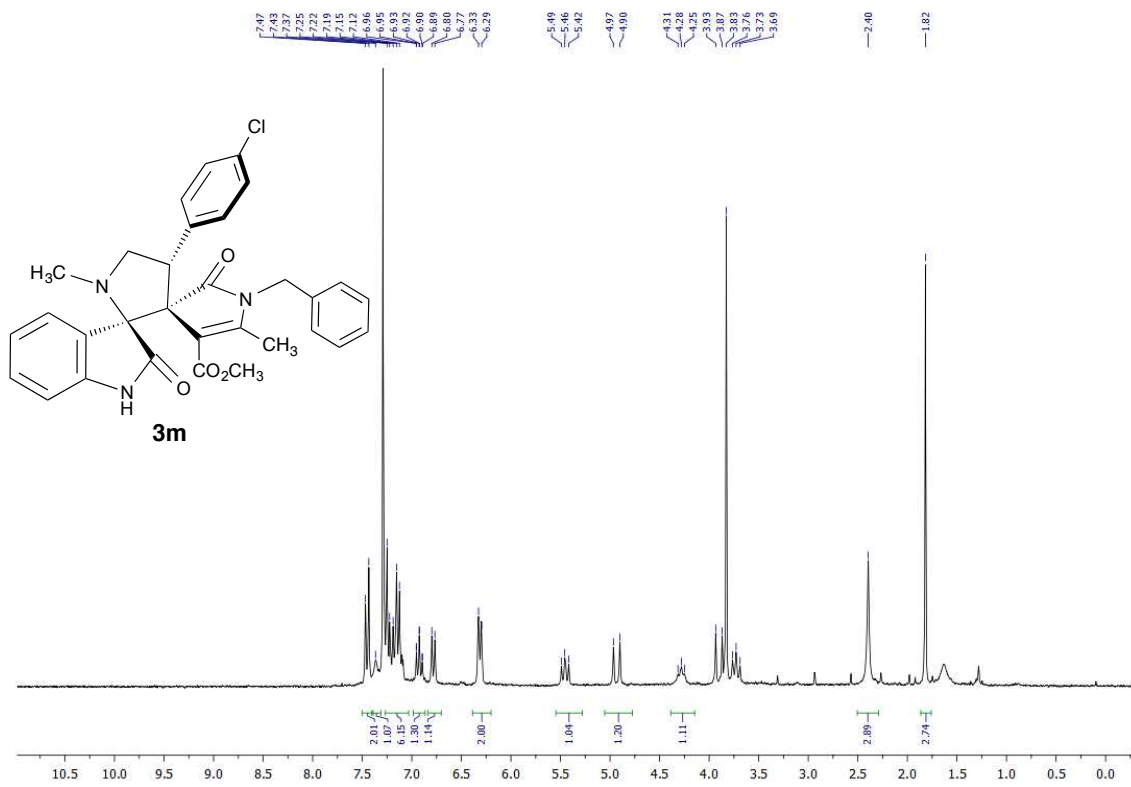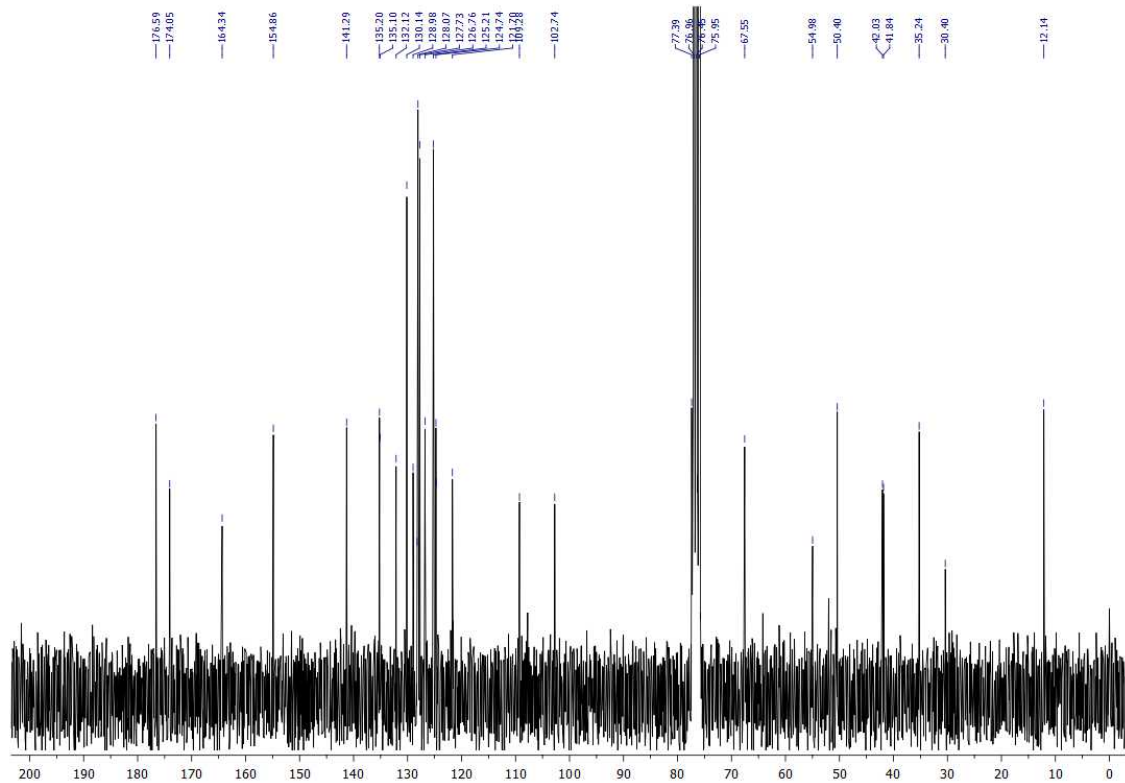

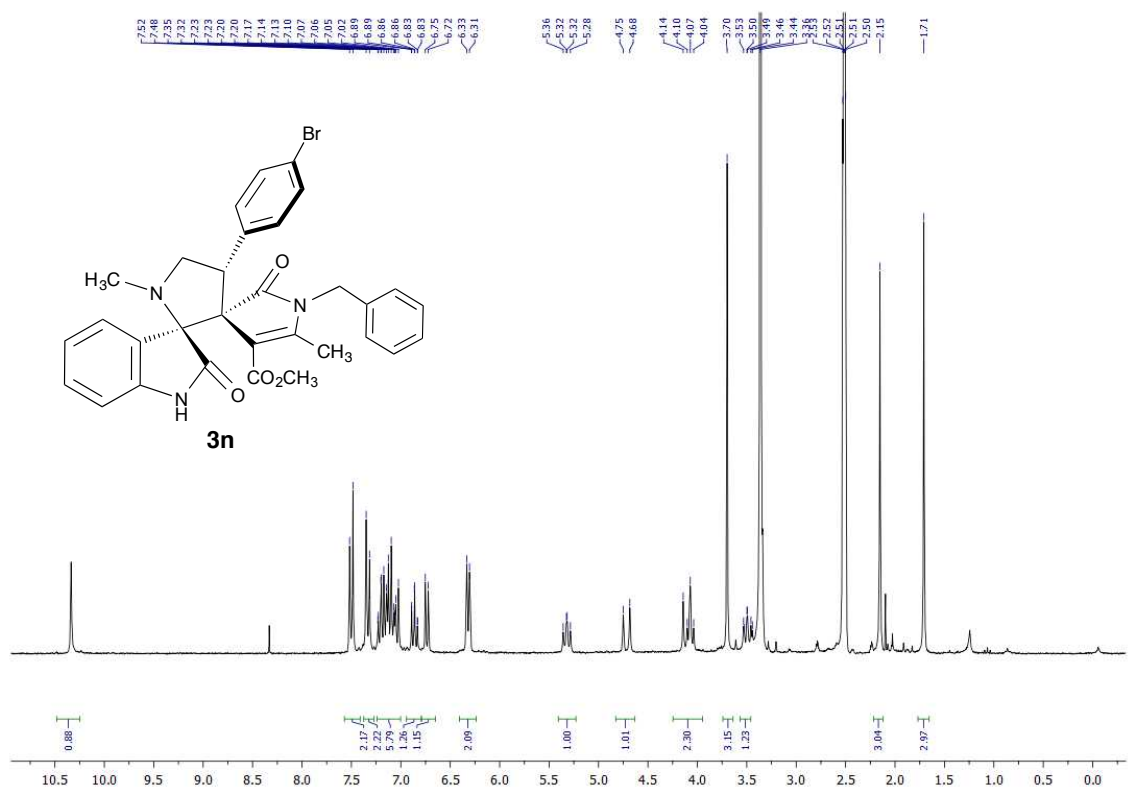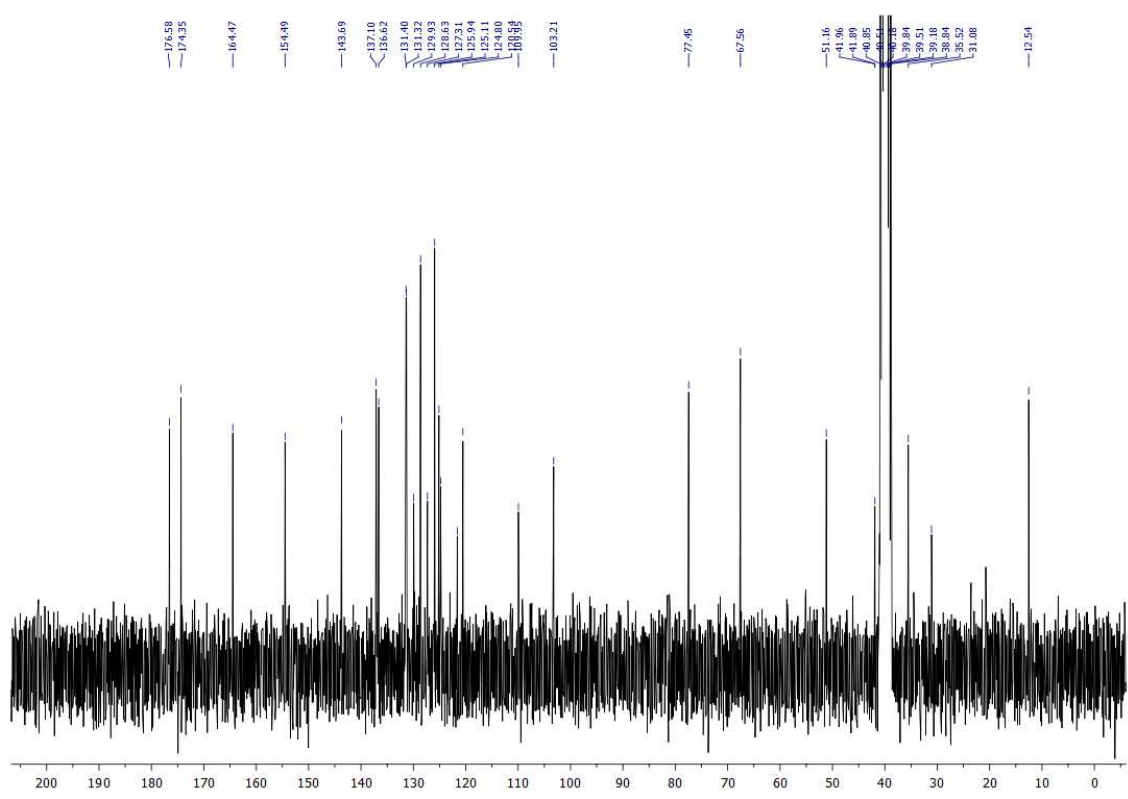



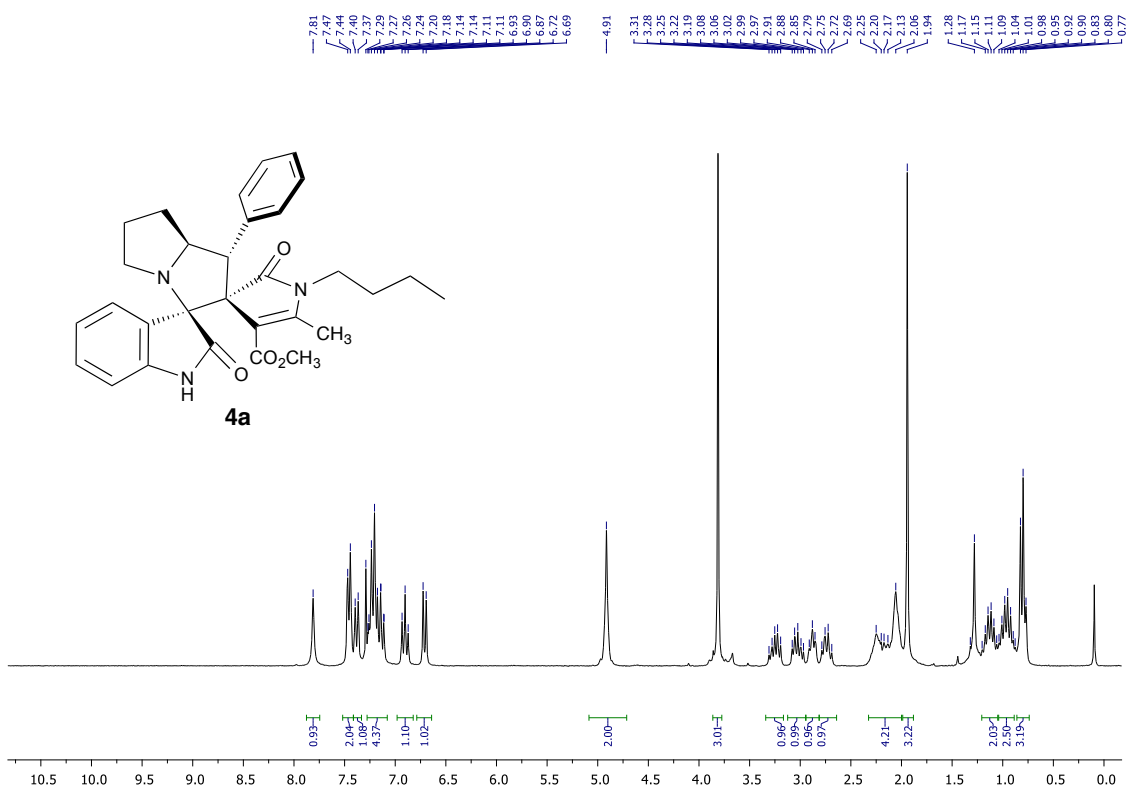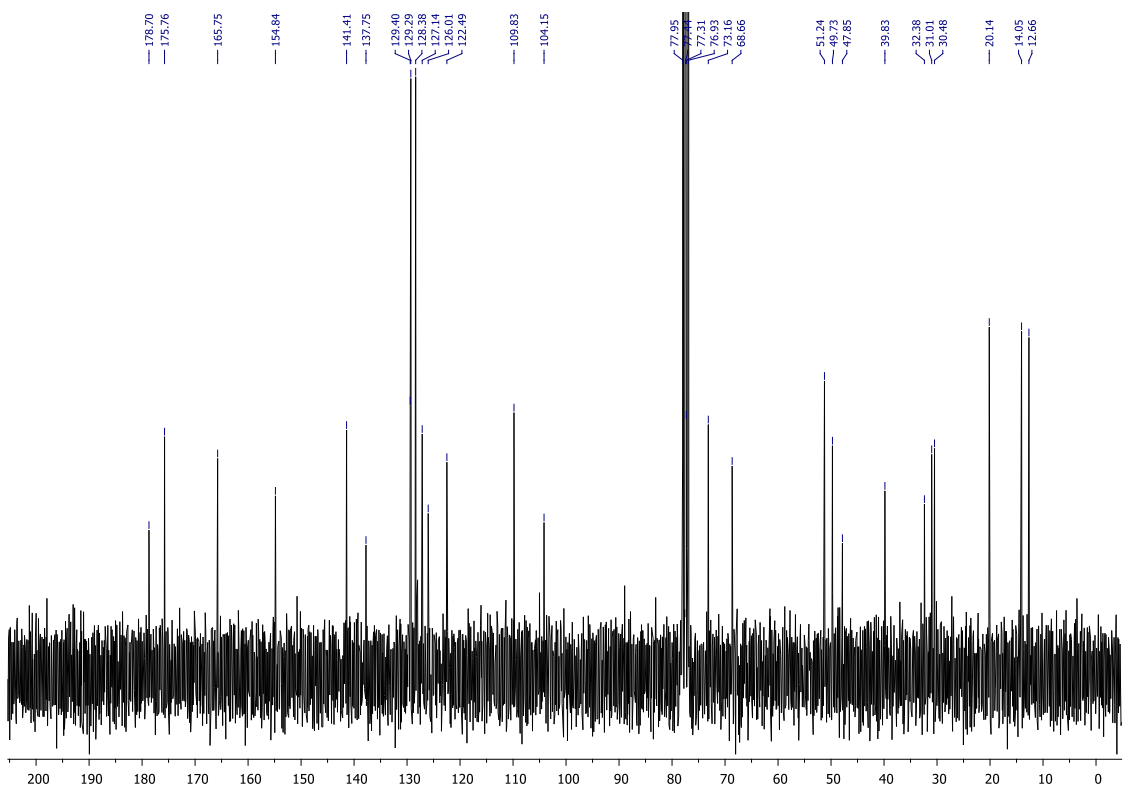

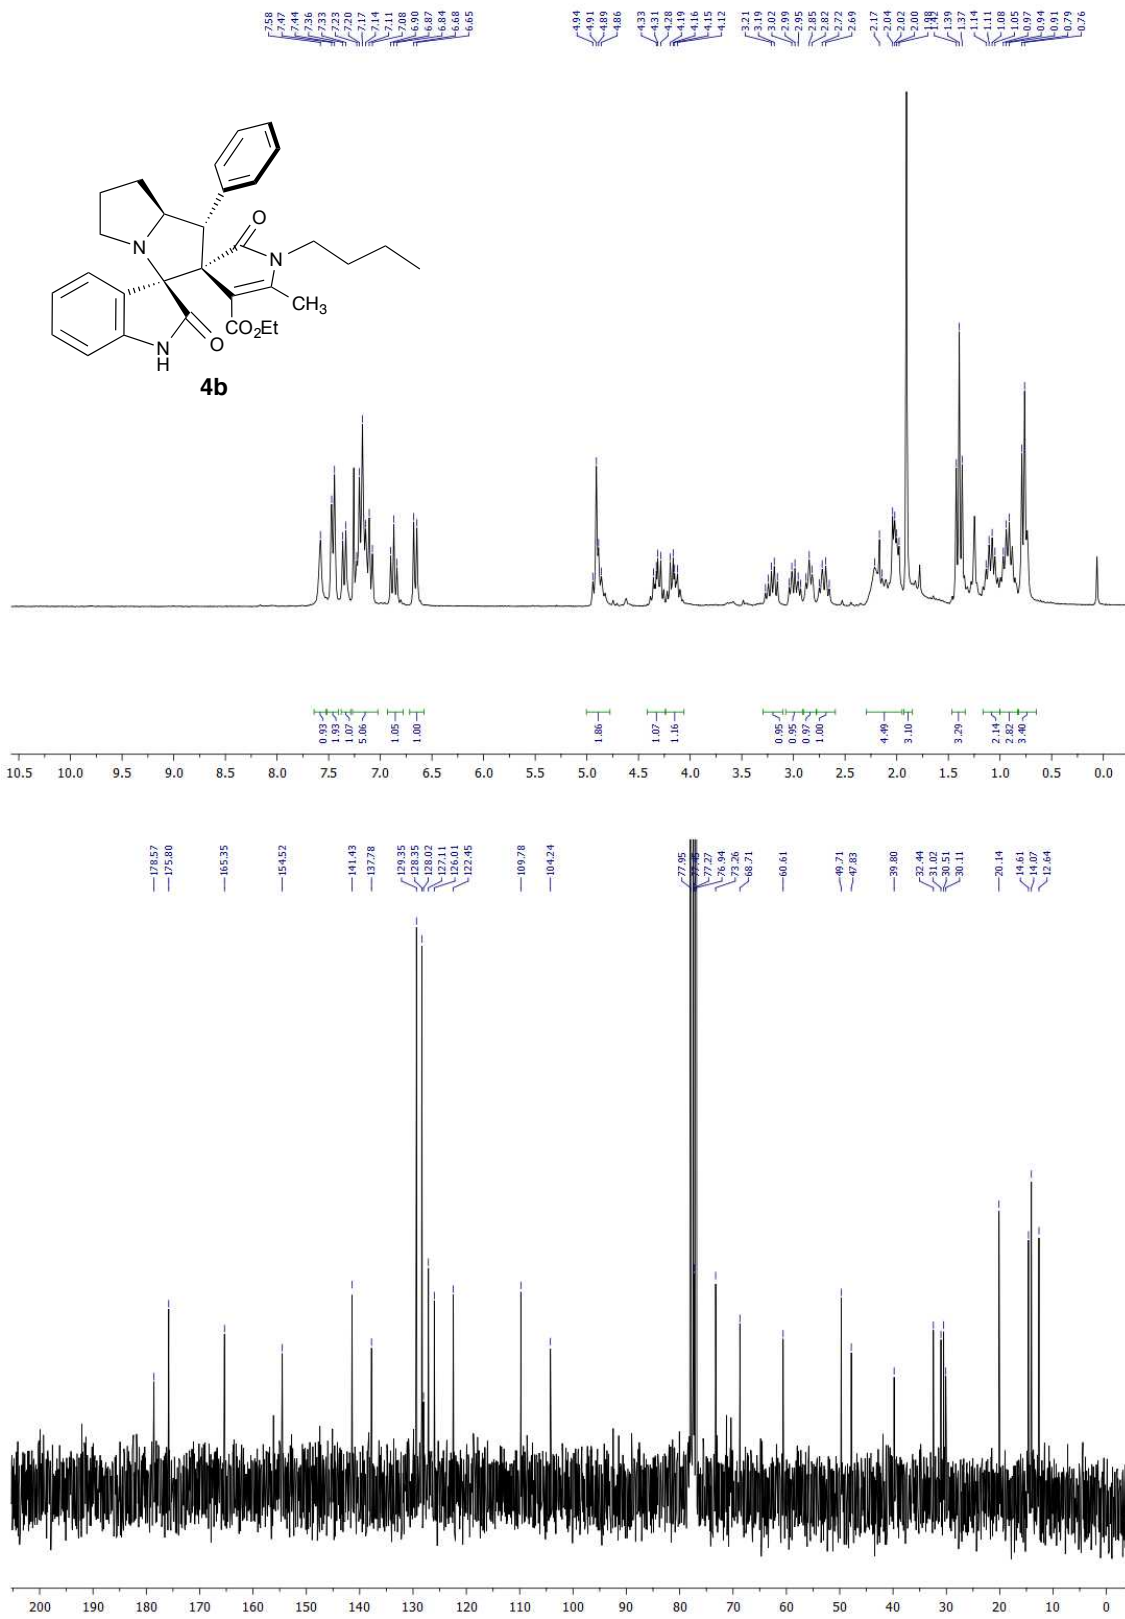

4b NOESY

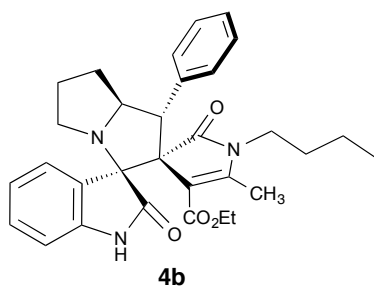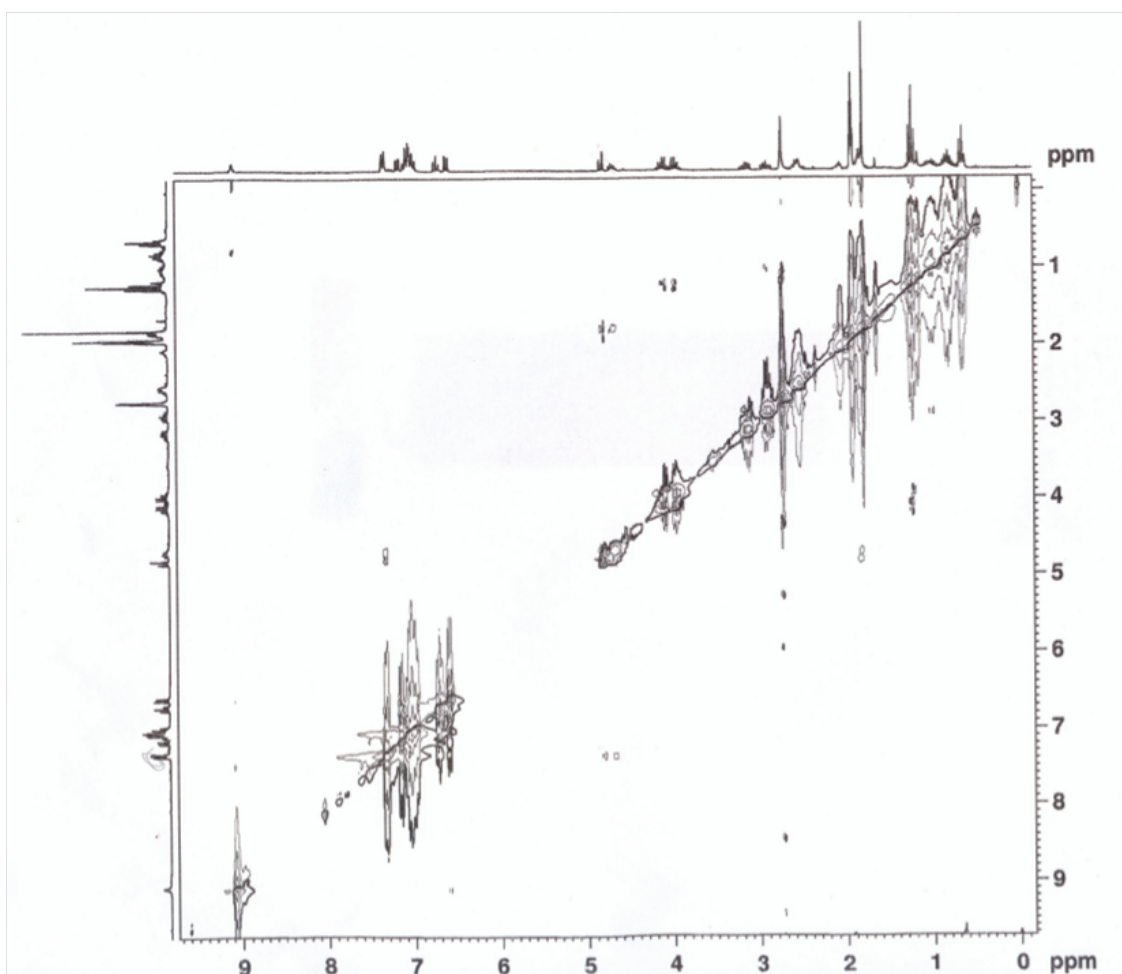

Supplement: c6ra06317a1.pdf [file c6ra06317a1.pdf]
